# Supplementary material for: SUGAR-DIP trial: oral medication strategy versus insulin for diabetes in pregnancy, study protocol for a multicentre, open-label, non-inferiority, randomised controlled trial
Source: PubMed Central journal article supplement — BMJ Open. 2019 Aug 18;9(8):e029808. doi: 10.1136/bmjopen-2019-029808 (PMC6701578; doi:10.1136/bmjopen-2019-029808), 2019-08-18
Supplement: bmjopen-2019-029808.draft_revisions.pdf [file bmjopen-2019-029808.draft_revisions.pdf]

# BMJ Open

BMJ Open is committed to open peer review. As part of this commitment we make the peer review history of every article we publish publicly available.

When an article is published we post the peer reviewers' comments and the authors' responses online. We also post the versions of the paper that were used during peer review. These are the versions that the peer review comments apply to.

The versions of the paper that follow are the versions that were submitted during the peer review process. They are not the versions of record or the final published versions. They should not be cited or distributed as the published version of this manuscript.

BMJ Open is an open access journal and the full, final, typeset and author-corrected version of record of the manuscript is available on our site with no access controls, subscription charges or pay-per-view fees (<http://bmjopen.bmj.com>).

If you have any questions on BMJ Open's open peer review process please email [info.bmjopen@bmj.com](mailto:info.bmjopen@bmj.com)

# BMJ Open

## The SUGAR-DIP trial: oral medication strategy versus insulin for diabetes in pregnancy, study protocol for a multicenter, open label, non-inferiority, randomized controlled trial

|                               |                                                                                                                                                                                                                                                                                                                                                                                                                                                                                                                                                                                                                                                                                                                                                                                                                                                                                                                                                                                                                                                                                                                                                                                                                                                                                                                                                                                                                                                                                                                                                                                                                                                                                                                                                                                                                                                                                                                                                                                                                                                                                                                                                                                                                                                                                                                                                                                      |
|-------------------------------|--------------------------------------------------------------------------------------------------------------------------------------------------------------------------------------------------------------------------------------------------------------------------------------------------------------------------------------------------------------------------------------------------------------------------------------------------------------------------------------------------------------------------------------------------------------------------------------------------------------------------------------------------------------------------------------------------------------------------------------------------------------------------------------------------------------------------------------------------------------------------------------------------------------------------------------------------------------------------------------------------------------------------------------------------------------------------------------------------------------------------------------------------------------------------------------------------------------------------------------------------------------------------------------------------------------------------------------------------------------------------------------------------------------------------------------------------------------------------------------------------------------------------------------------------------------------------------------------------------------------------------------------------------------------------------------------------------------------------------------------------------------------------------------------------------------------------------------------------------------------------------------------------------------------------------------------------------------------------------------------------------------------------------------------------------------------------------------------------------------------------------------------------------------------------------------------------------------------------------------------------------------------------------------------------------------------------------------------------------------------------------------|
| Journal:                      | <i>BMJ Open</i>                                                                                                                                                                                                                                                                                                                                                                                                                                                                                                                                                                                                                                                                                                                                                                                                                                                                                                                                                                                                                                                                                                                                                                                                                                                                                                                                                                                                                                                                                                                                                                                                                                                                                                                                                                                                                                                                                                                                                                                                                                                                                                                                                                                                                                                                                                                                                                      |
| Manuscript ID                 | bmjopen-2019-029808                                                                                                                                                                                                                                                                                                                                                                                                                                                                                                                                                                                                                                                                                                                                                                                                                                                                                                                                                                                                                                                                                                                                                                                                                                                                                                                                                                                                                                                                                                                                                                                                                                                                                                                                                                                                                                                                                                                                                                                                                                                                                                                                                                                                                                                                                                                                                                  |
| Article Type:                 | Protocol                                                                                                                                                                                                                                                                                                                                                                                                                                                                                                                                                                                                                                                                                                                                                                                                                                                                                                                                                                                                                                                                                                                                                                                                                                                                                                                                                                                                                                                                                                                                                                                                                                                                                                                                                                                                                                                                                                                                                                                                                                                                                                                                                                                                                                                                                                                                                                             |
| Date Submitted by the Author: | 12-Feb-2019                                                                                                                                                                                                                                                                                                                                                                                                                                                                                                                                                                                                                                                                                                                                                                                                                                                                                                                                                                                                                                                                                                                                                                                                                                                                                                                                                                                                                                                                                                                                                                                                                                                                                                                                                                                                                                                                                                                                                                                                                                                                                                                                                                                                                                                                                                                                                                          |
| Complete List of Authors:     | <p>de Wit, Leon; University Medical Center Utrecht, Utrecht University, Department of Obstetrics and Gynaecology<br/>           Rademaker, D.; Amsterdam University Medical Centers, University of Amsterdam, Department of Obstetrics &amp; Gynaecology<br/>           Voormolen, D.; University Medical Center Utrecht, Utrecht University, Department of Obstetrics &amp; Gynaecology<br/>           Akerboom, B.; Albert Schweitzer Hospital, Department of Obstetrics &amp; Gynaecology<br/>           Kiewiet-Kemper, R.; Albert Schweitzer Hospital, Department of Internal Medicine<br/>           Soeters, M.; Amsterdam University Medical Centers, University of Amsterdam, Department of Endocrinology &amp; Metabolism<br/>           Verwij-Didden, M.; Bernhoven Hospital, Department of Obstetrics &amp; Gynaecology<br/>           Assouiki, F.; Bernhoven Hospital, Department of Internal Medicine<br/>           Schippers, D.; Canisius Wilhelmina Hospital, Department of Obstetrics &amp; Gynaecology<br/>           Vermeulen, M.; Canisius Wilhelmina Hospital, Department of Internal Medicine<br/>           Kuppens, S.; Catharina Hospital, Department of Obstetrics &amp; Gynaecology<br/>           Oosterwerff, M.; Catharina Hospital, Department of Internal Medicine<br/>           Zwart, J.; Deventer Hospital, Department of Obstetrics &amp; Gynaecology<br/>           Diekman, M.; Deventer Hospital, Department of Internal Medicine<br/>           Vogelvang, T.; Diaconessenhuis Utrecht, Department of Obstetrics &amp; Gynaecology<br/>           Gallas, P.; Diaconessenhuis Utrecht, Department of Internal Medicine<br/>           Galjaard, S.; Erasmus MC University Medical Center Rotterdam, Department of Obstetrics and Prenatal Medicine<br/>           Visser, W.; Erasmus MC University Medical Center Rotterdam, Department of Obstetrics and Prenatal Medicine<br/>           Horree, N.; Flevoziekenhuis, Department of Obstetrics &amp; Gynaecology<br/>           Klooker, T.; Flevoziekenhuis, Department of Internal Medicine<br/>           Laan, R.; Gelderse Vallei Hospital, Department of Obstetrics &amp; Gynaecology<br/>           Heijligenberg, R.; Gelderse Vallei Hospital, Department of Internal Medicine<br/>           Huisjes, A.; Gelre Hospitals, Department of Obstetrics &amp; Gynaecology</p> |

|    |                                                                          |
|----|--------------------------------------------------------------------------|
| 1  |                                                                          |
| 2  |                                                                          |
| 3  |                                                                          |
| 4  | van Bommel, T.; Gelre Hospitals, Department of Internal Medicine         |
| 5  | van Meir, C.; Groene Hart Hospital, Department of Obstetrics &           |
| 6  | Gynaecology                                                              |
| 7  | van den Beld, A.; Groene Hart Hospital, Department of Internal Medicine  |
| 8  | Hermes, W.; Haaglanden Medical Center, Department of Obstetrics &        |
| 9  | Gynaecology                                                              |
| 10 | Vidarsdottir, S.; Haaglanden Medical Center, Department of Internal      |
| 11 | Medicine                                                                 |
| 12 | Veldhuis-Vlug, A.; Medical Center Jan van Goyen, Department of Internal  |
| 13 | Medicine                                                                 |
| 14 | Dullemond, R.; Jeroen Bosch Hospital, Department of Obstetrics &         |
| 15 | Gynaecology                                                              |
| 16 | Jansen, H. J.; Jeroen Bosch Hospital, Department of Internal Medicine    |
| 17 | Sueters, M.; Leiden University Medical Center, Department of Obstetrics  |
| 18 | & Gynaecology                                                            |
| 19 | de Koning, E.; Leiden University Medical Center, Department of Medicine  |
| 20 | van Laar, J.; Máxima Medical Center, Department of Obstetrics &          |
| 21 | Gynaecology                                                              |
| 22 | Wouters-van Poppel, P.; Máxima Medical Center, Department of Internal    |
| 23 | Medicine                                                                 |
| 24 | Sanson-van Praag, M.; Meander Medical Center, Department of Internal     |
| 25 | Medicine                                                                 |
| 26 | van den Akker, E.; OLVG, Department of Obstetrics & Gynaecology          |
| 27 | Brouwer, C.; OLVG, Department of Internal Medicine                       |
| 28 | Hermesen, B.; OLVG, Department of Obstetrics & Gynaecology               |
| 29 | Potter van Loon, B.; OLVG, Department of Internal Medicine               |
| 30 | van der Heijden, O.; Radboud University Medical Center Nijmegen,         |
| 31 | Department of Obstetrics & Gynaecology                                   |
| 32 | de Galan, B.; Radboud University Medical Center Nijmegen, Department     |
| 33 | of Internal Medicine                                                     |
| 34 | van Leeuwen, M.; Reinier de Graaf Hospital, Department of Obstetrics &   |
| 35 | Gynaecology                                                              |
| 36 | Wijbenga, J.; Reinier de Graaf Hospital, Department of Internal Medicine |
| 37 | de Boer, K.; Rijnstate Hospital, Department of Obstetrics & Gynaecology  |
| 38 | van Bon, A.; Rijnstate Hospital, Department of Internal Medicine         |
| 39 | van der Made, F.; Franciscus Gasthuis & Vlietland, Department of         |
| 40 | Obstetrics & Gynaecology                                                 |
| 41 | Eskes, S.; Franciscus Gasthuis & Vlietland, Department of Internal       |
| 42 | Medicine                                                                 |
| 43 | Zandstra, M.; Spaarne Gasthuis, Department of Obstetrics &               |
| 44 | Gynaecology                                                              |
| 45 | van Houtum, W.; Spaarne Gasthuis, Department of Internal Medicine        |
| 46 | Braams-Lisman, B.; Tergooi, Department of Obstetrics & Gynaecology       |
| 47 | Daemen-Gubbels, C.; Tergooi, Department of Internal Medicine             |
| 48 | Wouters, Maurice ; Amsterdam UMC, VU University Medical Center,          |
| 49 | Department of Obstetrics & Gynaecology                                   |
| 50 | IJzerman, R.; Amsterdam UMC, VU University Medical Center,               |
| 51 | Department of Internal Medicine                                          |
| 52 | Mensing van Charante, N.; Dijklander Hospital, Department of Obstetrics  |
| 53 | & Gynaecology                                                            |
| 54 | Zwertbroek, R.; Dijklander Hospital, Department of Internal Medicine     |
| 55 | Bosmans, J; VU University Amsterdam, Department of Health Sciences,      |
| 56 | Faculty of Science                                                       |
| 57 | Evers, I.; Meander Medical Center, Department of Obstetrics &            |
| 58 | Gynaecology                                                              |
| 59 | Mol, Ben; School of Medicine, Monash University, Melbourne, Australia,   |
| 60 | Department of Obstetrics and Gynaecology                                 |
|    | de Valk, H.; University Medical Center Utrecht, Utrecht University,      |
|    | Department of Internal Medicine & Endocrinology                          |
|    | Groenendaal, Floris ; University Medical Center Utrecht, Utrecht         |
|    | University, Department of Neonatology                                    |

|           |                                                                                                                                                                                                                                                                                                                                                                                                                                                                                                                                                                                                                                                                                                     |
|-----------|-----------------------------------------------------------------------------------------------------------------------------------------------------------------------------------------------------------------------------------------------------------------------------------------------------------------------------------------------------------------------------------------------------------------------------------------------------------------------------------------------------------------------------------------------------------------------------------------------------------------------------------------------------------------------------------------------------|
|           | Naaktgeboren, CA ; University Medical Center Utrecht, Utrecht University, Julius Center for Health Sciences & Primary Care<br>Painter, Rebecca; Amsterdam University Medical Centers, University of Amsterdam, Department of Obstetrics & Gynaecology<br>de Vries, Hans; Amsterdam University Medical Centers, University of Amsterdam, Department of Internal Medicine<br>Franx, Arie; University Medical Center Utrecht, Utrecht University, Department of Obstetrics & Gynaecology<br>van Rijn, Bas; University Medical Center Utrecht, Utrecht University, Department of Obstetrics & Gynaecology; Erasmus MC University Medical Center Rotterdam, Department of Obstetrics & Prenatal Medicine |
| Keywords: | Diabetes in pregnancy < DIABETES & ENDOCRINOLOGY, Clinical trials < THERAPEUTICS, Maternal medicine < OBSTETRICS                                                                                                                                                                                                                                                                                                                                                                                                                                                                                                                                                                                    |
|           |                                                                                                                                                                                                                                                                                                                                                                                                                                                                                                                                                                                                                                                                                                     |

SCHOLARONE™  
Manuscripts

# The SUGAR-DIP trial: oral medication strategy versus insulin for diabetes in pregnancy, study protocol for a multicenter, open label, non-inferiority, randomized controlled trial

1. L. de Wit, M.D., Department of Obstetrics and Gynaecology, University Medical Center Utrecht, Utrecht University, Lundlaan 6, 3508 AB, Utrecht, the Netherlands. [l.dewit-3@umcutrecht.nl](mailto:l.dewit-3@umcutrecht.nl)
2. D. Rademaker, M.D., Department of Obstetrics and Gynaecology, Amsterdam University Medical Centers, University of Amsterdam, Meibergdreef 9, 1105 AZ, Amsterdam, the Netherlands. [d.rademaker@amc.uva.nl](mailto:d.rademaker@amc.uva.nl)
3. D.N. Voormolen, M.D. Ph.D., Department of Obstetrics and Gynaecology, University Medical Center Utrecht, Utrecht University, Lundlaan 6, 3508 AB, Utrecht, the Netherlands. [d.p.vanmunster-2@umcutrecht.nl](mailto:d.p.vanmunster-2@umcutrecht.nl)
4. B.M.C. Akerboom, M.D., Department of Obstetrics and Gynaecology, Albert Schweitzer Hospital, Albert Schweitzerplaats 25, 3318 AT, Dordrecht, the Netherlands. [b.akerboom@asz.nl](mailto:b.akerboom@asz.nl)
5. R.M. Kiewiet-Kemper, M.D. Ph.D., Department of Internal Medicine, Albert Schweitzer Hospital, Albert Schweitzerplaats 25, 3318 AT, Dordrecht, the Netherlands. [r.kiewiet@asz.nl](mailto:r.kiewiet@asz.nl)
6. M.R. Soeters, M.D. Ph.D., Department of Endocrinology and Metabolism, Amsterdam University Medical Centers, University of Amsterdam, Meibergdreef 9, 1105 AZ, Amsterdam, the Netherlands. [m.r.soeters@amc.uva.nl](mailto:m.r.soeters@amc.uva.nl)
7. M.A.L. Verwij-Didden, M.D., Department of Obstetrics and Gynaecology, Bernhoven Hospital, Nistelrodeseweg 10, 5406 PT, Uden, the Netherlands. [m.verwij@bernhoven.nl](mailto:m.verwij@bernhoven.nl)
8. F. Assouiki, M.D., Department of Internal Medicine, Bernhoven Hospital, Nistelrodeseweg 10, 5406 PT, Uden, the Netherlands. [f.assouiki@bernhoven.nl](mailto:f.assouiki@bernhoven.nl)
9. D.H. Schippers, M.D., Department of Obstetrics and Gynaecology, Canisius Wilhelmina Hospital, Weg door Jonkerbos 100, 6532 DZ, Nijmegen, the Netherlands. [d.schippers@cwz.nl](mailto:d.schippers@cwz.nl)
10. M.A.R. Vermeulen, M.D. Ph.D., Department of Internal Medicine, Canisius Wilhelmina Hospital, Weg door Jonkerbos 100, 6532, DZ, Nijmegen, the Netherlands. [mar.vermeulen@cwz.nl](mailto:mar.vermeulen@cwz.nl)
11. S.M.I. Kuppens, M.D. Ph.D., Department of Obstetrics and Gynaecology, Catharina Hospital, Michelangelolaan 2, 5623 EJ, Eindhoven, the Netherlands. [simone.kuppens@catharinaziekenhuis.nl](mailto:simone.kuppens@catharinaziekenhuis.nl)
12. M.M. Oosterwerff, M.D. Ph.D., Department of Internal Medicine, Catharina Hospital, Michelangelolaan 2, 5623 EJ, Eindhoven, the Netherlands. [mirjam.oosterwerff@catharinaziekenhuis.nl](mailto:mirjam.oosterwerff@catharinaziekenhuis.nl)

13. J.J. Zwart, M.D. Ph.D., Department of Obstetrics and Gynaecology, Deventer Hospital, Nico Bolkesteinlaan 75, 7416 SE, Deventer, the Netherlands. [j.zwart@dz.nl](mailto:j.zwart@dz.nl)
14. M.J.M. Diekman, M.D. Ph.D., Department of Internal Medicine, Deventer Hospital, Nico Bolkesteinlaan 75, 7416 SE, Deventer, the Netherlands. [m.j.m.diekman@dz.nl](mailto:m.j.m.diekman@dz.nl)
15. T.E. Vogelvang, M.D. Ph.D., Department of Obstetrics and Gynaecology, Diaconessenhuis Utrecht, Bosboomstraat 1, 3582 KE, Utrecht, the Netherlands. [tvogelvang@diakhuis.nl](mailto:tvogelvang@diakhuis.nl)
16. P.R.J. Gallas, M.D. Ph.D., Department of Internal Medicine, Diaconessenhuis Utrecht, Bosboomstraat 1, 3582 KE, Utrecht, the Netherlands. [rgallas@diakhuis.nl](mailto:rgallas@diakhuis.nl)
17. S. Galjaard, M.D. Ph.D., Department of Obstetrics and Prenatal Medicine, Erasmus MC University Medical Center Rotterdam, Doctor Molewaterplein 40, 3015 GD, Rotterdam, the Netherlands. [s.galjaard@erasmusmc.nl](mailto:s.galjaard@erasmusmc.nl)
18. W. Visser, M.D. Ph.D., Department of Obstetrics and Prenatal Medicine, Erasmus MC University Medical Center Rotterdam, Doctor Molewaterplein 40, 3015 GD, Rotterdam, the Netherlands. [willy.visser@erasmusmc.nl](mailto:willy.visser@erasmusmc.nl)
19. N. Horree, M.D. Ph.D., Department of Obstetrics and Gynaecology, Flevoziekenhuis, Hospitaalweg 1, 1315 RA, Almere, the Netherlands. [nhorree@flevoziekenhuis.nl](mailto:nhorree@flevoziekenhuis.nl)
20. T.K. Klooker, M.D. Ph.D., Department of Internal Medicine, Flevoziekenhuis, Hospitaalweg 1, 1315 RA, Almere, the Netherlands. [tklooker@flevoziekenhuis.nl](mailto:tklooker@flevoziekenhuis.nl)
21. R. Laan, M.D., Department of Obstetrics and Gynaecology, Gelderse Vallei Hospital, Willy Brandtlaan 10, 6716 RP, Ede, the Netherlands. [laanr@zgv.nl](mailto:laanr@zgv.nl)
22. R. Heijligenberg, M.D. Ph.D., Department of Internal Medicine, Gelderse Vallei Hospital, Willy Brandtlaan 10, 7616 RP, Ede, the Netherlands. [heijligenbergr@zgv.nl](mailto:heijligenbergr@zgv.nl)
23. A.J.M. Huisjes, M.D., Department of Obstetrics and Gynaecology, Gelre Hospitals, Albert Schweitzerlaan 31, 7334 DZ, Apeldoorn, the Netherlands. [a.huisjes@gelre.nl](mailto:a.huisjes@gelre.nl)
24. T. van Bommel, M.D. Ph.D., Department of Internal Medicine, Gelre Hospitals, Albert Schweitzerlaan 31, 7334 DZ, Apeldoorn, the Netherlands. [t.van.bommel@gelre.nl](mailto:t.van.bommel@gelre.nl)
25. C.A. van Meir, M.D. Ph.D., Department of Obstetrics and Gynaecology, Groene Hart Hospital, Bleulandweg 10, 2803 HH, Gouda, the Netherlands. [claudia.van.meir@ghz.nl](mailto:claudia.van.meir@ghz.nl)
26. A.W. van den Beld, M.D. Ph.D., Department of Internal Medicine, Groene Hart Hospital, Bleulandweg 10, 2803 HH, Gouda, the Netherlands. [Annewieke.van.den.beld@ghz.nl](mailto:Annewieke.van.den.beld@ghz.nl)
27. W. Hermes, M.D. Ph.D., Department of Obstetrics and Gynaecology, Haaglanden Medical Center, Lijnbaan 32, 2512 VA, the Hague, the Netherlands. [w.hermes@haaglandenmc.nl](mailto:w.hermes@haaglandenmc.nl)

- 1  
2  
3  
4  
5  
6  
7  
8  
9  
10  
11  
12  
13  
14  
15  
16  
17  
18  
19  
20  
21  
22  
23  
24  
25  
26  
27  
28  
29  
30  
31  
32  
33  
34  
35  
36  
37  
38  
39  
40  
41  
42  
43  
44  
45  
46  
47  
48  
49  
50  
51  
52  
53  
54  
55  
56  
57  
58  
59  
60
28. S. Vidarsdottir, M.D. Ph.D., Department of Internal Medicine, Haaglanden Medical Center, Lijnbaan 32, 2512 VA, the Hague, the Netherlands. [s.johannssonvidarsdottir@haaglandenmc.nl](mailto:s.johannssonvidarsdottir@haaglandenmc.nl)
29. A.G. Veldhuis-Vlug, M.D. Ph.D., Department of Internal Medicine, Medical Center Jan van Goyen, Jan van Goyenkade 1, 1075 HN, Amsterdam, the Netherlands. [aveldhuis@jvg.nl](mailto:aveldhuis@jvg.nl)
30. R.C. Dullemond, M.D., Department of Obstetrics and Gynaecology, Jeroen Bosch Hospital, Henri Dunantstraat 1, 5223 GZ, 's-Hertogenbosch, the Netherlands. [r.dullemond@jbz.nl](mailto:r.dullemond@jbz.nl)
31. H.J. Jansen, M.D. Ph.D., Department of Internal Medicine, Jeroen Bosch Hospital, Henri Dunantstraat 1, 5223 GZ, 's-Hertogenbosch, the Netherlands, [h.jansen@jbz.nl](mailto:h.jansen@jbz.nl)
32. M. Sueters, M.D. Ph.D., Department of Obstetrics and Gynaecology, Leiden University Medical Center, Albinusdreef 2, 2333 ZA, Leiden, the Netherlands. [m.sueters@lumc.nl](mailto:m.sueters@lumc.nl)
33. E.J.P. de Koning, M.D. Ph.D., Department of Medicine, Leiden University Medical Center, Albinusdreef 2, 2333 ZA, Leiden, the Netherlands. [e.dekoning@lumc.nl](mailto:e.dekoning@lumc.nl)
34. J.O.E.H. van Laar, M.D. Ph.D., Department of Obstetrics and Gynaecology, Máxima Medical Center, De Run 4600, 5504 DB, Veldhoven, the Netherlands. [judith.van.laar@mmc.nl](mailto:judith.van.laar@mmc.nl)
35. P. Wouters-van Poppel, M.D. Ph.D., Department of Internal Medicine, Máxima Medical Center, De Run 4600, 5504 DB, Veldhoven, the Netherlands. [Pleun.van.poppel@mmc.nl](mailto:Pleun.van.poppel@mmc.nl)
36. M.E. Sanson-van Praag, M.D. Ph.D., Department of Internal Medicine, Meander Medical Center, Maatweg 3, 3813 TZ, Amersfoort, the Netherlands. [me.sanson@meandermc.nl](mailto:me.sanson@meandermc.nl)
37. E.S. van den Akker, M.D. Ph.D., Department of Obstetrics and Gynaecology, OLVG, Oosterpark 9, 1091 AC, Amsterdam, the Netherlands. [e.s.a.vandenakker@olvg.nl](mailto:e.s.a.vandenakker@olvg.nl)
38. C.B. Brouwer, M.D. Ph.D., Department of Internal Medicine, OLVG, Oosterpark 9, 1091 AC, Amsterdam, the Netherlands. [c.b.brouwer@olvg.nl](mailto:c.b.brouwer@olvg.nl)
39. B.B. Hermsen, M.D. Ph.D., Department of Obstetrics and Gynaecology, OLVG, Jan Tooropstraat 164, 1061 AE, Amsterdam, the Netherlands. [b.hermsen@olvg.nl](mailto:b.hermsen@olvg.nl)
40. B.J. Potter van Loon, M.D. Ph.D., Department of Internal Medicine, OLVG, Jan Tooropstraat 164, 1061 AE, Amsterdam, the Netherlands. [b.pottervanloon@olvg.nl](mailto:b.pottervanloon@olvg.nl)
41. O.W.H. van der Heijden, M.D. Ph.D., Department of Obstetrics and Gynaecology, Radboud University Medical Center, Geert Grooteplein-Zuid 10, 6525 GA, Nijmegen, the Netherlands. [Olivier.vanderheijden@radboudumc.nl](mailto:Olivier.vanderheijden@radboudumc.nl)
42. B. de Galan, M.D. Ph.D., Department of Internal Medicine, Radboud University Medical Center, Geert Grooteplein-Zuid 10, 6525 GA, Nijmegen, the Netherlands. [Bastiaan.degalan@radboudumc.nl](mailto:Bastiaan.degalan@radboudumc.nl)

- 1  
2  
3  
4  
5  
6  
7  
8  
9  
10  
11  
12  
13  
14  
15  
16  
17  
18  
19  
20  
21  
22  
23  
24  
25  
26  
27  
28  
29  
30  
31  
32  
33  
34  
35  
36  
37  
38  
39  
40  
41  
42  
43  
44  
45  
46  
47  
48  
49  
50  
51  
52  
53  
54  
55  
56  
57  
58  
59  
60
43. M. van Leeuwen, M.D. Ph.D., Department of Obstetrics and Gynaecology, Reinier de Graaf Hospital, Reinier de Graafweg 5, 2625 AD, Delft, the Netherlands. [Marsha.vanleeuwen@rdgg.nl](mailto:Marsha.vanleeuwen@rdgg.nl)
  44. J.A. Wijbenga, M.D. Ph.D., Department of Internal Medicine and Gynaecology, Reinier de Graaf Hospital, Reinier de Graafweg 5, 2625 AD, Delft, the Netherlands. [A.wijbenga@rdgg.nl](mailto:A.wijbenga@rdgg.nl)
  45. K. de Boer, M.D. Ph.D., Department of Obstetrics and Gynaecology, Rijnstate Hospital, Wagnerlaan 55, 6815 AD, Arnhem, the Netherlands. [kdeboer@rijnstate.nl](mailto:kdeboer@rijnstate.nl)
  46. A. C. Van Bon, M.D. Ph.D., Department of Internal Medicine, Rijnstate Hospital, Wagnerlaan 55, 6815 AD, Arnhem, the Netherlands. [acvanbon@rijnstate.nl](mailto:acvanbon@rijnstate.nl)
  47. F.W. van der Made, M.D., Department of Obstetrics and Gynaecology, Franciscus Gasthuis & Vlietland, Kleiweg 500, 3045 PM, Rotterdam, the Netherlands. [f.vandermade@sfg.nl](mailto:f.vandermade@sfg.nl)
  48. S.A. Eskes, M.D. Ph.D., Department of Internal Medicine, Franciscus Gasthuis & Vlietland, Kleiweg 500, 3045 PM, Rotterdam, the Netherlands. [s.eskes@franciscus.nl](mailto:s.eskes@franciscus.nl)
  49. M. Zandstra, M.D., Department of Obstetrics and Gynaecology, Spaarne Gasthuis, Boerhaavelaan 22, 2035 RC, Haarlem, the Netherlands. [mzandstra@spaarnegasthuis.nl](mailto:mzandstra@spaarnegasthuis.nl)
  50. W.H. van Houtum, M.D. Ph.D., Department of Internal Medicine, Spaarne Gasthuis, Boerhaavelaan 22, 2035 RC, Haarlem, the Netherlands. [wvanhoutum@spaarnegasthuis.nl](mailto:wvanhoutum@spaarnegasthuis.nl)
  51. B.A.M. Braams-Lisman, M.D. Ph.D., Department of Obstetrics and Gynaecology, Tergooi, Rijkstraatweg 1, 1261 AN, Blaricum, the Netherlands. [Bbraams-lisman@tergooi.nl](mailto:Bbraams-lisman@tergooi.nl)
  52. C.R.G.M. Daemen-Gubbels, M.D., Department of Internal Medicine, Tergooi, Rijkstraatweg 1, 1261 AN, Blaricum, the Netherlands. [cdaemen@tergooi.nl](mailto:cdaemen@tergooi.nl)
  53. M.G.A.J. Wouters, M.D. Ph.D., Department of Obstetrics and Gynaecology, Amsterdam UMC, VU University Medical Center, de Boelelaan 1117, 1081 HV, Amsterdam, the Netherlands. [mgaj.wouters@vumc.nl](mailto:mgaj.wouters@vumc.nl)
  54. R.G. IJzerman, M.D. Ph.D., Diabetes Center, Department of Internal Medicine, Amsterdam UMC, VU University Medical Center, de Boelelaan 1117, 1081 HB, Amsterdam, the Netherlands. [rg.ijzerman@vumc.nl](mailto:rg.ijzerman@vumc.nl)
  55. N.A. Mensing van Charante, M.D., Department of Obstetrics and Gynaecology, Dijklander Hospital, Maelsonstraat 3, 1624 NP, Hoorn, the Netherlands. [n.a.mensingvancharante@westfriesgasthuis.nl](mailto:n.a.mensingvancharante@westfriesgasthuis.nl)
  56. R. Zwertbroek, M.D., Department of Internal Medicine, Dijklander Hospital, Maelsonstraat 3, 1624 NP, Hoorn, the Netherlands. [r.zwertbroek@westfriesgasthuis.nl](mailto:r.zwertbroek@westfriesgasthuis.nl)
  57. J.E. Bosmans, Ph.D., Department of Health Sciences, Faculty of Science, Vrije Universiteit Amsterdam, Amsterdam Public Health Research Institute, Amsterdam, the Netherlands. De Boelelaan 1081, 1081 BT Amsterdam, the Netherlands. [j.e.bosmans@vu.nl](mailto:j.e.bosmans@vu.nl)



- 1  
2  
3 58. I.M. Evers, M.D. Ph.D., Department of Obstetrics and Gynaecology, Meander Medical Center,  
4 Maatweg 3, 3813 TZ, Amersfoort, the Netherlands. [im.evers@meandermc.nl](mailto:im.evers@meandermc.nl)  
5  
6  
7 59. B.W.J. Mol, M.D. Ph.D., Department of Obstetrics and Gynaecology, Monash University, Monash  
8 Medical Centre 246, Clayton Road Clayton, Victoria 3168, Australia. [ben.mol@monash.edu](mailto:ben.mol@monash.edu)  
9  
10 60. H.W. de Valk, M.D. Ph.D., Department of Internal Medicine and Endocrinology, University Medical  
11 Center Utrecht, Utrecht University, Lundlaan 6, 3508 AB, Utrecht, the Netherlands.  
12 [h.w.devalk@umcutrecht.nl](mailto:h.w.devalk@umcutrecht.nl)  
13  
14 61. F. Groenendaal, M.D. Ph.D., Department of Neonatology, University Medical Center Utrecht,  
15 Utrecht University, Lundlaan 6, 3508 AB, Utrecht, the Netherlands. [f.groenendaal@umcutrecht.nl](mailto:f.groenendaal@umcutrecht.nl)  
16  
17 62. C.A. Naaktgeboren, Ph.D., Julius Center for Health Sciences and Primary Care, University Medical  
18 Center Utrecht, Utrecht University, Heidelberglaan 100, 3584 CX, Utrecht, the Netherlands.  
19 [c.naaktgeboren@umcutrecht.nl](mailto:c.naaktgeboren@umcutrecht.nl)  
20  
21 63. R.C. Painter, M.D. Ph.D., Department of Obstetrics and Gynaecology, Amsterdam University  
22 Medical Centers, University of Amsterdam, Meibergdreef 9, 1105 AZ, Amsterdam, the  
23 Netherlands. [r.c.painter@amc.uva.nl](mailto:r.c.painter@amc.uva.nl)  
24  
25 64. J.H. DeVries, M.D. Ph.D., Department of Internal Medicine and Endocrinology, Amsterdam  
26 University Medical Centers, University of Amsterdam, Meibergdreef 9, 1105 AZ, Amsterdam, the  
27 Netherlands. [j.h.devries@amc.uva.nl](mailto:j.h.devries@amc.uva.nl)  
28  
29 65. A. Franx, M.D., Ph.D., Department of Obstetrics and Gynaecology, University Medical Center  
30 Utrecht, Utrecht University, Lundlaan 6, 3508 AB, Utrecht, the Netherlands. [a.franx-  
31 2@umcutrecht.nl](mailto:a.franx-2@umcutrecht.nl)  
32  
33 66. B.B. van Rijn, M.D. Ph.D., Department of Obstetrics and Gynaecology, University Medical Center  
34 Utrecht, Utrecht University, Lundlaan 6, 3508 AB, Utrecht, the Netherlands. Department of  
35 Obstetrics and Prenatal Medicine, Erasmus MC University Medical Center Rotterdam, Doctor  
36 Molewaterplein 40, 3015 GD, Rotterdam, the Netherlands. [b.vanrijn@erasmusmc.nl](mailto:b.vanrijn@erasmusmc.nl)  
37  
38  
39  
40  
41  
42

**Corresponding author**

43 B.B. van Rijn, M.D., Ph.D.  
44 Department of Obstetrics & Prenatal Medicine  
45 Erasmus MC University Medical Center Rotterdam  
46 Doctor Molewaterplein 40  
47 3015 GD, Rotterdam, the Netherlands  
48 [b.vanrijn@erasmusmc.nl](mailto:b.vanrijn@erasmusmc.nl)  
49  
50  
51  
52

53 **Word count:** 3886 (excluding title page, abstract and references)  
54  
55  
56  
57  
58  
59  
60

## ABSTRACT

**Introduction:** In women with gestational diabetes mellitus (GDM) requiring pharmacotherapy, insulin was the established first-line treatment. More recently oral glucose lowering drugs (OGLDs) have gained popularity as a patient-friendly, less expensive, and safe alternative. Monotherapy with metformin or glibenclamide (glyburide) is incorporated in several international guidelines. In women who do not reach sufficient glucose control with OGLD monotherapy, usually insulin is added, either with or without continuation of OGLDs. No reliable data from clinical trials, however, is available on the effectiveness of a treatment strategy using all three agents: metformin, glibenclamide, and insulin, in a stepwise approach, compared with insulin-only therapy for improving pregnancy outcomes. In this trial we aim to assess the clinical effectiveness, cost-effectiveness and patient experience of a stepwise combined OGLD treatment protocol, compared to conventional insulin-based therapy for GDM.

**Methods:** The SUGAR-DIP trial is an open label, multicenter randomized controlled non-inferiority trial. Participants are women with GDM who do not reach target glycemic control with modification of diet, between 16-34 weeks of gestation. Participants will be randomized to either treatment with OGLDs, starting with metformin and supplemented as needed with glibenclamide, or randomized to treatment with insulin. In women who do not reach target glycemic control with combined metformin and glibenclamide, glibenclamide will be substituted with insulin, while continuing metformin. The primary outcome will be the incidence of large-for-gestational-age infants (birth weight >90<sup>th</sup> percentile). Secondary outcome measures are maternal diabetes-related endpoints, obstetric complications, neonatal complications and cost-effectiveness analysis. Outcomes will be analyzed according to the intention-to-treat principle.

**Ethics and dissemination:** The study protocol was approved by the Ethics Committee of the Utrecht University Medical Center. Approval by the boards of management for all participating hospitals will be obtained. Trial results will be submitted for publication in peer-reviewed journals.

**Trial registration:** Netherlands Trial Registry NTR6134 (November 2016).

**Keywords:** gestational diabetes mellitus, oral glucose lowering drugs, antihyperglycemic agents, antidiabetic medication, metformin, glyburide, glibenclamide, insulin, randomized controlled trial, large-for-gestational-age.

1  
2  
3 **Article summary:**  
4  
5  
6  
7

8 **Strengths and limitations of this study**  
9

- 10 - This is the first open-label randomized controlled trial that directly compares a step-wise  
11 treatment protocol using a combination of oral glucose lowering drugs (OGLDs) to  
12 insulin as a first-line treatment for GDM not responding to diet  
13  
14 - The randomized multi-center design minimizes the risk of bias and increases  
15 generalizability of the results  
16  
17 - Variation in diagnostic thresholds and treatment targets for GDM may need to be  
18 addressed to assess the value of this strategy across different populations  
19  
20  
21  
22  
23  
24  
25  
26  
27  
28  
29  
30  
31  
32  
33  
34  
35  
36  
37  
38  
39  
40  
41  
42  
43  
44  
45  
46  
47  
48  
49  
50  
51  
52  
53  
54  
55  
56  
57  
58  
59  
60

## INTRODUCTION:

The prevalence of gestational diabetes mellitus (GDM) is rising and currently affects approximately 5-10% of all pregnancies.[1,2] GDM carries significant perinatal risks for pregnancy and childbirth, such as large-for-gestational-age infants, stillbirth, shoulder dystocia, obstructed labor, preeclampsia and neonatal hypoglycemia.[3–6] In addition, increasing concern exists about the impact of GDM on offspring development and associated long-term risks for obesity and chronic disease in children born to mothers with GDM.[7,8]

The rising number of women diagnosed with GDM requiring treatment is increasingly putting pressure on health care resources. Effective treatment for GDM treatment requires a multidisciplinary approach by endocrinologists, obstetricians and diabetes nurse specialists. Current treatment of GDM focuses on achieving optimal glycemic control. When blood glucose levels, usually based on self-monitoring, fall outside the target range despite lifestyle- and dietary advice, treatment with antihyperglycemic medication is indicated.[9,10] As pharmacologic treatment subcutaneous insulin injections have traditionally been used as first-choice treatment for GDM and is still advocated in many, but not all, guidelines.[11–13] In recent years, clinical research and experience with oral glucose lowering drugs (OGLDs) has shown promising results as a treatment alternative that may substitute insulin in many women.[14,15]

Metformin and glibenclamide (glyburide) are the OGLDs most studied for diabetes in pregnancy. Both are already widely used in the treatment of GDM and accepted as a safe first-line pharmacological treatment option in several guidelines.[16–19] A 2014 retrospective cohort study from the United States showed that the use of glibenclamide had increased from 7.4% in 2000 to 64.5% in 2011, becoming the most common treatment for GDM requiring pharmacotherapy in 2007.[17] In the United Kingdom, incorporated in the NICE guidelines (National Institute for Health and Care Excellence, UK), metformin is the first choice treatment, supplemented with insulin if needed.[20] Insulin is offered to women if metformin is contraindicated or unacceptable to the patient, or target glucose values are not met with

1  
2  
3 metformin only. The NICE guidelines state that glibenclamide could be considered an option for  
4 women in whom blood glucose targets are not achieved with metformin, but decline insulin  
5 therapy, or for those who cannot tolerate metformin. A recent statement by the Society of  
6 Maternal-Fetal Medicine (SMFM) Committee further endorses OGLDs as a reasonable and safe  
7 first-line pharmacologic treatment in GDM.[21] In contrast, in the Netherlands, insulin has  
8 remained the drug of choice in the majority of hospitals.  
9  
10  
11  
12  
13  
14  
15

16 Two 2017 Cochrane Reviews on 11 and 53 studies (1487, and 7381 women) concluded that due  
17 to insufficient high-quality evidence no single agent is superior in the treatment of GDM.[22,23]  
18 And although the use of OGLDs is widespread, there is an ongoing discussion on which drug  
19 should be first line treatment after lifestyle- and dietary interventions.[24] Both insulin and oral  
20 agents have advantages and disadvantages. Insulin is safe and effective, however is considered  
21 burdensome by pregnant women, requires intensive glucose monitoring, and is associated with  
22 episodes of maternal hypoglycemia.[25] OGLDs are less costly, less burdensome and associated  
23 with higher patient satisfaction.[15,18,26–28] Metformin has the advantage over insulin that  
24 hypoglycemic events do not occur, but it is less potent when compared to glibenclamide, can  
25 cause gastro-intestinal side-effects and is possibly associated with more spontaneous preterm  
26 deliveries.[16] Glibenclamide, similar to insulin, is more potent in its glucose-lowering effect and  
27 may cause hypoglycemia in the mother and newborn.[14,29] And although intrauterine  
28 exposure to metformin or glibenclamide is not associated with congenital anomalies, much less  
29 is known about direct fetal metabolic effects and long-term effects on mothers and  
30 offspring.[30]  
31  
32  
33  
34  
35  
36  
37  
38  
39  
40  
41  
42  
43  
44

45 With current OGLD monotherapy, consisting of either metformin or glibenclamide, in women  
46 who do not reach glycemic control, prompting the need for additional measures, in general  
47 OGLDs are replaced by or supplemented with insulin. A combination of oral agents may be an  
48 interesting strategy for GDM treatment, however current evidence is insufficient to determine  
49 the optimal use of OGLDs. In a recent randomized controlled trial by Nachum *et al.* in 104  
50 women with GDM, powered for glycemic control, combination therapy of metformin and  
51  
52  
53  
54  
55  
56  
57  
58  
59  
60

1  
2  
3 glibenclamide decreased the need for additional insulin from 32% to 11% ( $p = 0.0002$ )  
4 compared to monotherapy.[31] Metformin as the first-line therapy combined with glibenclamide  
5 if needed was associated with the highest treatment success. These data support the need for a  
6 well-powered large scale randomized controlled trial to compare a step-wise approach  
7 combining metformin and glibenclamide to conventional insulin therapy to study effects on  
8 pregnancy outcomes.  
9  
10  
11  
12  
13  
14  
15

16 In the SUGAR-DIP trial, a multicenter randomized controlled trial, we aim to assess non-  
17 inferiority of treatment with metformin, and in case of insufficient glyceic control the addition  
18 of glibenclamide, compared to immediate insulin in the treatment of GDM. We expect that a  
19 proportion of patients will achieve glyceic control with metformin only. By adding  
20 glibenclamide in combined treatment with metformin, we expect to achieve glyceic control as  
21 good as by insulin, while maintaining the benefits and ease of a less burdensome treatment with  
22 oral medication. We will assess the clinical effectiveness, cost-effectiveness and patient  
23 experience of stepwise oral antihyperglycemic medication to treat GDM compared to  
24 conventional insulin-based treatment strategy.  
25  
26  
27  
28  
29  
30  
31  
32  
33

## 34 **METHODS:**

### 35 **Design and setting:**

36  
37  
38 The SUGAR-DIP trial is a multicenter non-inferiority randomized controlled trial (RCT). The study  
39 will be open label as oral drugs and insulin cannot be administered individually in a blinded way.  
40  
41 The study will be conducted within the setting of the Dutch Consortium for Healthcare  
42 Evaluation and Research in Obstetrics and Gynaecology – NVOG Consortium 2.0,[32] a  
43 collaborative network of all major hospitals in the Netherlands and the Dutch Society of  
44 Obstetrics and Gynaecology (NVOG) and performed by treatment teams generally consisting of  
45 an internist, a gynaecologist and diabetes nurses. In the preparation of the trial, the patient  
46 organisation Dutch Diabetes Association (Diabetes Vereniging Nederland) was involved and  
47 provided valuable input, representing the patient perspective in the study protocol. The trial was  
48  
49  
50  
51  
52  
53  
54  
55  
56  
57  
58  
59  
60

1  
2  
3 approved by the Medical Research Ethics Committee (MREC) of the UMC Utrecht. Trial reference  
4 number: 16-523/M. The trial is registered in the Netherlands Trial Registry on 29 November  
5 2016 under the number NTR6134.[33]  
6  
7  
8  
9

### 10 **Participants and eligibility criteria:**

11 Women diagnosed with GDM who have not reached target glycemic control with dietary and  
12 lifestyle adaptations and thus meet the criteria for additional treatment with antihyperglycemic  
13 medication between 16 to 34 weeks of gestation, will be eligible for inclusion. Target glycemic  
14 control is defined by the NVOG(Dutch College O&G) diabetes in pregnancy guideline as fasting  
15 glucose concentration  $\leq 5.3$  mmol/L, 1-hour postprandial  $\leq 7.8$  mmol/L or 2-hour postprandial  
16  $\leq 6.7$  mmol/L.[34]  
17  
18  
19  
20  
21  
22  
23  
24

25 The diagnosis of GDM is made according to Dutch national guidelines, using a 75-gram oral  
26 glucose tolerance test.[34] Due to a transition in diagnostic thresholds, both the WHO 1999  
27 (fasting  $\geq 7.0$  mmol/L or 2-hour postload  $\geq 7.8$  mmol/L) and WHO 2013 criteria (fasting  $\geq 5.1$   
28 mmol/L, 1-hour postload  $\geq 10.0$  or 2-hour postload  $\geq 8.5$  mmol/L) for venous plasma glucose  
29 values were used to diagnose GDM. Screening in the Netherlands is conducted according to a  
30 high risk strategy, and takes place in the second trimester (24-28 weeks) among pregnant  
31 women with one or more of the following risk factors are present: a history of GDM, BMI  $> 30$   
32 (kg/m<sup>2</sup>), a history of a neonate with a birth weight  $> 95^{\text{th}}$  percentile or  $> 4500$  grams, a first  
33 degree family member with diabetes, polycystic ovary syndrome, a history of an unexplained  
34 intra-uterine death or an ethnicity with higher diabetes risk (e.g. women from South-Asia, Indian  
35 descent / Surinamese, Afro-Caribbean, Middle-Eastern, Moroccan or Egyptian ethnicity). In case  
36 of a history of GDM in a previous pregnancy an OGTT as early as 16 weeks of gestation is  
37 recommended, to be repeated at 24-28 weeks if normal. An OGTT may also be performed in  
38 cases of suspected fetal macrosomia, polyhydramnios, or symptoms of polydipsia or polyuria.  
39  
40  
41  
42  
43  
44  
45  
46  
47  
48  
49  
50  
51

52 Additional inclusion criteria for the SUGAR-DIP trial are: (1) maternal age  $\geq 18$  years (2) singleton  
53 pregnancy (3) ability to understand the Dutch or English language and (4) ability to provide  
54  
55  
56  
57  
58  
59  
60

1  
2  
3 written informed consent. Patients who meet any of the following criteria are excluded from the  
4 study: (1) known pre-existing type 1 or type 2 diabetes mellitus (2) severe medical or psychiatric  
5 comorbidities (3) significant liver disease or renal insufficiency, or any other known condition  
6 with contraindications for the use of either metformin or glibenclamide (4) pregnancy with a  
7 fetus affected by major congenital birth defects and/or chromosomal abnormality.  
8  
9  
10  
11  
12  
13

#### 14 **Recruitment and randomisation:**

15  
16 Eligible women will be informed and invited to participate by either their diabetes care or  
17 obstetric care provider, i.e. physician, obstetrician, midwife, or diabetes nurse. Following  
18 counselling, written informed consent is obtained and participants are individually randomized  
19 to either stepwise OGLDs or insulin. Randomization is performed through a central web-based  
20 tool (Castor EDC, Ciwit B.V., the Netherlands and Castor Research Inc, USA), using a 1:1 ratio and  
21 block randomization with a variable block size of 4 and 6.  
22  
23  
24  
25  
26  
27  
28

#### 29 **Intervention and control:**

30  
31 Figure I. displays the stepwise treatment strategy for the intervention (OLGD) and control  
32 (insulin) group.  
33  
34  
35

#### 36 *Oral glucose lowering drugs (OGLDs):*

37  
38 In women allocated to the OGLD strategy, metformin is initiated with a starting dose of 500 mg  
39 once daily for 3 days, followed by an increase of 500 mg every 3 days to the final daily dose of  
40 2000 mg divided into 2 doses. In case of serious side effects (e.g. severe nausea, persistent  
41 vomiting or diarrhoea), the metformin dose can be lowered to the maximum dose tolerated with  
42 acceptable side effects. Participants are advised to take metformin during or shortly after a meal  
43 to reduce side effects. In case of insufficient glycemic control with metformin at the maximum  
44 (tolerated) dose, glibenclamide will be added at a starting dose of 2.5 mg once daily.  
45  
46  
47  
48  
49  
50  
51 Glibenclamide can be increased if glycemic goals are not met with increments of 2.5 mg every  
52 week, up to a maximum dose of 15 mg daily. In case of insufficient glycemic control with both  
53  
54  
55  
56  
57  
58  
59  
60



1  
2  
3 metformin and glibenclamide at the maximum doses, glibenclamide will be discontinued and  
4 replaced by insulin, while metformin will be continued.  
5  
6  
7

8  
9 *Insulin:*

10 Participants randomized to insulin treatment will receive insulin according to usual practice, i.e.  
11 in incremental doses until glycemic targets are met.[35] This includes both short- and long-  
12 acting insulin.  
13  
14  
15

16  
17  
18 **Study procedures:**

19  
20  
21 *Diabetes care:*

22 In all participants, a specialized diabetes nurse or internal medicine specialist will review  
23 glycemic control every 1-2 weeks using the following target values for glucose, as measured by  
24 capillary glucose self-testing: fasting  $\leq 5.3$  mmol/L, 1 hour postprandial  $\leq 7.8$  mmol/L and 2  
25 hours postprandial  $\leq 6.7$  mmol/L. If titration of medication requires more frequent feedback,  
26 participants will be given the option to contact their diabetes treatment specialist in between  
27 scheduled visits. All participants receive the usual instructions regarding hypoglycemic events  
28 (glucose  $<4.0$  mmol/L). A participant diary is used to document glucose values and medication  
29 use, and is reviewed at every visit. Frequency of self-monitoring will be discussed on an  
30 individual basis with the treating diabetes team. Weight is documented at study inclusion and at  
31 every subsequent visit. Blood sampling for glycated haemoglobin (HbA1c) is performed at study  
32 inclusion, at 30 weeks and at 36 weeks of pregnancy.  
33  
34  
35  
36  
37  
38  
39  
40  
41  
42  
43

44  
45 *Obstetric care:*

46 All participants will receive obstetrical care based on usual practice for gestational diabetes  
47 mellitus requiring pharmacological therapy. This includes assessment of fetal biometry at weeks  
48 26-28, 30-32 and 34-36 of pregnancy by measuring fetal abdominal circumference (AC), femur  
49 length (FL), head circumference (HC), estimated fetal weight (EFW) (Hadlock or similar) and  
50 amniotic fluid volume. The timing of delivery follows local protocol, based on national  
51  
52  
53  
54  
55  
56  
57  
58  
59  
60

1  
2  
3 guidelines.[34] Induction of labour around 38-39 weeks of gestation is generally recommended  
4 for women with GDM requiring medication. Both oral antihyperglycemic agents and insulin may  
5 be discontinued on the day of delivery in case of induced labor or as soon as labor is established  
6 after spontaneous onset. Monitoring of glucose levels during labor is advised.  
7  
8  
9

#### 10 11 12 *Neonatal care:*

13  
14 Neonatal glucose monitoring will be performed serially for up to 12-24 hours after delivery in  
15 accordance to local protocol in participating sites. We defined neonatal hypoglycemia as a  
16 plasma glucose concentration  $<2.6$  mmol/L and severe neonatal hypoglycemia as  $<2.0$   
17 mmol/L.[36] Time and plasma glucose values are documented as well as any NICU admission  
18 and interventions used to regulate neonatal glucoses.  
19  
20  
21  
22  
23

#### 24 25 *Postpartum:*

26  
27 Participants will attend routine obstetric and diabetes care provider appointments around 5-6  
28 weeks postpartum at which time glucose self-monitoring will be carried out to detect persistent  
29 postpartum hyperglycemia.  
30  
31  
32

### 33 34 **Outcome measures**

#### 35 36 *Primary outcome measure:*

37  
38 The primary outcome is a large-for-gestational-age (LGA) infant. Large-for-gestational-age is  
39 defined as a birth weight  $\geq 90^{\text{th}}$  percentile, using the Dutch Perinatal Registry (PRN) reference  
40 charts.[37]  
41  
42  
43

#### 44 45 *Secondary outcome measures*

46  
47 Secondary outcomes include maternal hypoglycemia (biochemical hypoglycemia  $<3.9$  mmol/L,  
48 symptomatic hypoglycemia, severe hypoglycemia prompting the need for help by another  
49 person and/or hospital admission for hypoglycemia), elective- and emergency Caesarean  
50 section, pregnancy related hypertensive disorders including Pregnancy Induced Hypertension  
51 (PIH) and preeclampsia (PE), preterm delivery (delivery  $<37$  weeks of gestation), postpartum  
52  
53  
54  
55  
56  
57

1  
2  
3 neonatal hypoglycemia (moderate: serum glucose <2.6 mmol/L, severe: serum glucose <2.0  
4 mmol/L), neonatal hyperbilirubinemia requiring phototherapy, neonatal Medium Care or  
5 Intensive Care admission and a cost-effectiveness analysis.  
6  
7  
8  
9

10 Furthermore, a number of maternal baseline characteristics, obstetric- and neonatal outcomes,  
11 diabetes-related endpoints, biomarkers and laboratory examinations will be assessed (*see*  
12 *supplement 1 and 2*).  
13  
14  
15

### 16 17 18 **Follow-up**

19 Details regarding outcomes, including maternal and neonatal hospital admissions or  
20 complications are recorded up to 6 weeks postpartum. Long-term follow-up of mother and child  
21 is not part of the initial trial, however participants will be informed about planned long-term  
22 follow-up and asked to provide additional personal information and contact details on the  
23 patient information and informed consent form at study inclusion.  
24  
25  
26  
27  
28  
29

### 30 31 **Patient perspective and treatment satisfaction:**

32 A custom made side-effects form will be used to monitor side effects, the actions taken because  
33 of side effects and to what extent participants were affected by the side effects. Treatment  
34 satisfaction is also measured around 36 weeks of pregnancy using the Diabetes Treatment  
35 Satisfaction Questionnaire (DTSQ), consisting of 8 questions regarding diabetes treatment and  
36 patient experience.[38,39] Two additional questions regarding side-effects and discomfort were  
37 provided by the copyright holder from a related treatment satisfaction measures for another  
38 condition, and added as items 9 and 10 of the DTSQ, to be analysed separately.[40]  
39  
40  
41  
42  
43  
44  
45  
46  
47

### 48 **Safety and monitoring:**

49 An independent Data and Safety Monitoring Board (DSMB) will be established to safeguard the  
50 interests of trial participants, assess the safety and efficacy of the interventions during the trial  
51 period and monitor the overall conduct of the clinical trial. An interim safety review is planned at  
52 300 included participants and will be carried out by an independent statistician.  
53  
54  
55  
56  
57

1  
2  
3 All serious adverse events (SAE) reported by the subject or observed by the investigator or staff  
4 will be recorded. SAE definitions and standards for expedited reporting follow the ICH GCP  
5 guidelines on safety reporting.[41] All SAEs will be reported to the accredited ethics committee  
6 that approved the protocol, according to the requirements of that committee.  
7  
8  
9

### 10 11 12 **Sample size:**

13  
14 The primary outcome measure, rate of LGA infants, is anticipated to occur in 20% of patients in  
15 both study groups, based on a Dutch study cohort.[42] We have set the non-inferiority limit at  
16 8%, which is equivalent to excluding a relative risk in the OGLD treatment compared with  
17 conventional insulin-based therapy greater than 1.4. With a one-sided significance level ( $\alpha$ ) of  
18 0.025 and a power of 0.8, the sample size is calculated at 393 patients in each arm. Accounting  
19 for a loss to follow-up of 3%, 810 patients are needed (405 per arm).  
20  
21  
22  
23  
24  
25

### 26 27 **Analyses and reporting of results:**

#### 28 *Primary and secondary outcomes:*

29  
30 Primary analysis of the RCT results will be according to the intention-to-treat principle. Missing  
31 data will be handled according to the complete-case analysis principle, based on the availability  
32 of the components needed to determine the primary endpoint. Results will be reported  
33 according to CONSORT guidelines, using the extension for non-inferiority trials. In case of  
34 substantial cross-over (>5%), a per protocol analysis is used additionally to the intention-to-  
35 treat analysis. Cross-over is defined as patients not receiving the treatment allocated by  
36 randomization (e.g. participant never started treatment, treatment is no longer necessary for  
37 instance due to improved dietary adaptations, side-effects, or stopping treatment shortly after  
38 randomization).  
39  
40  
41  
42  
43  
44  
45  
46  
47

48  
49 For the primary analysis, the non-inferiority of metformin/glibenclamide versus insulin for  
50 preventing large-for-gestational-age infants will be established when the upper bounds of the  
51 two-sided 95% confidence interval for the risk ratio is less than 1.4. Large-for-gestational-age  
52 will be defined as birth weight >90<sup>th</sup> percentile.[37] Results for the primary outcome will also be  
53  
54  
55  
56  
57

1  
2  
3 presented as absolute and relative risks (along with 95% confidence intervals (CI)) and numbers  
4 needed to treat (if applicable). Analyses will not be adjusted for any observed differences in  
5 baseline characteristics between the arms.  
6  
7  
8  
9

10 The secondary outcome measures will be analysed similar to the primary outcome measure.  
11 Categorical secondary outcomes will be assessed by comparing the event rates in the two  
12 groups using a chi-square test with a p-value of 0.05 and also by presenting absolute and  
13 relative risks. For continuous secondary outcomes, differences between groups will be assessed  
14 with the student's t-test if the outcome is normally distributed and with a non-parametric Mann-  
15 Whitney U test if skewed. These outcomes will be presented per group as means with standard  
16 deviation, geometric means with 95% CI, or as median with interquartile range, depending on  
17 distribution.  
18  
19  
20  
21  
22  
23  
24  
25  
26

#### 27 *Subgroup analyses:*

28 Subgroup analyses will be performed for women with and without a history of GDM, a family  
29 history of diabetes mellitus (first and/or second degree relative), BMI (normal weight,  
30 overweight, obese), according to severity of GDM (fasting and 2 hour OGTT glucose value by  
31 various diagnostic criteria and cut-offs), sex (neonate). Additionally, potential causes for  
32 treatment failure of metformin alone will also be explored. Within the patients receiving oral  
33 agents, the outcome rate will be compared between the patients whose blood glucose could be  
34 regulated by metformin alone and those patients who also required glibenclamide and even  
35 additional insulin. Patient characteristics between these groups will be compared to identify  
36 possible contributing factors to metformin treatment failure.  
37  
38  
39  
40  
41  
42  
43  
44  
45  
46

#### 47 *Economic evaluation:*

48 An economic evaluation will be conducted alongside the randomized controlled trial according  
49 to guidelines issued by the National Health Care Institute.[43] The EuroQuol questionnaire (EQ-  
50 5D-5L) for health status measures is used at time of study inclusion, 36 weeks of pregnancy and  
51 4-6 weeks postpartum.[44] Further Health Technology Assessment questionnaires are based on  
52  
53  
54  
55  
56  
57  
58  
59  
60

1  
2  
3 the iMTA PCQ (Productivity Cost Questionnaire) and MCQ (Medical Consumption  
4 Questionnaire), issued at 36 weeks of pregnancy and 4-6 weeks postpartum.[45,46] The  
5 statistical analysis for the economic evaluation will be done according to the intention-to-treat  
6 principle. Missing data will be imputed using multiple imputation. If OGLDs are non-inferior to  
7 insulin as hypothesized, a cost minimization analysis will be performed to investigate which  
8 intervention is associated with lower costs. If non-inferiority cannot be shown, a cost-  
9 effectiveness analysis will be performed. The costs will be analyzed from both a societal (i.e.  
10 healthcare costs, patient and family costs, and costs in other sectors) and healthcare perspective  
11 (i.e. only healthcare costs). In the cost minimization analysis the differences in costs between  
12 OGLDs and insulin will be evaluated using linear multilevel regression models with adjustment  
13 for covariates and effect modifiers if necessary. Bootstrapping with stratification for center will  
14 be done to estimate 95% confidence intervals around differences in costs. In the cost-  
15 effectiveness analysis cost and effect differences will be estimated using seemingly unrelated  
16 regression analyses while adjusting for confounders and effect modifiers if necessary.  
17  
18 Incremental cost-effectiveness ratios (ICERs) will be calculated by dividing the difference in mean  
19 total costs between the treatment groups by the difference in mean effects. Bootstrapping with  
20 stratification for center will be used to estimate uncertainty surrounding the ICERs. Uncertainty  
21 surrounding the ICERs will be graphically presented on cost-effectiveness planes. Cost-  
22 effectiveness acceptability curves showing the probability that the intervention is cost-effective  
23 in comparison with usual care for a range of different ceiling ratios will also be estimated.[47] A  
24 sensitivity analysis will be performed to investigate the robustness of the results to variation in  
25 the most influential cost parameters such as medication and time required for clinical consults.  
26  
27  
28  
29  
30  
31  
32  
33  
34  
35  
36  
37  
38  
39  
40  
41  
42  
43

#### 44 **Data handling:**

45  
46 Baseline data including patient demographics, obstetric and medical history, details regarding  
47 the pregnancy, delivery outcomes and diabetes treatment will be recorded using a web-based  
48 electronic case record form (eCRF) using Castor EDC. The full eCRF is provided as a  
49 supplemental file (*Supplement 2*). A study monitor will periodically visit participating centres,  
50 assessing quality of data and auditing trial conduct. Patient privacy will be ensured by allocation  
51  
52  
53  
54  
55  
56  
57  
58  
59  
60

of unique participant numbers, which will be used on all study documentation. The participant code is only available to the local investigator and research staff.

### **Ethics and dissemination**

This trial has been approved by the Medical Research Ethics Committee (MREC) of the UMC Utrecht. Trial reference number: 16-523/G-M-X. The MREC of the UMC Utrecht is accredited by the Central Committee on Research Involving Human Subjects (CCMO) since November 1999. For all participating hospitals and study sites approval by the boards of management will be obtained. The CCMO has issued a 'No grounds for non-acceptance' for the SUGAR-DIP trial. Research with a medicinal product must undergo an extra, marginal review alongside the review by the reviewing party (MREC). The competent authority (CCMO) checks if there are 'motivated objections' against the study. For this the European adverse reactions database (EudraVigilance) is checked for any previously reported suspected adverse reactions to the medicinal product, which could lead to unacceptable risks to the participating research subject. Furthermore, the CCMO is responsible as the competent authority for entering data into the European EudraCT database. EudraCT number for this trial: 2016-001401-16.

Changes to the study protocol are documented in amendments. Amendments are submitted for approval to the MREC. Major changes will be updated on the trial registration website.[33] The full study protocol, including amendments, is publically available on the study website.[48]

After completion of the trial the principal investigator will report on the results of the main study and submit a manuscript to a peer-reviewed medical journal. Supplementary analyses will be reported separately.

### **Author contributions:**

Study concept, trial design and study protocol: LW, DNV, JEB, IME, BWM, HWV, FG, CAN, RCP, JHD, AF, BBR

Acquisition of data: LW, DR, BMCA, RMKK, RCP, MRS, MALVD, FA, DHS, MARV, SMIK, MMO, JJZ, MJMD, TEV, PRJG, SG, WV, NH, TKK, RL, RH, AJMH, TB, CAM, AWB, WH, SV, AGVV, RCD, HJJ, MS, EJPK, JOEHL, PWP, IME, MESP, ESA, CBB, BBH, BJP, OWHH, BG, ML, JAW, KB, ACB, FWM, SAE, MZ, WHH, BAMBL, CRGMDG, MGAJW, RGIJ, NAMC, RZ

Analysis and interpretation of data: LW, DR, DNV, JEB, IME, BWM, HWV, FG, CAN, RCP, JHD, AF, BBR

Drafting of the manuscript: LW, DR, CAN, RCP, JHD, AF, BBR

1  
2  
3 Critical revision of the manuscript for important intellectual content: LW, DR, DNV, JEB, IME,  
4 BWM, HWV, FG, CAN, RCP, JHD, AF, BBR, BMCA, RMKK, MRS, MALVD, FA, DHS, MARV, SMIK,  
5 MMO, JJZ, MJMD, TEV, PRJG, SG, WV, NH, TTK, RL, RH, AJMH, TB, CAM, AWB, WH, SV, AGVV,  
6 RCD, HJJ, MS, EJPK, JOEHL, PWP, MESP, ESA, CBB, BBH, BJP, OWHH, BG, ML, JAW, KB, ACB, FWM,  
7 SAE, MZ, WHH, BAMBL, CRGMDG, MGAJW, RGIJ, NAMC, RZ

8 Study supervision: JHD, AF, BBR  
9  
10

### 11 **Trial Sponsor:**

12 Institution: University Medical Center Utrecht, Wilhelmina Children's Hospital

13 Principal investigator: Prof. Dr. A. Franx

14 Address: Lundlaan 6, 3584 EA, Utrecht, the Netherlands  
15  
16  
17

### 18 **Funding:**

19 The SUGAR-DIP trial and this work is investigator-driven and was supported by ZonMw (The  
20 Netherlands Organisation for Health Research and Development, the Hague), grant 80-83600-  
21 98-40001  
22  
23

### 24 **Competing interests:**

25 JHD sits on advisory boards for Novo Nordisk A/S

26 BWM is supported by a NHMRC Practitioner Fellowship (GNT1082548)

27 BWM reports consultancy for ObsEva, Merck KGaA and Guerbet  
28  
29  
30  
31  
32  
33  
34  
35  
36  
37  
38  
39  
40  
41  
42  
43  
44  
45  
46  
47  
48  
49  
50  
51  
52  
53  
54  
55  
56  
57  
58  
59  
60



## References

- 1 Zhu Y, Zhang C. Prevalence of Gestational Diabetes and Risk of Progression to Type 2 Diabetes: a Global Perspective. *Curr Diab Rep* 2016;**16**:7. doi:10.1007/s11892-015-0699-x
- 2 van Leeuwen M, Prins SM, de Valk HW, *et al.* Gestational diabetes mellitus: treatment reduces the risk of complications. *Ned Tijdschr Geneeskd* 2011;**155**:1–8.
- 3 Zeng Y-CC, Li M-JJ, Chen Y, *et al.* The use of glyburide in the management of gestational diabetes mellitus: a meta-analysis. *Adv Med Sci* 2014;**59**:95–101. doi:10.1016/j.advms.2014.03.001
- 4 The HAPO Study Cooperative Research Group, Metzger BE, Lowe LP, *et al.* Hyperglycemia and adverse pregnancy outcomes. *N Engl J Med* 2008;**358**:1991–2002. doi:10.1056/NEJMoa0707943
- 5 Xiong X, Saunders LDD, Wang FLL, *et al.* Gestational diabetes mellitus: prevalence, risk factors, maternal and infant outcomes. *Int J Gynaecol Obs* 2001;**75**:221–8. doi:10.1016/S0020-7292(01)00496-9
- 6 Voormolen DN, de Wit L, van Rijn BB, *et al.* Neonatal Hypoglycemia Following Diet-Controlled and Insulin-Treated Gestational Diabetes Mellitus. *Diabetes Care* 2018;**41**:1385–90. doi:10.2337/dc18-0048
- 7 Wouldes TA, Battin M, Coat S, *et al.* Neurodevelopmental outcome at 2 years in offspring of women randomised to metformin or insulin treatment for gestational diabetes. *Arch Dis Child Fetal Neonatal Ed* 2016;:F1–6. doi:10.1136/archdischild-2015-309602
- 8 Malcolm J. Through the looking glass: gestational diabetes as a predictor of maternal and offspring long-term health. *Diabetes Metab Res Rev* 2012;**28**:307–11. doi:10.1002/dmrr.2275
- 9 Crowther CA, Hiller JE, Moss JR, *et al.* Effect of treatment of gestational diabetes mellitus on pregnancy outcomes. *N Engl J Med* 2005;**352**:2477–86. doi:10.1056/NEJMoa042973
- 10 Landon MB, Spong CY, Thom E, *et al.* A multicenter, randomized trial of treatment for mild gestational diabetes. *N Engl J Med* 2009;**361**:1339–48. doi:10.1056/NEJMoa0902430
- 11 Committee on Practice Bulletins-Obstetrics. ACOG Practice Bulletin No. 190: Gestational Diabetes Mellitus. *Obs Gynecol* 2018;**131**:e49–64. doi:10.1097/AOG.0000000000002501
- 12 American Diabetes Association. 13. Management of Diabetes in Pregnancy: Standards of Medical Care in Diabetes-2018. *Diabetes Care* 2018;**41**:S137–43. doi:10.2337/dc18-S013
- 13 Wexler DJ, Powe CE, Barbour LA, *et al.* Research Gaps in Gestational Diabetes Mellitus: Executive Summary of a National Institute of Diabetes and Digestive and Kidney Diseases Workshop. *Obs Gynecol* 2018;**132**:496–505. doi:10.1097/AOG.0000000000002726
- 14 Langer O, Conway DL, Berkus MD, *et al.* A comparison of glyburide and insulin in women with gestational diabetes mellitus. *N Engl J Med* 2000;**343**:1134–8. doi:10.1056/NEJM200010193431601
- 15 Rowan JA, Hague WM, Gao W, *et al.* Metformin versus insulin for the treatment of gestational diabetes. *N Engl J Med* 2008;**358**:2003–15. doi:10.1056/NEJMoa0707193
- 16 Balsells M, Garcia-Patterson A, Sola I, *et al.* Glibenclamide, metformin, and insulin for the treatment of gestational diabetes: a systematic review and meta-analysis. *BMJ* 2015;**350**:h102. doi:10.1136/bmj.h102
- 17 Camelo Castillo W, Boggess K, Stürmer T, *et al.* Trends in glyburide compared with insulin

- 1  
2  
3 use for gestational diabetes treatment in the United States, 2000-2011. *Obs Gynecol*  
4 2014;**123**:1177–84. doi:10.1097/AOG.0000000000000285
- 5  
6 18 Maymone AC, Baillargeon J-PP, Menard J, *et al.* Oral hypoglycemic agents for gestational  
7 diabetes mellitus? *Expert Opin Drug Saf* 2011;**10**:227–38.  
8 doi:10.1517/14740338.2011.521740
- 9  
10 19 Hod M, Kapur A, Sacks DA, *et al.* The International Federation of Gynecology and  
11 Obstetrics (FIGO) Initiative on gestational diabetes mellitus: A pragmatic guide for  
12 diagnosis, management, and care. *Int J Gynaecol Obs* 2015;**131 Suppl 3**:S173-211.  
13 doi:10.1016/S0020-7292(15)30007-2
- 14  
15 20 National Institute for Health and Care Excellence. Diabetes in pregnancy: management  
16 from preconception to the postnatal period. 2015;;2–  
17 65.<https://www.nice.org.uk/guidance/ng3> (accessed 8 Nov 2018).
- 18  
19 21 Society of Maternal-Fetal Medicine Publications Committee. SMFM Statement:  
20 Pharmacological treatment of gestational diabetes. *Am J Obs Gynecol* 2018;**218**:B2–4.  
21 doi:10.1016/j.ajog.2018.01.041
- 22  
23 22 Brown J, Martis R, Hughes B, *et al.* Oral anti-diabetic pharmacological therapies for the  
24 treatment of women with gestational diabetes. *Cochrane Database Syst Rev*  
25 2017;**1**:CD011967. doi:10.1002/14651858.CD011967.pub2
- 26  
27 23 Brown J, Grzeskowiak L, Williamson K, *et al.* Insulin for the treatment of women with  
28 gestational diabetes. *Cochrane database Syst Rev* 2017;**11**:CD012037.  
29 doi:10.1002/14651858.CD012037.pub2
- 30  
31 24 Langer O. Pharmacological treatment of gestational diabetes mellitus: point/counterpoint.  
32 *Am J Obs Gynecol* 2018;**218**:490–9. doi:10.1016/j.ajog.2018.01.024
- 33  
34 25 Figueroa Gray M, Hsu C, Kiel L, *et al.* 'It's a Very Big Burden on Me': Women's Experiences  
35 Using Insulin for Gestational Diabetes. *Matern Child Heal J* 2017;**21**:1678–85.  
36 doi:10.1007/s10995-017-2261-8
- 37  
38 26 Ryu RJ, Hays KE, Hebert MF. Gestational diabetes mellitus management with oral  
39 hypoglycemic agents. *Semin Perinatol* 2014;**38**:508–15. doi:10.1053/j.semperi.2014.08.012
- 40  
41 27 Latif L, Hyer S, Shehata H. Metformin effects on treatment satisfaction and quality of life  
42 in gestational diabetes. *Br J Diabetes Vasc Dis* 2013;**13**:178–82. doi:  
43 10.1177/1474651413493933
- 44  
45 28 Bradley C, Todd C, Gorton T, *et al.* The development of an individualized questionnaire  
46 measure of perceived impact of diabetes on quality of life: the ADDQoL. *Qual Life Res*  
47 1999;**8**:79–91.
- 48  
49 29 Yogev Y, Ben-Haroush A, Chen R, *et al.* Undiagnosed Asymptomatic Hypoglycemia. *Obstet*  
50 *Gynecol* 2004;**104**:88–93. doi:10.1097/01.AOG.0000129239.82126.a1
- 51  
52 30 van Weelden W, Wekker V, de Wit L, *et al.* Long-Term Effects of Oral Antidiabetic Drugs  
53 During Pregnancy on Offspring: A Systematic Review and Meta-analysis of Follow-up  
54 Studies of RCTs. *Diabetes Ther* 2018;**9**:1811–29. doi:10.1007/s13300-018-0479-0
- 55  
56 31 Nachum Z, Zafran N, Salim R, *et al.* Glyburide Versus Metformin and Their Combination  
57 for the Treatment of Gestational Diabetes Mellitus: A Randomized Controlled Study.  
58 *Diabetes Care* 2017;**40**:332–7. doi:10.2337/dc16-2307
- 59  
60 32 Zorgevaluatie Nederland. Nederlandse Vereniging voor Obstetrie en Gynaecologie.  
<http://www.zorgevaluatienederland.nl/associations/1> (accessed 4 Feb 2019).

- 1  
2  
3 33 Netherlands Trial Register (NTR): The SUGAR-DIP trial; oral medication strategy versus  
4 insulin for diabetes in pregnancy. <https://www.trialregister.nl/trial/5953> (accessed 29 Jan  
5 2019).  
6  
7 34 Nederlandse Vereniging Voor Obstetrie en Gynaecologie. DIABETES MELLITUS EN  
8 ZWANGERSCHAP Versie 2.0. 2010.<http://www.nvog->  
9 [documenten.nl/index.php?pagina=/richtlijn/item/pagina.php&richtlijn\\_id=863](http://www.nvog-documenten.nl/index.php?pagina=/richtlijn/item/pagina.php&richtlijn_id=863) (accessed  
10 26 Oct 2016).  
11  
12 35 Nederlandse Internisten Vereeniging (NIV). Diabetes en Zwangerschap. 2007.  
13 36 Cornblath M, Hawdon JM, Williams AF, *et al*. Controversies regarding definition of  
14 neonatal hypoglycemia: suggested operational thresholds. *Pediatrics* 2000;**105**:1141–5.  
15 37 Visser GH a, Eilers PHC, Elferink-Stinkens PM, *et al*. New Dutch reference curves for  
16 birthweight by gestational age. *Early Hum Dev* 2009;**85**:737–44.  
17 doi:10.1016/j.earlhumdev.2009.09.008  
18 38 Bradley C, Lewis KS. Measures of psychological well-being and treatment satisfaction  
19 developed from the responses of people with tablet-treated diabetes. *Diabet Med*  
20 1990;**7**:445–51.  
21  
22 39 Bradley C, Bradley C, Bradley C. *Handbook of Psychology and Diabetes: A Guide to*  
23 *Psychological Measurement in Diabetes Research and Practice*. Chur, Switzerland: :  
24 Harwood Academic Publishers 1994.  
25  
26 40 Barendse SM, Speight J, Bradley C. The Renal Treatment Satisfaction Questionnaire  
27 (RTSQ): a measure of satisfaction with treatment for chronic kidney failure. *Am J Kidney*  
28 *Dis* 2005;**45**:572–9. doi:10.1053/j.ajkd.2004.11.010  
29  
30 41 International Conference on Harmonisation of Technical Requirements for Registration of  
31 Pharmaceuticals for Human Use. ICH Harmonised Tripartite Guideline: Clinical Safety Data  
32 Management: Definitions and Standards for Expedited Reporting E2A. 1994.  
33  
34 42 Lamain-de Ruyter M, Kwee A, Naaktgeboren CA, *et al*. External validation of prognostic  
35 models to predict risk of gestational diabetes mellitus in one Dutch cohort: prospective  
36 multicentre cohort study. *BMJ* 2016;**354**:i4338. doi:10.1136/bmj.i4338  
37  
38 43 Zorginstituut Nederland. Richtlijn Voor Het Uitvoeren van Economische Evaluaties in de  
39 Gezondheidszorg. Diemen: 2015.  
40  
41 44 Herdman M, Gudex C, Lloyd A, *et al*. Development and preliminary testing of the new  
42 five-level version of EQ-5D (EQ-5D-5L). *Qual Life Res* 2011;**20**:1727–36.  
43 doi:10.1007/s11136-011-9903-x  
44  
45 45 Bouwmans C, Hakkaart- van Roijen L, Koopmanschap M, Krol M, Severens H BW. *Manual*  
46 *iMTA Productivity Cost Questionnaire (iPCQ)*. Rotterdam: : Institute for Medical  
47 Technology Assessment Erasmus Universiteit Rotterdam 2013.  
48  
49 46 Bouwmans C, Hakkaart- van Roijen L, Koopmanschap M, Krol M, Severens H, Brouwer W.  
50 *Manual iMTA Medical Consumption Questionnaire (iMCQ)*. Rotterdam: : Institute for  
51 Medical Technology Assessment Erasmus Universiteit Rotterdam 2013.  
52  
53 47 Fenwick E, O'Brien BJ, Briggs A. Cost-effectiveness acceptability curves--facts, fallacies and  
54 frequently asked questions. *Health Econ* 2004;**13**:405–15. doi:10.1002/hec.903  
55  
56 48 Zorgevaluatie Nederland. Zorgevaluatie Nederland Study website: SUGAR-DIP trial.  
57 <http://www.zorgevaluatienederland.nl/projects/29/downloads-and-links> (accessed 4 Feb  
58 2019).  
59  
60

1  
2  
3 **FIGURE HEADINGS:**  
4  
5

6  
7 **FIGURE 1:**  
8  
9

10 Figure I: flowchart of comparator (oral glucose lowering drugs) versus control (insulin)  
11  
12  
13  
14  
15  
16  
17  
18  
19  
20  
21  
22  
23  
24  
25  
26  
27  
28  
29  
30  
31  
32  
33  
34  
35  
36  
37  
38  
39  
40  
41  
42  
43  
44  
45  
46  
47  
48  
49  
50  
51  
52  
53  
54  
55  
56  
57  
58  
59  
60

For peer review only

Assessment for eligibility

| Inclusion                                                                                                                                                                                                                                                                                                                                                         | Exclusion                                                                                                                                                                                                                                                                                              |
|-------------------------------------------------------------------------------------------------------------------------------------------------------------------------------------------------------------------------------------------------------------------------------------------------------------------------------------------------------------------|--------------------------------------------------------------------------------------------------------------------------------------------------------------------------------------------------------------------------------------------------------------------------------------------------------|
| <ul style="list-style-type: none"><li>- Maternal age &gt;18 years</li><li>- Singleton pregnancy</li><li>- Diagnosis of GDM as per national guidelines</li><li>- Indication for pharmacological treatment</li><li>- Gestational age 16 - 34 weeks</li><li>- Ability to understand Dutch or English</li><li>- Ability to provide written informed consent</li></ul> | <ul style="list-style-type: none"><li>- Pre-existing type 1 or 2 diabetes mellitus</li><li>- Severe medical or psychiatric comorbidities</li><li>- Significant liver disease or renal insufficiency</li><li>- Fetus affected by major congenital birth defect and/or chromosomal abnormality</li></ul> |

Randomisation

Oral medication  
n = 405

Insulin  
n = 405

metformin 2000mg\*

insulin

in case of insufficient  
glycemic control

metformin 2000mg\*  
+  
glibenclamide 2.5mg  
(up to 15mg/day)

in case of insufficient  
glycemic control

metformin 2000mg\*  
+  
insulin

\* or maximum tolerated dose

Primary outcome: large-for-gestational-age infants

## Supplemental file 1: SUGAR-DIP additional study parameters and endpoints

### Maternal baseline characteristics

- BMI at study entrance
- Age (y)
- Parity
- Mean arterial blood pressure at study entry (mmHg)
- Intoxications (smoking, alcohol use)
- Ethnicity: Caucasian, Indian/Pakistani/Bangladesi, Afro-Caribbean (Antilles, Surinam-creole), Hindu/Caribbean (Surinam Hindu), African (Sub-Sahara), Middle Eastern/North African (Turkish, Moroccan), Asian, Other
- PCOS; polycystic ovarian syndrome
- Thyroid problems: hypo- or hyperthyroidism
- History of gestational diabetes mellitus
- History of psychological problems
- Family history: diabetes mellitus, gestational diabetes, hypertension, preeclampsia, congenital defects
- Conception: spontaneous, fertility treatment (clomifene citrate, gonadotropins, IVF, ICSI)
- Reason for GDM screening
- Blood glucose measures of OGTT (fasting, post load)
- Gestational age at time of OGTT

### Neonatal characteristics

- Gestational age at delivery
- Birth weight (g)
- Weight at discharge (g)
- Sex
- Apgar score 5 – 10 minutes
- Umbilical artery pH levels
- Respiratory support > 24 hours
- Culture proven sepsis
- Neonatal blood glucose levels 1-3-6-12 (24) hours after delivery
- Intravenous glucose therapy
- Convulsions
- Intrauterine fetal death
- Neonatal death
- Congenital defect/anomaly

### Obstetric / delivery characteristics

- Ultrasound examinations: fetal biometry (abdominal circumference, femur length, head circumference, estimated fetal weight) amniotic fluid, fetal heart and brain (where available)
- Induction of labour
- Birth injury: shoulder dystocia (a delivery that requires additional obstetric maneuvers following failure of gentle downward traction on the fetal head to effect delivery of the shoulders), clavicle/humerus fracture or Erb's palsy
- Vacuum assisted delivery
- Blood loss (ml)
- Post-partum haemorrhage >1L
- Blood transfusion
- Sphincter rupture

### Diabetes related endpoints

- Ketoacidosis
- Fasting and postprandial blood glucose levels (study diary)
- Maternal HbA1c (study inclusion, 30 weeks and 36 weeks of gestation)
- Maternal weight gain >12kg
- Final daily dose of insulin (study diary)
- Final daily dose of metformin/glibenclamide (study diary)
- Time to reach glycemic control (study diary)
- Treatment failure: percentage of patients requiring insulin after metformin and glibenclamide
- Side effects: metformin, glibenclamide, insulin

### Biomarkers and laboratory measurements

- Cord-blood: C-peptide, glucose, insulin, triglycerides (where available)
- Cord-blood: metformin / glibenclamide levels (where available)
- Placenta: pathological examination (where available)

### Biobanking (where available)

- Maternal serum
- Placental biopsies
- Umbilical cord blood
- Umbilical cord tissue

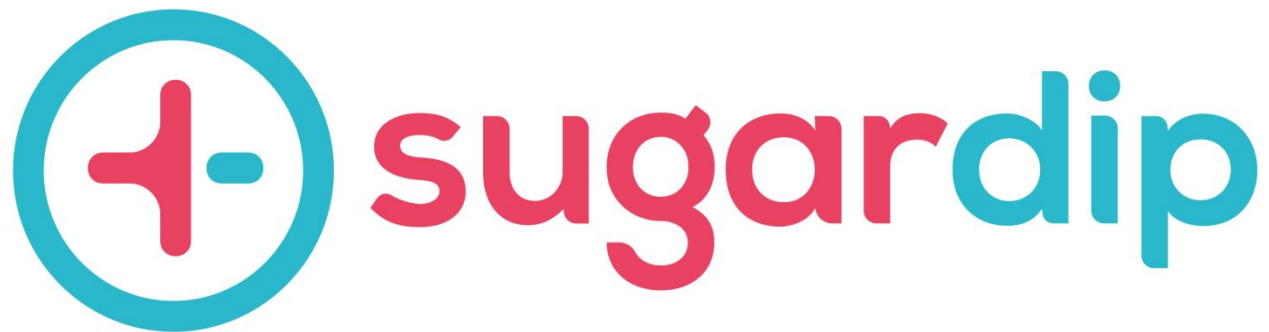

# SUGAR-DIP trial

Oral medication strategy versus insulin for diabetes in pregnancy

Electronic case report form

CRF data entry and randomization:

[www.castoredc.com](http://www.castoredc.com)



- Single possible answer  
 Multiple answers possible

| <b>General information</b>                                                                                                      |                                                                                                                                                                                                                                                                                                                                      |
|---------------------------------------------------------------------------------------------------------------------------------|--------------------------------------------------------------------------------------------------------------------------------------------------------------------------------------------------------------------------------------------------------------------------------------------------------------------------------------|
| Maternal age at time of randomization                                                                                           | (years)                                                                                                                                                                                                                                                                                                                              |
| Estimated date of delivery                                                                                                      | (dd-mm-yyyy)                                                                                                                                                                                                                                                                                                                         |
| <b>In-exclusion</b>                                                                                                             |                                                                                                                                                                                                                                                                                                                                      |
| Age 18 years or older                                                                                                           | <input type="radio"/> Yes<br><input type="radio"/> No                                                                                                                                                                                                                                                                                |
| Singleton pregnancy                                                                                                             | <input type="radio"/> Yes<br><input type="radio"/> No                                                                                                                                                                                                                                                                                |
| Diagnosis if gestational diabetes mellitus as per national guidelines                                                           | <input type="radio"/> Yes<br><input type="radio"/> No                                                                                                                                                                                                                                                                                |
| Indication for pharmacological treatment of GDM                                                                                 | <input type="radio"/> Yes<br><input type="radio"/> No                                                                                                                                                                                                                                                                                |
| Gestational age between 16 and 34 weeks                                                                                         | <input type="radio"/> Yes<br><input type="radio"/> No                                                                                                                                                                                                                                                                                |
| Ability to understand Dutch or English                                                                                          | <input type="radio"/> Yes<br><input type="radio"/> No                                                                                                                                                                                                                                                                                |
| Known pre-existent type I or II diabetes mellitus                                                                               | <input type="radio"/> Yes<br><input type="radio"/> No                                                                                                                                                                                                                                                                                |
| Severe medical or psychological comorbidity                                                                                     | <input type="radio"/> Yes<br><input type="radio"/> No                                                                                                                                                                                                                                                                                |
| Liver disease or kidney failure, or any other condition with contraindications for the use of either metformin or glibenclamide | <input type="radio"/> Yes<br><input type="radio"/> No                                                                                                                                                                                                                                                                                |
| Fetus with major congenital birth defect and/or chromosomal abnormality                                                         | <input type="radio"/> Yes<br><input type="radio"/> No                                                                                                                                                                                                                                                                                |
| <b>Informed consent &amp; Randomization</b>                                                                                     |                                                                                                                                                                                                                                                                                                                                      |
| Patient has provided written informed consent                                                                                   | <input type="radio"/> Yes<br><input type="radio"/> No                                                                                                                                                                                                                                                                                |
| Date of informed consent                                                                                                        | (dd-mm-yyyy)                                                                                                                                                                                                                                                                                                                         |
| Date of randomization                                                                                                           | (dd-mm-yyyy)                                                                                                                                                                                                                                                                                                                         |
| Gestational age at time of randomization                                                                                        | ..... weeks + ..... days                                                                                                                                                                                                                                                                                                             |
| <b>Medical history</b>                                                                                                          |                                                                                                                                                                                                                                                                                                                                      |
| Ethnicity                                                                                                                       | <input type="radio"/> Caucasian/white<br><input type="radio"/> Indian/Pakistani/Bangladesi/Hindu<br><input type="radio"/> Black/African (Sub-Sahara)<br><input type="radio"/> Middle Eastern + North African (Turkey, Morocco, Egypt)<br><input type="radio"/> Asian<br><input type="radio"/> Other<br><input type="radio"/> Unknown |
| Diagnosis of Polycystic Ovary Syndrome (PCOS)                                                                                   | <input type="radio"/> Yes<br><input type="radio"/> No                                                                                                                                                                                                                                                                                |
| Thyroid problems: hypo- or hyperthyroidism                                                                                      | <input type="radio"/> Hypothyroidism<br><input type="radio"/> Hyperthyroidism                                                                                                                                                                                                                                                        |

|                                                                                                  |                                                                                                                                                                                                                                                                                                                                                                                                               |
|--------------------------------------------------------------------------------------------------|---------------------------------------------------------------------------------------------------------------------------------------------------------------------------------------------------------------------------------------------------------------------------------------------------------------------------------------------------------------------------------------------------------------|
|                                                                                                  | <input type="radio"/> Thyroid problem, but type is unknown<br><input type="radio"/> No<br><input type="radio"/> Unknown                                                                                                                                                                                                                                                                                       |
| History of psychological problems                                                                | <input type="checkbox"/> Depression<br><input type="checkbox"/> Anxiety disorder<br><input type="checkbox"/> Burn-out<br><input type="checkbox"/> Other<br><input type="checkbox"/> None<br><input type="checkbox"/> Unknown                                                                                                                                                                                  |
| Maternal chronic or pre-existent hypertension                                                    | <input type="radio"/> Yes (requiring medication)<br><input type="radio"/> Yes (not requiring medication)<br><input type="radio"/> No<br><input type="radio"/> Unknown                                                                                                                                                                                                                                         |
| Maternal medication use (other than folic acid and vitamins) during pregnancy                    | <input type="checkbox"/> No<br><input type="checkbox"/> Aspirin (Acetylsalicylic acid)<br><input type="checkbox"/> Levothyroxine / Thyrox<br><input type="checkbox"/> SSRI (including sertraline, (es)citalopram, paroxetine, fluoxetine)<br><input type="checkbox"/> Tricyclic antidepressant (including amitriptyline, nortriptyline)<br><input type="checkbox"/> Other<br><input type="checkbox"/> Unknown |
| <b>Family history</b>                                                                            |                                                                                                                                                                                                                                                                                                                                                                                                               |
| Family history of type I / type II diabetes mellitus (1 <sup>st</sup> or 2 <sup>nd</sup> degree) | <input type="radio"/> Yes<br><input type="radio"/> No<br><input type="radio"/> Unknown                                                                                                                                                                                                                                                                                                                        |
| Family history of gestational diabetes mellitus (1 <sup>st</sup> or 2 <sup>nd</sup> degree)      | <input type="radio"/> Yes<br><input type="radio"/> No<br><input type="radio"/> Unknown                                                                                                                                                                                                                                                                                                                        |
| Family history if hypertension (1 <sup>st</sup> or 2 <sup>nd</sup> degree)                       | <input type="radio"/> Yes<br><input type="radio"/> No<br><input type="radio"/> Unknown                                                                                                                                                                                                                                                                                                                        |
| Family history of preeclampsia (1 <sup>st</sup> or 2 <sup>nd</sup> degree)                       | <input type="radio"/> Yes<br><input type="radio"/> No<br><input type="radio"/> Unknown                                                                                                                                                                                                                                                                                                                        |
| Family history of congenital defects (1 <sup>st</sup> or 2 <sup>nd</sup> degree)                 | <input type="radio"/> Yes<br><input type="radio"/> No<br><input type="radio"/> Unknown                                                                                                                                                                                                                                                                                                                        |
| <b>Obstetric history</b>                                                                         |                                                                                                                                                                                                                                                                                                                                                                                                               |
| Gravidity                                                                                        | (n)                                                                                                                                                                                                                                                                                                                                                                                                           |
| Parity                                                                                           | (n)                                                                                                                                                                                                                                                                                                                                                                                                           |
| Living children                                                                                  | (n)                                                                                                                                                                                                                                                                                                                                                                                                           |
| Miscarriage – spontaneous abortion                                                               | (n)                                                                                                                                                                                                                                                                                                                                                                                                           |
| Abortus provocatus – induced abortion                                                            | (n)                                                                                                                                                                                                                                                                                                                                                                                                           |
| Extra-uterine gravidity                                                                          | (n)                                                                                                                                                                                                                                                                                                                                                                                                           |
| Intra-uterine death > 16 weeks                                                                   | (n)                                                                                                                                                                                                                                                                                                                                                                                                           |
| Any previous pregnancy with gestational diabetes mellitus?                                       | <input type="radio"/> No (no GDM in previous pregnancies)<br><input type="radio"/> Yes<br><input type="radio"/> Unknown                                                                                                                                                                                                                                                                                       |

|                                                                                                  |                                                                                                                                                                                                                                                                    |
|--------------------------------------------------------------------------------------------------|--------------------------------------------------------------------------------------------------------------------------------------------------------------------------------------------------------------------------------------------------------------------|
| How many pregnancies with gestational diabetes mellitus?                                         | (n)                                                                                                                                                                                                                                                                |
| Any pregnancy with GDM treated with insulin?                                                     | <input type="radio"/> No<br><input type="radio"/> Yes<br><input type="radio"/> Unknown                                                                                                                                                                             |
| Any previous pregnancy with pregnancy induced hypertension (PIH)?                                | <input type="radio"/> No (no PIH in previous pregnancies)<br><input type="radio"/> Yes<br><input type="radio"/> Unknown                                                                                                                                            |
| Any previous pregnancy with preeclampsia (PE)?                                                   | <input type="radio"/> No (no PE in previous pregnancies)<br><input type="radio"/> Yes<br><input type="radio"/> Unknown                                                                                                                                             |
| Any previous pregnancy with Hemolysis Elevated Liver enzymes and Low Platelets syndrome (HELLP)? | <input type="radio"/> No (no HELLP in previous pregnancies)<br><input type="radio"/> Yes<br><input type="radio"/> Unknown                                                                                                                                          |
| Any previous pregnancy with a preterm delivery (< 37 weeks of gestation)                         | <input type="radio"/> No (no preterm delivery in previous pregnancies)<br><input type="radio"/> Yes<br><input type="radio"/> Unknown                                                                                                                               |
| A caesarean section (primary or secondary) in the past?                                          | <input type="radio"/> No (no caesarean section in the past)<br><input type="radio"/> Yes<br><input type="radio"/> Unknown                                                                                                                                          |
| Any hemorrhagia postpartum (HPP, blood loss $\geq$ 1000ml) in the past?                          | <input type="radio"/> No (no HPP in the past)<br><input type="radio"/> Yes<br><input type="radio"/> Unknown                                                                                                                                                        |
| Please complete the following questions for all previous pregnancies > 16 weeks                  | Parity number: .....<br>Gestational age: ..... weeks + ..... days<br>Gender: male, female, unknown<br>Birth weight (grams): .....                                                                                                                                  |
| <b>Current pregnancy</b>                                                                         |                                                                                                                                                                                                                                                                    |
| Mode of conception                                                                               | <input type="radio"/> Spontaneous<br><input type="radio"/> Clomifene ovulation induction<br><input type="radio"/> Intra-uterine insemination (IUI)<br><input type="radio"/> IVF / ICSI<br><input type="radio"/> Egg cell donation<br><input type="radio"/> Unknown |
| Maternal height                                                                                  | (cm)                                                                                                                                                                                                                                                               |
| Maternal weight at start of pregnancy                                                            | (kg)                                                                                                                                                                                                                                                               |
| Maternal weight at time of study inclusion                                                       | (kg)                                                                                                                                                                                                                                                               |
| Maternal weight at time of delivery / last pre-delivery visit                                    | (kg)                                                                                                                                                                                                                                                               |
| Maternal weight gain (total) >12kg                                                               | <input type="radio"/> Yes<br><input type="radio"/> No<br><input type="radio"/> Unknown                                                                                                                                                                             |
| Maternal blood pressure systolic at first antenatal visit                                        | (mmHg)                                                                                                                                                                                                                                                             |
| Maternal blood pressure diastolic at first antenatal visit                                       | (mmHg)                                                                                                                                                                                                                                                             |
| Smoking during pregnancy                                                                         | <input type="radio"/> No                                                                                                                                                                                                                                           |

|                                                                                 |                                                                                                                                                                                                                                                                                                                                                                                                                                 |
|---------------------------------------------------------------------------------|---------------------------------------------------------------------------------------------------------------------------------------------------------------------------------------------------------------------------------------------------------------------------------------------------------------------------------------------------------------------------------------------------------------------------------|
|                                                                                 | <ul style="list-style-type: none"> <li><input type="radio"/> Quit in first trimester</li> <li><input type="radio"/> Quit later in pregnancy</li> <li><input type="radio"/> Yes (still smoking)</li> <li><input type="radio"/> Unknown</li> </ul>                                                                                                                                                                                |
| Alcohol use during pregnancy                                                    | <ul style="list-style-type: none"> <li><input type="radio"/> Yes</li> <li><input type="radio"/> No</li> <li><input type="radio"/> Unknown</li> </ul>                                                                                                                                                                                                                                                                            |
| Glucose value (random) in first trimester                                       | (mmol/L)                                                                                                                                                                                                                                                                                                                                                                                                                        |
| Diagnostic test used to determine gestational diabetes                          | <ul style="list-style-type: none"> <li><input type="radio"/> Oral glucose tolerance test (75 gram)</li> <li><input type="radio"/> Oral glucose tolerance test (100 gram)</li> <li><input type="radio"/> Fasting glucose level</li> <li><input type="radio"/> Glucose day curve</li> <li><input type="radio"/> Other</li> </ul>                                                                                                  |
| Date of GDM diagnosis                                                           | (dd-mm-yyyy)                                                                                                                                                                                                                                                                                                                                                                                                                    |
| Glucose value of 75 gram OGTT fasting (laboratory)                              | (mmol/L)                                                                                                                                                                                                                                                                                                                                                                                                                        |
| Glucose value of 75 gram OGTT 2 hours (laboratory)                              | (mmol/L)                                                                                                                                                                                                                                                                                                                                                                                                                        |
| Glucose value of 100 gram OGTT fasting (laboratory)                             | (mmol/L)                                                                                                                                                                                                                                                                                                                                                                                                                        |
| Glucose value of 100 gram OGTT 2 hours (laboratory)                             | (mmol/L)                                                                                                                                                                                                                                                                                                                                                                                                                        |
| Glucose value of 100 gram OGTT 3 hours (laboratory)                             | (mmol/L)                                                                                                                                                                                                                                                                                                                                                                                                                        |
| Glucose value fasting (laboratory)                                              | (mmol/L)                                                                                                                                                                                                                                                                                                                                                                                                                        |
| Highest glucose value of glucose day curve                                      | (mmol/L)                                                                                                                                                                                                                                                                                                                                                                                                                        |
| Main reason to perform OGTT                                                     | <ul style="list-style-type: none"> <li><input type="radio"/> Suspected macrosomia/estimated fetal weight &gt;p90 (current pregnancy)</li> <li><input type="radio"/> Family history with diabetes</li> <li><input type="radio"/> Obesity</li> <li><input type="radio"/> Prior pregnancy with GDM</li> <li><input type="radio"/> Ethnicity</li> <li><input type="radio"/> Other</li> <li><input type="radio"/> Unknown</li> </ul> |
| <b>Pregnancy complications</b>                                                  |                                                                                                                                                                                                                                                                                                                                                                                                                                 |
| Pregnancy induced hypertension (systolic BP > 140mmHg or diastolic BP > 90mmHg) | <ul style="list-style-type: none"> <li><input type="radio"/> Yes</li> <li><input type="radio"/> No</li> <li><input type="radio"/> Unknown</li> </ul>                                                                                                                                                                                                                                                                            |
| Pregnancy induced hypertension                                                  | <ul style="list-style-type: none"> <li><input type="radio"/> Without medication</li> <li><input type="radio"/> With medication (for instance labetalol or methyldopa)</li> <li><input type="radio"/> Unknown whether medication was used</li> <li><input type="radio"/> Other</li> </ul>                                                                                                                                        |
| Preeclampsia (hypertension with albuminuria)                                    | <ul style="list-style-type: none"> <li><input type="radio"/> Yes</li> <li><input type="radio"/> No</li> <li><input type="radio"/> Unknown</li> </ul>                                                                                                                                                                                                                                                                            |
| HELLP                                                                           | <ul style="list-style-type: none"> <li><input type="radio"/> Yes</li> <li><input type="radio"/> No</li> </ul>                                                                                                                                                                                                                                                                                                                   |

|                                                                                           |                                                                                                                                                                                                                                                                                                                                                                                                                                                                                                                                           |
|-------------------------------------------------------------------------------------------|-------------------------------------------------------------------------------------------------------------------------------------------------------------------------------------------------------------------------------------------------------------------------------------------------------------------------------------------------------------------------------------------------------------------------------------------------------------------------------------------------------------------------------------------|
|                                                                                           | <input type="radio"/> Unknown                                                                                                                                                                                                                                                                                                                                                                                                                                                                                                             |
| Trombo-embolic complications (deep venous thrombosis or lung-embolus)                     | <input type="radio"/> Yes<br><input type="radio"/> No<br><input type="radio"/> Unknown                                                                                                                                                                                                                                                                                                                                                                                                                                                    |
| Hospital admission because of severe glycaemic dysregulation                              | <input type="radio"/> Yes<br><input type="radio"/> No<br><input type="radio"/> Unknown                                                                                                                                                                                                                                                                                                                                                                                                                                                    |
| Fetal structural defects (ultrasound)                                                     | <input type="radio"/> Yes<br><input type="radio"/> No<br><input type="radio"/> Unknown                                                                                                                                                                                                                                                                                                                                                                                                                                                    |
| Fetal structural defects (ultrasound)                                                     | <input type="checkbox"/> Central nervous system, including spina bifida and anencephaly<br><input type="checkbox"/> Skeletal system, including caudal regression syndrome, limb defects and sacral agenesis<br><input type="checkbox"/> Cardiovascular, including transposition of the great vessels, septal defects, single umbilical artery (SUA), coarctation of the aorta<br><input type="checkbox"/> Gastrointestinal, including duodenal atresia<br><input type="checkbox"/> Unknown which system<br><input type="checkbox"/> Other |
| Macrosomia (EFW >p90 or FAC >p90 or mentioned in conclusion)                              | <input type="radio"/> Yes<br><input type="radio"/> No<br><input type="radio"/> Unknown                                                                                                                                                                                                                                                                                                                                                                                                                                                    |
| Intra-uterine growth restriction (IUGR) (EFW <p10 or FAC <p10 or mentioned in conclusion) | <input type="radio"/> Yes<br><input type="radio"/> No<br><input type="radio"/> Unknown                                                                                                                                                                                                                                                                                                                                                                                                                                                    |
| Polyhydramnios (ultrasound)                                                               | <input type="radio"/> Yes<br><input type="radio"/> No<br><input type="radio"/> Unknown                                                                                                                                                                                                                                                                                                                                                                                                                                                    |
| Oligohydramnios (ultrasound)                                                              | <input type="radio"/> Yes<br><input type="radio"/> No<br><input type="radio"/> Unknown                                                                                                                                                                                                                                                                                                                                                                                                                                                    |
| Corticosteroid used? (for instance because of imminent premature birth)                   | <input type="radio"/> Yes<br><input type="radio"/> No<br><input type="radio"/> Unknown                                                                                                                                                                                                                                                                                                                                                                                                                                                    |
| Intra-uterine death                                                                       | <input type="radio"/> Yes<br><input type="radio"/> No                                                                                                                                                                                                                                                                                                                                                                                                                                                                                     |
| Date of intra-uterine death                                                               | (dd-mm-yyyy)                                                                                                                                                                                                                                                                                                                                                                                                                                                                                                                              |
| <b>Delivery</b>                                                                           |                                                                                                                                                                                                                                                                                                                                                                                                                                                                                                                                           |
| Date of last dose of antidiabetic medication                                              | (dd-mm-yyyy)                                                                                                                                                                                                                                                                                                                                                                                                                                                                                                                              |
| Time of last dose of antidiabetic medication                                              | (hh-mm)                                                                                                                                                                                                                                                                                                                                                                                                                                                                                                                                   |
| Onset of labour                                                                           | <input type="radio"/> Spontaneously<br><input type="radio"/> Primary caesarean section<br><input type="radio"/> Induction                                                                                                                                                                                                                                                                                                                                                                                                                 |
| Was induction planned for a different reason than gestational diabetes mellitus?          | <input type="radio"/> Yes<br><input type="radio"/> No                                                                                                                                                                                                                                                                                                                                                                                                                                                                                     |

|                                          |                                                                                                                                                                                                                                                                                                                                                                                                                                                                                                                                                                                                                                                                                                                                                                                 |
|------------------------------------------|---------------------------------------------------------------------------------------------------------------------------------------------------------------------------------------------------------------------------------------------------------------------------------------------------------------------------------------------------------------------------------------------------------------------------------------------------------------------------------------------------------------------------------------------------------------------------------------------------------------------------------------------------------------------------------------------------------------------------------------------------------------------------------|
|                                          | <input type="radio"/> Unknown                                                                                                                                                                                                                                                                                                                                                                                                                                                                                                                                                                                                                                                                                                                                                   |
| Reason for induction                     | <input type="checkbox"/> Elective<br><input type="checkbox"/> Ruptured membranes<br><input type="checkbox"/> Hypertension<br><input type="checkbox"/> Preeclampsia<br><input type="checkbox"/> HELLP syndrome<br><input type="checkbox"/> Maternal: blood glucose dysregulation<br><input type="checkbox"/> Maternal: other → specify<br><input type="checkbox"/> Fetal: suspected macrosomia<br><input type="checkbox"/> Fetal: suspected intra-uterine growth restriction<br><input type="checkbox"/> Fetal: no movements<br><input type="checkbox"/> Fetal: heart rate anomaly<br><input type="checkbox"/> Fetal: oligohydramnios<br><input type="checkbox"/> Fetal: meconium<br><input type="checkbox"/> Fetal: other → specify<br><input type="checkbox"/> Other → specify |
| Method of induction                      | <input type="checkbox"/> Foley catheter / mechanical<br><input type="checkbox"/> Prostaglandins<br><input type="checkbox"/> Amniotomy<br><input type="checkbox"/> Oxytocin<br><input type="checkbox"/> Other<br><input type="checkbox"/> Unknown                                                                                                                                                                                                                                                                                                                                                                                                                                                                                                                                |
| Indication for primary caesarean section | <input type="checkbox"/> Elective: breech<br><input type="checkbox"/> Elective: obstetric history (previous caesarean section)<br><input type="checkbox"/> Elective: obstetric history (total sphincter rupture)<br><input type="checkbox"/> Elective: obstetric history (other)<br><input type="checkbox"/> Fetal distress<br><input type="checkbox"/> Fetal: intra-uterine growth restriction<br><input type="checkbox"/> Fetal: other<br><input type="checkbox"/> Maternal: hypertension<br><input type="checkbox"/> Maternal: preeclampsia<br><input type="checkbox"/> Maternal: HELLP syndrome<br><input type="checkbox"/> Maternal: other<br><input type="checkbox"/> Unknown                                                                                             |
| Pain relief during delivery              | <input type="checkbox"/> None<br><input type="checkbox"/> Opioid subcutaneous (pethidine)<br><input type="checkbox"/> Opioid intravenous (remifentanyl)<br><input type="checkbox"/> Nitrous oxide<br><input type="checkbox"/> Epidural<br><input type="checkbox"/> Other<br><input type="checkbox"/> Unknown                                                                                                                                                                                                                                                                                                                                                                                                                                                                    |
| Medication during labour                 | <input type="checkbox"/> Oxytocin<br><input type="checkbox"/> Antibiotics<br><input type="checkbox"/> Tocolytics<br><input type="checkbox"/> Glucose/insulin intravenous<br><input type="checkbox"/> Antihypertensive agents intravenous<br><input type="checkbox"/> Other → specify                                                                                                                                                                                                                                                                                                                                                                                                                                                                                            |

7

|                                                   |                                                                                                                                                                                                                                                                                                                                                                                                                                                                         |
|---------------------------------------------------|-------------------------------------------------------------------------------------------------------------------------------------------------------------------------------------------------------------------------------------------------------------------------------------------------------------------------------------------------------------------------------------------------------------------------------------------------------------------------|
|                                                   | <input type="checkbox"/> None<br><input type="checkbox"/> Unknown                                                                                                                                                                                                                                                                                                                                                                                                       |
| Fever during delivery                             | <input type="radio"/> No<br><input type="radio"/> Yes (>38°C <38.5°C)<br><input type="radio"/> Yes (≥38.5°C)<br><input type="radio"/> Unknown                                                                                                                                                                                                                                                                                                                           |
| Fetal presentation                                | <input type="radio"/> Cephalic<br><input type="radio"/> Breech<br><input type="radio"/> Other                                                                                                                                                                                                                                                                                                                                                                           |
| Route of delivery                                 | <input type="radio"/> Vaginal, spontaneously<br><input type="radio"/> Instrumental (vacuum extraction)<br><input type="radio"/> Instrumental (forcipal extraction)<br><input type="radio"/> Secondary caesarean section                                                                                                                                                                                                                                                 |
| Indication for vacuum / forcipal extraction       | <input type="radio"/> Fetal distress<br><input type="radio"/> Failure to progress<br><input type="radio"/> Maternal indication<br><input type="radio"/> Other fetal indication<br><input type="radio"/> Unknown                                                                                                                                                                                                                                                         |
| Indication for secondary caesarean section        | <input type="radio"/> Fetal distress<br><input type="radio"/> Failure to progress<br><input type="radio"/> Failed induction<br><input type="radio"/> Maternal indication<br><input type="radio"/> Failed vacuum / forcipal extraction<br><input type="radio"/> Other fetal indication<br><input type="radio"/> Unknown                                                                                                                                                  |
| Were maneuvers used because of shoulder dystocia? | <input type="checkbox"/> No (no shoulder dystocia)<br><input type="checkbox"/> Traction to the fetal head<br><input type="checkbox"/> McRoberts<br><input type="checkbox"/> Rubin<br><input type="checkbox"/> All-fours<br><input type="checkbox"/> Manual delivery of posterior arm<br><input type="checkbox"/> Intentional breaking of clavicle<br><input type="checkbox"/> Shoulder dystocia but unknown which maneuvers were used<br><input type="checkbox"/> Other |
| Amniotic fluid                                    | <input type="radio"/> Clear<br><input type="radio"/> Meconium stained<br><input type="radio"/> Unknown                                                                                                                                                                                                                                                                                                                                                                  |
| Delivery of the placenta                          | <input type="radio"/> Spontaneously / controlled cord traction<br><input type="radio"/> Manual removal in operating room<br><input type="radio"/> Removed during caesarean section<br><input type="radio"/> Unknown                                                                                                                                                                                                                                                     |
| Total blood loss                                  | (ml)                                                                                                                                                                                                                                                                                                                                                                                                                                                                    |
| Blood transfusion                                 | <input type="radio"/> Yes<br><input type="radio"/> No<br><input type="radio"/> Unknown                                                                                                                                                                                                                                                                                                                                                                                  |
| Perineum                                          | <input type="checkbox"/> No laceration(s)<br><input type="checkbox"/> First / second degree laceration(s)                                                                                                                                                                                                                                                                                                                                                               |

|                                                   |                                                                                                                                                                                   |
|---------------------------------------------------|-----------------------------------------------------------------------------------------------------------------------------------------------------------------------------------|
|                                                   | <input type="checkbox"/> Third degree laceration(s)<br><input type="checkbox"/> Episiotomy<br><input type="checkbox"/> Unknown                                                    |
| <b>Neonatal data</b>                              |                                                                                                                                                                                   |
| Date of birth                                     | (dd-mm-yyyy)                                                                                                                                                                      |
| Gestational age at birth                          | ..... weeks + ..... days                                                                                                                                                          |
| Live birth                                        | <input type="radio"/> Yes<br><input type="radio"/> No                                                                                                                             |
| Neonatal death                                    | <input type="radio"/> No<br><input type="radio"/> Yes (intra-uterine death)<br><input type="radio"/> Yes, <24 hours postpartum<br><input type="radio"/> Yes, >24 hours postpartum |
| Gender                                            | <input type="radio"/> Female<br><input type="radio"/> Male<br><input type="radio"/> Unknown                                                                                       |
| Apgar score 1 minute postpartum                   |                                                                                                                                                                                   |
| Apgar score 5 minutes postpartum                  |                                                                                                                                                                                   |
| Apgar score 10 minutes postpartum                 |                                                                                                                                                                                   |
| Umbilical cord blood pH (arterial)                |                                                                                                                                                                                   |
| Umbilical cord blood base excess (arterial)       |                                                                                                                                                                                   |
| Umbilical cord blood pH (venous)                  |                                                                                                                                                                                   |
| Umbilical cord blood base excess (venous)         |                                                                                                                                                                                   |
| Birth weight                                      | (grams)                                                                                                                                                                           |
| Fracture                                          | <input type="checkbox"/> None<br><input type="checkbox"/> Humerus<br><input type="checkbox"/> Clavicle<br><input type="checkbox"/> Other<br><input type="checkbox"/> Unknown      |
| Erbs palsy                                        | <input type="radio"/> No<br><input type="radio"/> Yes<br><input type="radio"/> Unknown                                                                                            |
| Preterm birth (<37 weeks of gestation)            | <input type="radio"/> No<br><input type="radio"/> Yes (iatrogenic)<br><input type="radio"/> Yes (spontaneous)                                                                     |
| Neonatal congenital malformation: heart           | <input type="radio"/> No<br><input type="radio"/> Yes<br><input type="radio"/> Unknown                                                                                            |
| Neonatal congenital malformation: neural tube     | <input type="radio"/> No<br><input type="radio"/> Yes<br><input type="radio"/> Unknown                                                                                            |
| Neonatal congenital malformation: urogenital      | <input type="radio"/> No<br><input type="radio"/> Yes<br><input type="radio"/> Unknown                                                                                            |
| Neonatal congenital malformation: other           | <input type="radio"/> No<br><input type="radio"/> Yes<br><input type="radio"/> Unknown                                                                                            |
| First neonatal glucose postpartum                 | (mmol/L)                                                                                                                                                                          |
| Date of first neonatal glucose testing postpartum | (dd-mm-yyyy)                                                                                                                                                                      |
| Time of first neonatal glucose testing postpartum | (hh:mm)                                                                                                                                                                           |



|    |                                                                                                       |                                                                                                                                                                                                                                                                                                                                                                                                                                                                                                                                                                                                                                |
|----|-------------------------------------------------------------------------------------------------------|--------------------------------------------------------------------------------------------------------------------------------------------------------------------------------------------------------------------------------------------------------------------------------------------------------------------------------------------------------------------------------------------------------------------------------------------------------------------------------------------------------------------------------------------------------------------------------------------------------------------------------|
| 1  |                                                                                                       |                                                                                                                                                                                                                                                                                                                                                                                                                                                                                                                                                                                                                                |
| 2  |                                                                                                       |                                                                                                                                                                                                                                                                                                                                                                                                                                                                                                                                                                                                                                |
| 3  | Second neonatal glucose value postpartum                                                              | (mmol/L)                                                                                                                                                                                                                                                                                                                                                                                                                                                                                                                                                                                                                       |
| 4  | Date of second neonatal glucose testing postpartum                                                    | (dd-mm-yyyy)                                                                                                                                                                                                                                                                                                                                                                                                                                                                                                                                                                                                                   |
| 5  |                                                                                                       |                                                                                                                                                                                                                                                                                                                                                                                                                                                                                                                                                                                                                                |
| 6  | Time of second neonatal glucose testing postpartum                                                    | (hh:mm)                                                                                                                                                                                                                                                                                                                                                                                                                                                                                                                                                                                                                        |
| 7  |                                                                                                       |                                                                                                                                                                                                                                                                                                                                                                                                                                                                                                                                                                                                                                |
| 8  | Third neonatal glucose value postpartum                                                               | (mmol/L)                                                                                                                                                                                                                                                                                                                                                                                                                                                                                                                                                                                                                       |
| 9  | Date of third neonatal glucose testing postpartum                                                     | (dd-mm-yyyy)                                                                                                                                                                                                                                                                                                                                                                                                                                                                                                                                                                                                                   |
| 10 |                                                                                                       |                                                                                                                                                                                                                                                                                                                                                                                                                                                                                                                                                                                                                                |
| 11 | Time of third neonatal glucose testing postpartum                                                     | (hh:mm)                                                                                                                                                                                                                                                                                                                                                                                                                                                                                                                                                                                                                        |
| 12 |                                                                                                       |                                                                                                                                                                                                                                                                                                                                                                                                                                                                                                                                                                                                                                |
| 13 | Fourth neonatal glucose value postpartum                                                              | (mmol/L)                                                                                                                                                                                                                                                                                                                                                                                                                                                                                                                                                                                                                       |
| 14 | Date of fourth neonatal glucose testing postpartum                                                    | (dd-mm-yyyy)                                                                                                                                                                                                                                                                                                                                                                                                                                                                                                                                                                                                                   |
| 15 |                                                                                                       |                                                                                                                                                                                                                                                                                                                                                                                                                                                                                                                                                                                                                                |
| 16 | Time of fourth neonatal glucose testing postpartum                                                    | (hh:mm)                                                                                                                                                                                                                                                                                                                                                                                                                                                                                                                                                                                                                        |
| 17 |                                                                                                       |                                                                                                                                                                                                                                                                                                                                                                                                                                                                                                                                                                                                                                |
| 18 | Fifth neonatal glucose value postpartum                                                               | (mmol/L)                                                                                                                                                                                                                                                                                                                                                                                                                                                                                                                                                                                                                       |
| 19 | Date of fifth neonatal glucose testing postpartum                                                     | (dd-mm-yyyy)                                                                                                                                                                                                                                                                                                                                                                                                                                                                                                                                                                                                                   |
| 20 |                                                                                                       |                                                                                                                                                                                                                                                                                                                                                                                                                                                                                                                                                                                                                                |
| 21 | Time of fifth neonatal glucose testing postpartum                                                     | (hh:mm)                                                                                                                                                                                                                                                                                                                                                                                                                                                                                                                                                                                                                        |
| 22 |                                                                                                       |                                                                                                                                                                                                                                                                                                                                                                                                                                                                                                                                                                                                                                |
| 23 | Sixth neonatal glucose value postpartum                                                               | (mmol/L)                                                                                                                                                                                                                                                                                                                                                                                                                                                                                                                                                                                                                       |
| 24 | Date of sixth neonatal glucose testing postpartum                                                     | (dd-mm-yyyy)                                                                                                                                                                                                                                                                                                                                                                                                                                                                                                                                                                                                                   |
| 25 |                                                                                                       |                                                                                                                                                                                                                                                                                                                                                                                                                                                                                                                                                                                                                                |
| 26 | Time of sixth neonatal glucose testing postpartum                                                     | (hh:mm)                                                                                                                                                                                                                                                                                                                                                                                                                                                                                                                                                                                                                        |
| 27 |                                                                                                       |                                                                                                                                                                                                                                                                                                                                                                                                                                                                                                                                                                                                                                |
| 28 | Any neonatal glucose value between 2.0-2.6mmol/L ( $\geq 2.0 < 2.7$ ) during in hospital admission?   | <ul style="list-style-type: none"> <li><input type="radio"/> No</li> <li><input type="radio"/> Yes, one value between 2.0 and 2.6</li> <li><input type="radio"/> Yes, more than one value between 2.0 and 2.6</li> <li><input type="radio"/> Unknown</li> </ul>                                                                                                                                                                                                                                                                                                                                                                |
| 29 |                                                                                                       |                                                                                                                                                                                                                                                                                                                                                                                                                                                                                                                                                                                                                                |
| 30 | Any neonatal glucose value $< 2.0$ mmol/L during hospital admission?                                  | <ul style="list-style-type: none"> <li><input type="radio"/> No</li> <li><input type="radio"/> Yes, one value <math>&lt; 2.0</math></li> <li><input type="radio"/> Yes, more than one value <math>&lt; 2.0</math></li> <li><input type="radio"/> Unknown</li> </ul>                                                                                                                                                                                                                                                                                                                                                            |
| 31 |                                                                                                       |                                                                                                                                                                                                                                                                                                                                                                                                                                                                                                                                                                                                                                |
| 32 |                                                                                                       |                                                                                                                                                                                                                                                                                                                                                                                                                                                                                                                                                                                                                                |
| 33 |                                                                                                       |                                                                                                                                                                                                                                                                                                                                                                                                                                                                                                                                                                                                                                |
| 34 |                                                                                                       |                                                                                                                                                                                                                                                                                                                                                                                                                                                                                                                                                                                                                                |
| 35 |                                                                                                       |                                                                                                                                                                                                                                                                                                                                                                                                                                                                                                                                                                                                                                |
| 36 |                                                                                                       |                                                                                                                                                                                                                                                                                                                                                                                                                                                                                                                                                                                                                                |
| 37 |                                                                                                       |                                                                                                                                                                                                                                                                                                                                                                                                                                                                                                                                                                                                                                |
| 38 | <b>Postpartum</b>                                                                                     |                                                                                                                                                                                                                                                                                                                                                                                                                                                                                                                                                                                                                                |
| 39 | Were mother or child admitted directly postpartum? (including postpartum observation of mother/child) | <ul style="list-style-type: none"> <li><input type="radio"/> No (mother and child went home directly after delivery)</li> <li><input type="radio"/> Yes, maternal admission only</li> <li><input type="radio"/> Yes, maternal and neonatal admission</li> <li><input type="radio"/> Yes, neonatal admission only</li> </ul>                                                                                                                                                                                                                                                                                                    |
| 40 |                                                                                                       |                                                                                                                                                                                                                                                                                                                                                                                                                                                                                                                                                                                                                                |
| 41 |                                                                                                       |                                                                                                                                                                                                                                                                                                                                                                                                                                                                                                                                                                                                                                |
| 42 |                                                                                                       |                                                                                                                                                                                                                                                                                                                                                                                                                                                                                                                                                                                                                                |
| 43 |                                                                                                       |                                                                                                                                                                                                                                                                                                                                                                                                                                                                                                                                                                                                                                |
| 44 | Maternal: what was the reason for admission?                                                          | <ul style="list-style-type: none"> <li><input type="checkbox"/> Maternal observation/routine stay (for instance because of more blood loss than usual or post-caesarean)</li> <li><input type="checkbox"/> Neonatal observation (for instance because of blood glucose evaluation)</li> <li><input type="checkbox"/> Fluxus (HPP)</li> <li><input type="checkbox"/> Pregnancy induced hypertension</li> <li><input type="checkbox"/> Preeclampsia</li> <li><input type="checkbox"/> HELLP syndrome</li> <li><input type="checkbox"/> Glycemic dysregulation</li> <li><input type="checkbox"/> Thrombo-embolic event</li> </ul> |
| 45 |                                                                                                       |                                                                                                                                                                                                                                                                                                                                                                                                                                                                                                                                                                                                                                |
| 46 |                                                                                                       |                                                                                                                                                                                                                                                                                                                                                                                                                                                                                                                                                                                                                                |
| 47 |                                                                                                       |                                                                                                                                                                                                                                                                                                                                                                                                                                                                                                                                                                                                                                |
| 48 |                                                                                                       |                                                                                                                                                                                                                                                                                                                                                                                                                                                                                                                                                                                                                                |
| 49 |                                                                                                       |                                                                                                                                                                                                                                                                                                                                                                                                                                                                                                                                                                                                                                |
| 50 |                                                                                                       |                                                                                                                                                                                                                                                                                                                                                                                                                                                                                                                                                                                                                                |
| 51 |                                                                                                       |                                                                                                                                                                                                                                                                                                                                                                                                                                                                                                                                                                                                                                |
| 52 |                                                                                                       |                                                                                                                                                                                                                                                                                                                                                                                                                                                                                                                                                                                                                                |
| 53 |                                                                                                       |                                                                                                                                                                                                                                                                                                                                                                                                                                                                                                                                                                                                                                |
| 54 |                                                                                                       |                                                                                                                                                                                                                                                                                                                                                                                                                                                                                                                                                                                                                                |
| 55 |                                                                                                       |                                                                                                                                                                                                                                                                                                                                                                                                                                                                                                                                                                                                                                |
| 56 |                                                                                                       |                                                                                                                                                                                                                                                                                                                                                                                                                                                                                                                                                                                                                                |

|                                              |                                                                                                                                                                                                                                                                                                                                                                                                                                                                                                                                                                                                                                                                                                                                                                                                                                                                                                                                                                                                                                                               |
|----------------------------------------------|---------------------------------------------------------------------------------------------------------------------------------------------------------------------------------------------------------------------------------------------------------------------------------------------------------------------------------------------------------------------------------------------------------------------------------------------------------------------------------------------------------------------------------------------------------------------------------------------------------------------------------------------------------------------------------------------------------------------------------------------------------------------------------------------------------------------------------------------------------------------------------------------------------------------------------------------------------------------------------------------------------------------------------------------------------------|
|                                              | <input type="checkbox"/> Hemodynamically unstable (Intensive Care)<br><input type="checkbox"/> Infection<br><input type="checkbox"/> Other                                                                                                                                                                                                                                                                                                                                                                                                                                                                                                                                                                                                                                                                                                                                                                                                                                                                                                                    |
| Maternal: type of admission                  | <input type="radio"/> Ward<br><input type="radio"/> Medium Care<br><input type="radio"/> Intensive Care                                                                                                                                                                                                                                                                                                                                                                                                                                                                                                                                                                                                                                                                                                                                                                                                                                                                                                                                                       |
| Maternal: discharge to                       | <input type="radio"/> Home<br><input type="radio"/> Other ward<br><input type="radio"/> Medium Care<br><input type="radio"/> Intensive Care<br><input type="radio"/> Other hospital                                                                                                                                                                                                                                                                                                                                                                                                                                                                                                                                                                                                                                                                                                                                                                                                                                                                           |
| Maternal: date of transfer                   | (dd-mm-yyyy)                                                                                                                                                                                                                                                                                                                                                                                                                                                                                                                                                                                                                                                                                                                                                                                                                                                                                                                                                                                                                                                  |
| Maternal: type of admission after transfer   | <input type="radio"/> Ward<br><input type="radio"/> Medium Care<br><input type="radio"/> Intensive Care                                                                                                                                                                                                                                                                                                                                                                                                                                                                                                                                                                                                                                                                                                                                                                                                                                                                                                                                                       |
| Maternal: date of final discharge to home    | (dd-mm-yyyy)                                                                                                                                                                                                                                                                                                                                                                                                                                                                                                                                                                                                                                                                                                                                                                                                                                                                                                                                                                                                                                                  |
| Neonatal: what was the reason for admission? | <input type="checkbox"/> Routine observation for blood glucoses<br><input type="checkbox"/> Routine observation for meconium<br><input type="checkbox"/> Routine observation for suspected infection<br><input type="checkbox"/> Hypoglycemia without i.v. glucose<br><input type="checkbox"/> Hypoglycemia with iv glucose<br><input type="checkbox"/> Hyperbilirubinemia with phototherapy<br><input type="checkbox"/> Hyperbilirubinemia without phototherapy<br><input type="checkbox"/> Respiratory distress syndrome (RDS) / respiratory support or oxygen >24 hours<br><input type="checkbox"/> Broncho pulmonary dysplasia (BPD)<br><input type="checkbox"/> Intraventricular haemorrhage<br><input type="checkbox"/> Sepsis<br><input type="checkbox"/> Necrotizing enterocolitis<br><input type="checkbox"/> Convulsions<br><input type="checkbox"/> Partial exchange transfusion<br><input type="checkbox"/> Trombocyte transfusion<br><input type="checkbox"/> Prematurity<br><input type="checkbox"/> Asphyxia<br><input type="checkbox"/> Other |
| Neonatal: type of admission                  | <input type="radio"/> Ward<br><input type="radio"/> Medium Care<br><input type="radio"/> Intensive Care                                                                                                                                                                                                                                                                                                                                                                                                                                                                                                                                                                                                                                                                                                                                                                                                                                                                                                                                                       |
| Neonatal: discharge to                       | <input type="radio"/> Home<br><input type="radio"/> Ward<br><input type="radio"/> Medium Care<br><input type="radio"/> Intensive Care                                                                                                                                                                                                                                                                                                                                                                                                                                                                                                                                                                                                                                                                                                                                                                                                                                                                                                                         |
| Neonatal: date of transfer                   | (dd-mm-yyyy)                                                                                                                                                                                                                                                                                                                                                                                                                                                                                                                                                                                                                                                                                                                                                                                                                                                                                                                                                                                                                                                  |
| Neonatal: type of admission after transfer   | <input type="radio"/> Ward<br><input type="radio"/> Medium Care                                                                                                                                                                                                                                                                                                                                                                                                                                                                                                                                                                                                                                                                                                                                                                                                                                                                                                                                                                                               |

|                                                                                                                                                    |                                                                                        |
|----------------------------------------------------------------------------------------------------------------------------------------------------|----------------------------------------------------------------------------------------|
|                                                                                                                                                    | <input type="radio"/> Intensive Care                                                   |
| Neonatal: date of final discharge to home                                                                                                          | (dd-mm-yyyy)                                                                           |
| Neonatal weight at time of discharge                                                                                                               | (grams)                                                                                |
| Did the neonate receive iv glucose infusion postpartum?                                                                                            | <input type="radio"/> Yes<br><input type="radio"/> No<br><input type="radio"/> Unknown |
| How many days of iv glucose infusion?                                                                                                              | (days)                                                                                 |
| <b>Diabetes treatment</b>                                                                                                                          |                                                                                        |
| What treatment was the participant randomized to?                                                                                                  | <input type="radio"/> Insulin<br><input type="radio"/> Oral hypoglycemic agents        |
| Did the participant ever use: metformin                                                                                                            | <input type="radio"/> Yes<br><input type="radio"/> No<br><input type="radio"/> Unknown |
| On which date did the participant start with metformin?                                                                                            | (dd-mm-yyyy)                                                                           |
| On which date did the participant stop with metformin?                                                                                             | (dd-mm-yyyy)                                                                           |
| Did the participant ever use: glibenclamide                                                                                                        | <input type="radio"/> Yes<br><input type="radio"/> No<br><input type="radio"/> Unknown |
| On which date did the participant start with glibenclamide?                                                                                        | (dd-mm-yyyy)                                                                           |
| On which date did the participant stop with glibenclamide?                                                                                         | (dd-mm-yyyy)                                                                           |
| Did the participant ever use: insulin?                                                                                                             | <input type="radio"/> Yes<br><input type="radio"/> No<br><input type="radio"/> Unknown |
| On which date did the participant start with insulin?<br>(If multiple types of insulin were used, use the start date of the first type of insulin) | (dd-mm-yyyy)                                                                           |
| On which date did the participant stop with insulin?<br>(If multiple types of insulin were used, use the start date of the first type of insulin)  | (dd-mm-yyyy)                                                                           |
| Glucose profile most recent before or at randomization: fasting value                                                                              | (mmol/L)                                                                               |
| Glucose profile most recent before or at randomization: after breakfast value                                                                      | (mmol/L)                                                                               |
| Glucose profile most recent before or at randomization: after lunch value                                                                          | (mmol/L)                                                                               |
| Glucose profile most recent before or at randomization: after dinner value                                                                         | (mmol/L)                                                                               |
| Most recent HbA1c value before or at randomization                                                                                                 | (mmol/mol)                                                                             |
| Date of most recent HbA1c value before or at randomization                                                                                         | (dd-mm-yyyy)                                                                           |
| HbA1c value at 30-31 weeks of gestation                                                                                                            | (mmol/mol)                                                                             |
| Date of HbA1c value at 30-31 weeks of gestation                                                                                                    | (dd-mm-yyyy)                                                                           |

|                                                                                                                                                                  |                                                                                                                                                                                                                                                                                                                                                                                                                                                                                  |
|------------------------------------------------------------------------------------------------------------------------------------------------------------------|----------------------------------------------------------------------------------------------------------------------------------------------------------------------------------------------------------------------------------------------------------------------------------------------------------------------------------------------------------------------------------------------------------------------------------------------------------------------------------|
| HbA1c value at 35-36 weeks of gestation                                                                                                                          | (mmol/mol)                                                                                                                                                                                                                                                                                                                                                                                                                                                                       |
| Date of HbA1c value at 35-36 weeks of gestation                                                                                                                  | (dd-mm-yyyy)                                                                                                                                                                                                                                                                                                                                                                                                                                                                     |
| <b>Additional tests</b>                                                                                                                                          |                                                                                                                                                                                                                                                                                                                                                                                                                                                                                  |
| Umbilical cord blood C-peptide value                                                                                                                             | (pmol/L)                                                                                                                                                                                                                                                                                                                                                                                                                                                                         |
| Umbilical cord blood glucose value                                                                                                                               | (mmol/L)                                                                                                                                                                                                                                                                                                                                                                                                                                                                         |
| Umbilical cord blood insulin value                                                                                                                               | (mIU/L)                                                                                                                                                                                                                                                                                                                                                                                                                                                                          |
| Umbilical cord blood fructosamine value                                                                                                                          | (µmol/L)                                                                                                                                                                                                                                                                                                                                                                                                                                                                         |
| Umbilical cord blood triglycerides                                                                                                                               | (mmol/L)                                                                                                                                                                                                                                                                                                                                                                                                                                                                         |
| <b>End of study</b>                                                                                                                                              |                                                                                                                                                                                                                                                                                                                                                                                                                                                                                  |
| Was there a protocol violation?                                                                                                                                  | <input type="radio"/> No<br><input type="radio"/> Yes<br><input type="radio"/> Unknown                                                                                                                                                                                                                                                                                                                                                                                           |
| Did a Serious Adverse Event (SAE) occur during the study until 6 weeks postpartum?<br>(If yes, please report the SAE to the sponsor)                             | <input type="radio"/> No<br><input type="radio"/> Yes<br><input type="radio"/> Unknown                                                                                                                                                                                                                                                                                                                                                                                           |
| Did a Suspected Unexpected Serious Adverse Reaction (SUSAR) occur during the study until 6 weeks postpartum?<br>(If yes, please report the SUSAR to the sponsor) | <input type="radio"/> No<br><input type="radio"/> Yes<br><input type="radio"/> Unknown                                                                                                                                                                                                                                                                                                                                                                                           |
| Please specify if the subject completed the entire course of the study as specified in the study protocol or discontinued the study:                             | <input type="radio"/> Completed<br><input type="radio"/> Discontinued                                                                                                                                                                                                                                                                                                                                                                                                            |
| If discontinued, please specify the most appropriate reason for early termination                                                                                | <input type="radio"/> Subject violates one or more of the inclusion/exclusion criteria<br><input type="radio"/> Adverse event<br><input type="radio"/> Participant deceased<br><input type="radio"/> Participant lost to follow up<br><input type="radio"/> Participant withdrew consent to use personal data<br><input type="radio"/> Investigator's and/or physician's decision<br><input type="radio"/> Total study is early terminated<br><input type="radio"/> Other reason |
| Has the participant signed informed consent for follow-up?                                                                                                       | <input type="radio"/> Yes<br><input type="radio"/> No                                                                                                                                                                                                                                                                                                                                                                                                                            |
| Has the participant provided contact information to allow follow-up?                                                                                             | <input type="radio"/> Yes<br><input type="radio"/> No                                                                                                                                                                                                                                                                                                                                                                                                                            |

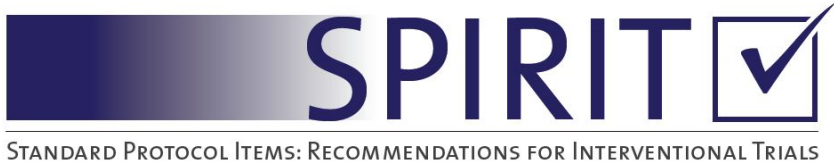

1  
2  
3  
4  
5  
6  
7  
8  
9  
10  
11  
12  
13  
14  
15  
16  
17  
18  
19  
20  
21  
22  
23  
24  
25  
26  
27  
28  
29  
30  
31  
32  
33  
34  
35  
36  
37  
38  
39  
40  
41  
42  
43  
44  
45  
46

**SPIRIT 2013 Checklist: Recommended items to address in a clinical trial protocol and related documents\***

Page numbers displayed at each item concern the pages in the protocol manuscript  
 For applicable items which are not incorporated in the protocol manuscript, we reference to the publically available study protocol document.

| Section/item                      | Item No | Description                                                                                                                                                                                                                                                                              | Addressed on page number   |
|-----------------------------------|---------|------------------------------------------------------------------------------------------------------------------------------------------------------------------------------------------------------------------------------------------------------------------------------------------|----------------------------|
| <b>Administrative information</b> |         |                                                                                                                                                                                                                                                                                          |                            |
| Title                             | 1       | Descriptive title identifying the study design, population, interventions, and, if applicable, trial acronym                                                                                                                                                                             | 1_____                     |
| Trial registration                | 2a      | Trial identifier and registry name. If not yet registered, name of intended registry                                                                                                                                                                                                     | 7 + 13_____                |
|                                   | 2b      | All items from the World Health Organization Trial Registration Data Set                                                                                                                                                                                                                 | Included in registry       |
| Protocol version                  | 3       | Date and version identifier                                                                                                                                                                                                                                                              | Trial website              |
| Funding                           | 4       | Sources and types of financial, material, and other support                                                                                                                                                                                                                              | 22_____                    |
| Roles and responsibilities        | 5a      | Names, affiliations, and roles of protocol contributors                                                                                                                                                                                                                                  | 1-6 and 21-22____          |
|                                   | 5b      | Name and contact information for the trial sponsor                                                                                                                                                                                                                                       | 22_____                    |
|                                   | 5c      | Role of study sponsor and funders, if any, in study design; collection, management, analysis, and interpretation of data; writing of the report; and the decision to submit the report for publication, including whether they will have ultimate authority over any of these activities | NA, investigator initiated |

|    |                                                           |     |                                                                                                                                                                                                                                                                  |                                     |
|----|-----------------------------------------------------------|-----|------------------------------------------------------------------------------------------------------------------------------------------------------------------------------------------------------------------------------------------------------------------|-------------------------------------|
| 1  |                                                           | 5d  | Composition, roles, and responsibilities of the coordinating centre, steering committee, endpoint adjudication committee, data management team, and other individuals or groups overseeing the trial, if applicable (see Item 21a for data monitoring committee) | Publically available study protocol |
| 2  |                                                           |     |                                                                                                                                                                                                                                                                  |                                     |
| 3  |                                                           |     |                                                                                                                                                                                                                                                                  |                                     |
| 4  |                                                           |     |                                                                                                                                                                                                                                                                  |                                     |
| 5  |                                                           |     |                                                                                                                                                                                                                                                                  |                                     |
| 6  | <b>Introduction</b>                                       |     |                                                                                                                                                                                                                                                                  |                                     |
| 7  |                                                           |     |                                                                                                                                                                                                                                                                  |                                     |
| 8  | Background and rationale                                  | 6a  | Description of research question and justification for undertaking the trial, including summary of relevant studies (published and unpublished) examining benefits and harms for each intervention                                                               | 10-12_____                          |
| 9  |                                                           |     |                                                                                                                                                                                                                                                                  |                                     |
| 10 |                                                           |     |                                                                                                                                                                                                                                                                  |                                     |
| 11 |                                                           | 6b  | Explanation for choice of comparators                                                                                                                                                                                                                            | 10-12_____                          |
| 12 |                                                           |     |                                                                                                                                                                                                                                                                  |                                     |
| 13 | Objectives                                                | 7   | Specific objectives or hypotheses                                                                                                                                                                                                                                | 12_____                             |
| 14 |                                                           |     |                                                                                                                                                                                                                                                                  |                                     |
| 15 | Trial design                                              | 8   | Description of trial design including type of trial (eg, parallel group, crossover, factorial, single group), allocation ratio, and framework (eg, superiority, equivalence, noninferiority, exploratory)                                                        | 12_____                             |
| 16 |                                                           |     |                                                                                                                                                                                                                                                                  |                                     |
| 17 |                                                           |     |                                                                                                                                                                                                                                                                  |                                     |
| 18 |                                                           |     |                                                                                                                                                                                                                                                                  |                                     |
| 19 | <b>Methods: Participants, interventions, and outcomes</b> |     |                                                                                                                                                                                                                                                                  |                                     |
| 20 |                                                           |     |                                                                                                                                                                                                                                                                  |                                     |
| 21 | Study setting                                             | 9   | Description of study settings (eg, community clinic, academic hospital) and list of countries where data will be collected. Reference to where list of study sites can be obtained                                                                               | 12_____                             |
| 22 |                                                           |     |                                                                                                                                                                                                                                                                  |                                     |
| 23 |                                                           |     |                                                                                                                                                                                                                                                                  |                                     |
| 24 | Eligibility criteria                                      | 10  | Inclusion and exclusion criteria for participants. If applicable, eligibility criteria for study centres and individuals who will perform the interventions (eg, surgeons, psychotherapists)                                                                     | 13-14_____                          |
| 25 |                                                           |     |                                                                                                                                                                                                                                                                  |                                     |
| 26 |                                                           |     |                                                                                                                                                                                                                                                                  |                                     |
| 27 | Interventions                                             | 11a | Interventions for each group with sufficient detail to allow replication, including how and when they will be administered                                                                                                                                       | 14-15_____                          |
| 28 |                                                           |     |                                                                                                                                                                                                                                                                  |                                     |
| 29 |                                                           |     |                                                                                                                                                                                                                                                                  |                                     |
| 30 |                                                           | 11b | Criteria for discontinuing or modifying allocated interventions for a given trial participant (eg, drug dose change in response to harms, participant request, or improving/worsening disease)                                                                   | 14-15_____                          |
| 31 |                                                           |     |                                                                                                                                                                                                                                                                  |                                     |
| 32 |                                                           |     |                                                                                                                                                                                                                                                                  |                                     |
| 33 |                                                           | 11c | Strategies to improve adherence to intervention protocols, and any procedures for monitoring adherence (eg, drug tablet return, laboratory tests)                                                                                                                | 15_____                             |
| 34 |                                                           |     |                                                                                                                                                                                                                                                                  |                                     |
| 35 |                                                           |     |                                                                                                                                                                                                                                                                  |                                     |
| 36 |                                                           | 11d | Relevant concomitant care and interventions that are permitted or prohibited during the trial                                                                                                                                                                    | 15-16_____                          |
| 37 |                                                           |     |                                                                                                                                                                                                                                                                  |                                     |
| 38 |                                                           |     |                                                                                                                                                                                                                                                                  |                                     |
| 39 |                                                           |     |                                                                                                                                                                                                                                                                  |                                     |
| 40 |                                                           |     |                                                                                                                                                                                                                                                                  |                                     |
| 41 |                                                           |     |                                                                                                                                                                                                                                                                  |                                     |
| 42 |                                                           |     |                                                                                                                                                                                                                                                                  |                                     |
| 43 |                                                           |     |                                                                                                                                                                                                                                                                  |                                     |
| 44 |                                                           |     |                                                                                                                                                                                                                                                                  |                                     |
| 45 |                                                           |     |                                                                                                                                                                                                                                                                  |                                     |
| 46 |                                                           |     |                                                                                                                                                                                                                                                                  |                                     |

|    |                      |    |                                                                                                                                                                                                                                                                                                                                                                                |            |
|----|----------------------|----|--------------------------------------------------------------------------------------------------------------------------------------------------------------------------------------------------------------------------------------------------------------------------------------------------------------------------------------------------------------------------------|------------|
| 1  | Outcomes             | 12 | Primary, secondary, and other outcomes, including the specific measurement variable (eg, systolic blood pressure), analysis metric (eg, change from baseline, final value, time to event), method of aggregation (eg, median, proportion), and time point for each outcome. Explanation of the clinical relevance of chosen efficacy and harm outcomes is strongly recommended | 16-17_____ |
| 2  |                      |    |                                                                                                                                                                                                                                                                                                                                                                                |            |
| 3  |                      |    |                                                                                                                                                                                                                                                                                                                                                                                |            |
| 4  |                      |    |                                                                                                                                                                                                                                                                                                                                                                                |            |
| 5  |                      |    |                                                                                                                                                                                                                                                                                                                                                                                |            |
| 6  | Participant timeline | 13 | Time schedule of enrolment, interventions (including any run-ins and washouts), assessments, and visits for participants. A schematic diagram is highly recommended (see Figure)                                                                                                                                                                                               | 15-17_____ |
| 7  |                      |    |                                                                                                                                                                                                                                                                                                                                                                                |            |
| 8  |                      |    |                                                                                                                                                                                                                                                                                                                                                                                |            |
| 9  | Sample size          | 14 | Estimated number of participants needed to achieve study objectives and how it was determined, including clinical and statistical assumptions supporting any sample size calculations                                                                                                                                                                                          | 18_____    |
| 10 |                      |    |                                                                                                                                                                                                                                                                                                                                                                                |            |
| 11 |                      |    |                                                                                                                                                                                                                                                                                                                                                                                |            |
| 12 |                      |    |                                                                                                                                                                                                                                                                                                                                                                                |            |
| 13 | Recruitment          | 15 | Strategies for achieving adequate participant enrolment to reach target sample size                                                                                                                                                                                                                                                                                            | 14_____    |
| 14 |                      |    |                                                                                                                                                                                                                                                                                                                                                                                |            |

**Methods: Assignment of interventions (for controlled trials)**

Allocation:

|    |                                  |     |                                                                                                                                                                                                                                                                                                                                                          |         |
|----|----------------------------------|-----|----------------------------------------------------------------------------------------------------------------------------------------------------------------------------------------------------------------------------------------------------------------------------------------------------------------------------------------------------------|---------|
| 19 | Sequence generation              | 16a | Method of generating the allocation sequence (eg, computer-generated random numbers), and list of any factors for stratification. To reduce predictability of a random sequence, details of any planned restriction (eg, blocking) should be provided in a separate document that is unavailable to those who enrol participants or assign interventions | 14_____ |
| 20 |                                  |     |                                                                                                                                                                                                                                                                                                                                                          |         |
| 21 |                                  |     |                                                                                                                                                                                                                                                                                                                                                          |         |
| 22 |                                  |     |                                                                                                                                                                                                                                                                                                                                                          |         |
| 23 |                                  |     |                                                                                                                                                                                                                                                                                                                                                          |         |
| 24 |                                  |     |                                                                                                                                                                                                                                                                                                                                                          |         |
| 25 | Allocation concealment mechanism | 16b | Mechanism of implementing the allocation sequence (eg, central telephone; sequentially numbered, opaque, sealed envelopes), describing any steps to conceal the sequence until interventions are assigned                                                                                                                                                | NA_____ |
| 26 |                                  |     |                                                                                                                                                                                                                                                                                                                                                          |         |
| 27 |                                  |     |                                                                                                                                                                                                                                                                                                                                                          |         |
| 28 |                                  |     |                                                                                                                                                                                                                                                                                                                                                          |         |
| 29 | Implementation                   | 16c | Who will generate the allocation sequence, who will enrol participants, and who will assign participants to interventions                                                                                                                                                                                                                                | 14_____ |
| 30 |                                  |     |                                                                                                                                                                                                                                                                                                                                                          |         |
| 31 |                                  |     |                                                                                                                                                                                                                                                                                                                                                          |         |
| 32 |                                  |     |                                                                                                                                                                                                                                                                                                                                                          |         |
| 33 | Blinding (masking)               | 17a | Who will be blinded after assignment to interventions (eg, trial participants, care providers, outcome assessors, data analysts), and how                                                                                                                                                                                                                | 11_____ |
| 34 |                                  |     |                                                                                                                                                                                                                                                                                                                                                          |         |
| 35 |                                  |     |                                                                                                                                                                                                                                                                                                                                                          |         |
| 36 |                                  | 17b | If blinded, circumstances under which unblinding is permissible, and procedure for revealing a participant's allocated intervention during the trial                                                                                                                                                                                                     | NA_____ |
| 37 |                                  |     |                                                                                                                                                                                                                                                                                                                                                          |         |
| 38 |                                  |     |                                                                                                                                                                                                                                                                                                                                                          |         |

**Methods: Data collection, management, and analysis**

|    |                            |     |                                                                                                               |                      |
|----|----------------------------|-----|---------------------------------------------------------------------------------------------------------------|----------------------|
| 1  | Data collection            | 18a | Plans for assessment and collection of outcome, baseline, and other trial data, including any related         | 29-41_____           |
| 2  | methods                    |     | processes to promote data quality (eg, duplicate measurements, training of assessors) and a description of    |                      |
| 3  |                            |     | study instruments (eg, questionnaires, laboratory tests) along with their reliability and validity, if known. |                      |
| 4  |                            |     | Reference to where data collection forms can be found, if not in the protocol                                 |                      |
| 5  |                            |     |                                                                                                               |                      |
| 6  |                            | 18b | Plans to promote participant retention and complete follow-up, including list of any outcome data to be       | Publically available |
| 7  |                            |     | collected for participants who discontinue or deviate from intervention protocols                             | study protocol       |
| 8  |                            |     |                                                                                                               |                      |
| 9  | Data management            | 19  | Plans for data entry, coding, security, and storage, including any related processes to promote data quality  | Publically available |
| 10 |                            |     | (eg, double data entry; range checks for data values). Reference to where details of data management          | study protocol       |
| 11 |                            |     | procedures can be found, if not in the protocol                                                               |                      |
| 12 |                            |     |                                                                                                               |                      |
| 13 |                            |     |                                                                                                               |                      |
| 14 | Statistical methods        | 20a | Statistical methods for analysing primary and secondary outcomes. Reference to where other details of the     | 18-19_____           |
| 15 |                            |     | statistical analysis plan can be found, if not in the protocol                                                |                      |
| 16 |                            |     |                                                                                                               |                      |
| 17 |                            | 20b | Methods for any additional analyses (eg, subgroup and adjusted analyses)                                      | 19_____              |
| 18 |                            |     |                                                                                                               |                      |
| 19 |                            | 20c | Definition of analysis population relating to protocol non-adherence (eg, as randomised analysis), and any    |                      |
| 20 |                            |     | statistical methods to handle missing data (eg, multiple imputation)                                          | 18_____              |
| 21 |                            |     |                                                                                                               |                      |
| 22 |                            |     |                                                                                                               |                      |
| 23 | <b>Methods: Monitoring</b> |     |                                                                                                               |                      |
| 24 |                            |     |                                                                                                               |                      |
| 25 | Data monitoring            | 21a | Composition of data monitoring committee (DMC); summary of its role and reporting structure; statement of     | Publically available |
| 26 |                            |     | whether it is independent from the sponsor and competing interests; and reference to where further details    | study protocol       |
| 27 |                            |     | about its charter can be found, if not in the protocol. Alternatively, an explanation of why a DMC is not     |                      |
| 28 |                            |     | needed                                                                                                        |                      |
| 29 |                            |     |                                                                                                               |                      |
| 30 |                            |     |                                                                                                               |                      |
| 31 |                            | 21b | Description of any interim analyses and stopping guidelines, including who will have access to these interim  | 17_____              |
| 32 |                            |     | results and make the final decision to terminate the trial                                                    |                      |
| 33 |                            |     |                                                                                                               |                      |
| 34 | Harms                      | 22  | Plans for collecting, assessing, reporting, and managing solicited and spontaneously reported adverse         | 17_____              |
| 35 |                            |     | events and other unintended effects of trial interventions or trial conduct                                   |                      |
| 36 |                            |     |                                                                                                               |                      |
| 37 | Auditing                   | 23  | Frequency and procedures for auditing trial conduct, if any, and whether the process will be independent      | 20_____              |
| 38 |                            |     | from investigators and the sponsor                                                                            |                      |
| 39 |                            |     |                                                                                                               |                      |
| 40 |                            |     |                                                                                                               |                      |

## 41 Ethics and dissemination



|    |                               |     |                                                                                                                                                                                                                                                                                     |                                          |
|----|-------------------------------|-----|-------------------------------------------------------------------------------------------------------------------------------------------------------------------------------------------------------------------------------------------------------------------------------------|------------------------------------------|
| 1  | Research ethics approval      | 24  | Plans for seeking research ethics committee/institutional review board (REC/IRB) approval                                                                                                                                                                                           | 20_____                                  |
| 2  |                               |     |                                                                                                                                                                                                                                                                                     |                                          |
| 3  |                               |     |                                                                                                                                                                                                                                                                                     |                                          |
| 4  | Protocol amendments           | 25  | Plans for communicating important protocol modifications (eg, changes to eligibility criteria, outcomes, analyses) to relevant parties (eg, investigators, REC/IRBs, trial participants, trial registries, journals, regulators)                                                    | 20_____                                  |
| 5  |                               |     |                                                                                                                                                                                                                                                                                     |                                          |
| 6  |                               |     |                                                                                                                                                                                                                                                                                     |                                          |
| 7  |                               |     |                                                                                                                                                                                                                                                                                     |                                          |
| 8  | Consent or assent             | 26a | Who will obtain informed consent or assent from potential trial participants or authorised surrogates, and how (see Item 32)                                                                                                                                                        | 13_____                                  |
| 9  |                               |     |                                                                                                                                                                                                                                                                                     |                                          |
| 10 |                               |     |                                                                                                                                                                                                                                                                                     |                                          |
| 11 |                               | 26b | Additional consent provisions for collection and use of participant data and biological specimens in ancillary studies, if applicable                                                                                                                                               | Publically available study protocol      |
| 12 |                               |     |                                                                                                                                                                                                                                                                                     |                                          |
| 13 |                               |     |                                                                                                                                                                                                                                                                                     |                                          |
| 14 | Confidentiality               | 27  | How personal information about potential and enrolled participants will be collected, shared, and maintained in order to protect confidentiality before, during, and after the trial                                                                                                | 19-20_____                               |
| 15 |                               |     |                                                                                                                                                                                                                                                                                     |                                          |
| 16 |                               |     |                                                                                                                                                                                                                                                                                     |                                          |
| 17 |                               |     |                                                                                                                                                                                                                                                                                     |                                          |
| 18 | Declaration of interests      | 28  | Financial and other competing interests for principal investigators for the overall trial and each study site                                                                                                                                                                       | 21_____                                  |
| 19 |                               |     |                                                                                                                                                                                                                                                                                     |                                          |
| 20 |                               |     |                                                                                                                                                                                                                                                                                     |                                          |
| 21 | Access to data                | 29  | Statement of who will have access to the final trial dataset, and disclosure of contractual agreements that limit such access for investigators                                                                                                                                     | Publically available study protocol_____ |
| 22 |                               |     |                                                                                                                                                                                                                                                                                     |                                          |
| 23 |                               |     |                                                                                                                                                                                                                                                                                     |                                          |
| 24 | Ancillary and post-trial care | 30  | Provisions, if any, for ancillary and post-trial care, and for compensation to those who suffer harm from trial participation                                                                                                                                                       | Publically available study protocol_____ |
| 25 |                               |     |                                                                                                                                                                                                                                                                                     |                                          |
| 26 |                               |     |                                                                                                                                                                                                                                                                                     |                                          |
| 27 | Dissemination policy          | 31a | Plans for investigators and sponsor to communicate trial results to participants, healthcare professionals, the public, and other relevant groups (eg, via publication, reporting in results databases, or other data sharing arrangements), including any publication restrictions | 20_____                                  |
| 28 |                               |     |                                                                                                                                                                                                                                                                                     |                                          |
| 29 |                               | 31b | Authorship eligibility guidelines and any intended use of professional writers                                                                                                                                                                                                      | NA_____                                  |
| 30 |                               |     |                                                                                                                                                                                                                                                                                     |                                          |
| 31 |                               | 31c | Plans, if any, for granting public access to the full protocol, participant-level dataset, and statistical code                                                                                                                                                                     | 20_____                                  |
| 32 |                               |     |                                                                                                                                                                                                                                                                                     |                                          |
| 33 |                               |     |                                                                                                                                                                                                                                                                                     |                                          |
| 34 |                               |     |                                                                                                                                                                                                                                                                                     |                                          |
| 35 |                               |     |                                                                                                                                                                                                                                                                                     |                                          |
| 36 | <b>Appendices</b>             |     |                                                                                                                                                                                                                                                                                     |                                          |
| 37 |                               |     |                                                                                                                                                                                                                                                                                     |                                          |
| 38 | Informed consent materials    | 32  | Model consent form and other related documentation given to participants and authorised surrogates                                                                                                                                                                                  | 20, study website                        |
| 39 |                               |     |                                                                                                                                                                                                                                                                                     |                                          |
| 40 |                               |     |                                                                                                                                                                                                                                                                                     |                                          |
| 41 |                               |     |                                                                                                                                                                                                                                                                                     |                                          |
| 42 |                               |     |                                                                                                                                                                                                                                                                                     |                                          |
| 43 |                               |     |                                                                                                                                                                                                                                                                                     |                                          |
| 44 |                               |     |                                                                                                                                                                                                                                                                                     |                                          |
| 45 |                               |     |                                                                                                                                                                                                                                                                                     |                                          |
| 46 |                               |     |                                                                                                                                                                                                                                                                                     |                                          |

1 Biological 33 Plans for collection, laboratory evaluation, and storage of biological specimens for genetic or molecular NA \_\_\_\_\_  
2 specimens analysis in the current trial and for future use in ancillary studies, if applicable  
3

---

4 \*It is strongly recommended that this checklist be read in conjunction with the SPIRIT 2013 Explanation & Elaboration for important clarification on the items.  
5 Amendments to the protocol should be tracked and dated. The SPIRIT checklist is copyrighted by the SPIRIT Group under the Creative Commons  
6 "[Attribution-NonCommercial-NoDerivs 3.0 Unported](#)" license.  
7  
8  
9  
10  
11  
12  
13  
14  
15  
16  
17  
18  
19  
20  
21  
22  
23  
24  
25  
26  
27  
28  
29  
30  
31  
32  
33  
34  
35  
36  
37  
38  
39  
40  
41  
42  
43  
44  
45  
46

For peer review only

# BMJ Open

## The SUGAR-DIP trial: oral medication strategy versus insulin for diabetes in pregnancy, study protocol for a multicenter, open label, non-inferiority, randomized controlled trial

|                               |                                                                                                                                                                                                                                                                                                                                                                                                                                                                                                                                                                                                                                                                                                                                                                                                                                                                                                                                                                                                                                                                                                                                                                                                                                                                                                                                                                                                                                                                                                                                                                                                                                                                                                                                                                                                                                                                                                                                                                                                                                                                                                                                                                                                                                                                                                                                                                                      |
|-------------------------------|--------------------------------------------------------------------------------------------------------------------------------------------------------------------------------------------------------------------------------------------------------------------------------------------------------------------------------------------------------------------------------------------------------------------------------------------------------------------------------------------------------------------------------------------------------------------------------------------------------------------------------------------------------------------------------------------------------------------------------------------------------------------------------------------------------------------------------------------------------------------------------------------------------------------------------------------------------------------------------------------------------------------------------------------------------------------------------------------------------------------------------------------------------------------------------------------------------------------------------------------------------------------------------------------------------------------------------------------------------------------------------------------------------------------------------------------------------------------------------------------------------------------------------------------------------------------------------------------------------------------------------------------------------------------------------------------------------------------------------------------------------------------------------------------------------------------------------------------------------------------------------------------------------------------------------------------------------------------------------------------------------------------------------------------------------------------------------------------------------------------------------------------------------------------------------------------------------------------------------------------------------------------------------------------------------------------------------------------------------------------------------------|
| Journal:                      | <i>BMJ Open</i>                                                                                                                                                                                                                                                                                                                                                                                                                                                                                                                                                                                                                                                                                                                                                                                                                                                                                                                                                                                                                                                                                                                                                                                                                                                                                                                                                                                                                                                                                                                                                                                                                                                                                                                                                                                                                                                                                                                                                                                                                                                                                                                                                                                                                                                                                                                                                                      |
| Manuscript ID                 | bmjopen-2019-029808.R1                                                                                                                                                                                                                                                                                                                                                                                                                                                                                                                                                                                                                                                                                                                                                                                                                                                                                                                                                                                                                                                                                                                                                                                                                                                                                                                                                                                                                                                                                                                                                                                                                                                                                                                                                                                                                                                                                                                                                                                                                                                                                                                                                                                                                                                                                                                                                               |
| Article Type:                 | Protocol                                                                                                                                                                                                                                                                                                                                                                                                                                                                                                                                                                                                                                                                                                                                                                                                                                                                                                                                                                                                                                                                                                                                                                                                                                                                                                                                                                                                                                                                                                                                                                                                                                                                                                                                                                                                                                                                                                                                                                                                                                                                                                                                                                                                                                                                                                                                                                             |
| Date Submitted by the Author: | 11-Apr-2019                                                                                                                                                                                                                                                                                                                                                                                                                                                                                                                                                                                                                                                                                                                                                                                                                                                                                                                                                                                                                                                                                                                                                                                                                                                                                                                                                                                                                                                                                                                                                                                                                                                                                                                                                                                                                                                                                                                                                                                                                                                                                                                                                                                                                                                                                                                                                                          |
| Complete List of Authors:     | <p>de Wit, Leon; University Medical Center Utrecht, Utrecht University, Department of Obstetrics and Gynaecology<br/>           Rademaker, D.; Amsterdam University Medical Centers, University of Amsterdam, Department of Obstetrics &amp; Gynaecology<br/>           Voormolen, D.; University Medical Center Utrecht, Utrecht University, Department of Obstetrics &amp; Gynaecology<br/>           Akerboom, B.; Albert Schweitzer Hospital, Department of Obstetrics &amp; Gynaecology<br/>           Kiewiet-Kemper, R.; Albert Schweitzer Hospital, Department of Internal Medicine<br/>           Soeters, M.; Amsterdam University Medical Centers, University of Amsterdam, Department of Endocrinology &amp; Metabolism<br/>           Verwij-Didden, M.; Bernhoven Hospital, Department of Obstetrics &amp; Gynaecology<br/>           Assouiki, F.; Bernhoven Hospital, Department of Internal Medicine<br/>           Schippers, D.; Canisius Wilhelmina Hospital, Department of Obstetrics &amp; Gynaecology<br/>           Vermeulen, M.; Canisius Wilhelmina Hospital, Department of Internal Medicine<br/>           Kuppens, S.; Catharina Hospital, Department of Obstetrics &amp; Gynaecology<br/>           Oosterwerff, M.; Catharina Hospital, Department of Internal Medicine<br/>           Zwart, J.; Deventer Hospital, Department of Obstetrics &amp; Gynaecology<br/>           Diekman, M.; Deventer Hospital, Department of Internal Medicine<br/>           Vogelvang, T.; Diaconessenhuis Utrecht, Department of Obstetrics &amp; Gynaecology<br/>           Gallas, P.; Diaconessenhuis Utrecht, Department of Internal Medicine<br/>           Galjaard, S.; Erasmus MC University Medical Center Rotterdam, Department of Obstetrics and Prenatal Medicine<br/>           Visser, W.; Erasmus MC University Medical Center Rotterdam, Department of Obstetrics and Prenatal Medicine<br/>           Horree, N.; Flevoziekenhuis, Department of Obstetrics &amp; Gynaecology<br/>           Klooker, T.; Flevoziekenhuis, Department of Internal Medicine<br/>           Laan, R.; Gelderse Vallei Hospital, Department of Obstetrics &amp; Gynaecology<br/>           Heijligenberg, R.; Gelderse Vallei Hospital, Department of Internal Medicine<br/>           Huisjes, A.; Gelre Hospitals, Department of Obstetrics &amp; Gynaecology</p> |

|    |                                                                          |
|----|--------------------------------------------------------------------------|
| 1  |                                                                          |
| 2  |                                                                          |
| 3  |                                                                          |
| 4  | van Bommel, T.; Gelre Hospitals, Department of Internal Medicine         |
| 5  | van Meir, C.; Groene Hart Hospital, Department of Obstetrics &           |
| 6  | Gynaecology                                                              |
| 7  | van den Beld, A.; Groene Hart Hospital, Department of Internal Medicine  |
| 8  | Hermes, W.; Haaglanden Medical Center, Department of Obstetrics &        |
| 9  | Gynaecology                                                              |
| 10 | Vidarsdottir, S.; Haaglanden Medical Center, Department of Internal      |
| 11 | Medicine                                                                 |
| 12 | Veldhuis-Vlug, A.; Medical Center Jan van Goyen, Department of Internal  |
| 13 | Medicine                                                                 |
| 14 | Dullemond, R.; Jeroen Bosch Hospital, Department of Obstetrics &         |
| 15 | Gynaecology                                                              |
| 16 | Jansen, H. J.; Jeroen Bosch Hospital, Department of Internal Medicine    |
| 17 | Sueters, M.; Leiden University Medical Center, Department of Obstetrics  |
| 18 | & Gynaecology                                                            |
| 19 | de Koning, E.; Leiden University Medical Center, Department of Medicine  |
| 20 | van Laar, J.; Máxima Medical Center, Department of Obstetrics &          |
| 21 | Gynaecology                                                              |
| 22 | Wouters-van Poppel, P.; Máxima Medical Center, Department of Internal    |
| 23 | Medicine                                                                 |
| 24 | Sanson-van Praag, M.; Meander Medical Center, Department of Internal     |
| 25 | Medicine                                                                 |
| 26 | van den Akker, E.; OLVG, Department of Obstetrics & Gynaecology          |
| 27 | Brouwer, C.; OLVG, Department of Internal Medicine                       |
| 28 | Hermesen, B.; OLVG, Department of Obstetrics & Gynaecology               |
| 29 | Potter van Loon, B.; OLVG, Department of Internal Medicine               |
| 30 | van der Heijden, O.; Radboud University Medical Center Nijmegen,         |
| 31 | Department of Obstetrics & Gynaecology                                   |
| 32 | de Galan, B.; Radboud University Medical Center Nijmegen, Department     |
| 33 | of Internal Medicine                                                     |
| 34 | van Leeuwen, M.; Reinier de Graaf Hospital, Department of Obstetrics &   |
| 35 | Gynaecology                                                              |
| 36 | Wijbenga, J.; Reinier de Graaf Hospital, Department of Internal Medicine |
| 37 | de Boer, K.; Rijnstate Hospital, Department of Obstetrics & Gynaecology  |
| 38 | van Bon, A.; Rijnstate Hospital, Department of Internal Medicine         |
| 39 | van der Made, F.; Franciscus Gasthuis & Vlietland, Department of         |
| 40 | Obstetrics & Gynaecology                                                 |
| 41 | Eskes, S.; Franciscus Gasthuis & Vlietland, Department of Internal       |
| 42 | Medicine                                                                 |
| 43 | Zandstra, M.; Spaarne Gasthuis, Department of Obstetrics &               |
| 44 | Gynaecology                                                              |
| 45 | van Houtum, W.; Spaarne Gasthuis, Department of Internal Medicine        |
| 46 | Braams-Lisman, B.; Tergooi, Department of Obstetrics & Gynaecology       |
| 47 | Daemen-Gubbels, C.; Tergooi, Department of Internal Medicine             |
| 48 | Wouters, Maurice ; Amsterdam UMC, VU University Medical Center,          |
| 49 | Department of Obstetrics & Gynaecology                                   |
| 50 | IJzerman, R.; Amsterdam UMC, VU University Medical Center,               |
| 51 | Department of Internal Medicine                                          |
| 52 | Mensing van Charante, N.; Dijklander Hospital, Department of Obstetrics  |
| 53 | & Gynaecology                                                            |
| 54 | Zwertbroek, R.; Dijklander Hospital, Department of Internal Medicine     |
| 55 | Bosmans, J; VU University Amsterdam, Department of Health Sciences,      |
| 56 | Faculty of Science                                                       |
| 57 | Evers, I.; Meander Medical Center, Department of Obstetrics &            |
| 58 | Gynaecology                                                              |
| 59 | Mol, Ben; School of Medicine, Monash University, Melbourne, Australia,   |
| 60 | Department of Obstetrics and Gynaecology                                 |
|    | de Valk, H.; University Medical Center Utrecht, Utrecht University,      |
|    | Department of Internal Medicine & Endocrinology                          |
|    | Groenendaal, Floris ; University Medical Center Utrecht, Utrecht         |
|    | University, Department of Neonatology                                    |

|                                 |                                                                                                                                                                                                                                                                                                                                                                                                                                                                                                                                                                                                                                                                                         |
|---------------------------------|-----------------------------------------------------------------------------------------------------------------------------------------------------------------------------------------------------------------------------------------------------------------------------------------------------------------------------------------------------------------------------------------------------------------------------------------------------------------------------------------------------------------------------------------------------------------------------------------------------------------------------------------------------------------------------------------|
|                                 | Naaktgeboren, CA ; University Medical Center Utrecht, Utrecht University, Julius Center for Health Sciences & Primary Care Painter, Rebecca; Amsterdam University Medical Centers, University of Amsterdam, Department of Obstetrics & Gynaecology de Vries, Hans; Amsterdam University Medical Centers, University of Amsterdam, Department of Internal Medicine Franx, Arie; University Medical Center Utrecht, Utrecht University, Department of Obstetrics & Gynaecology van Rijn, Bas; University Medical Center Utrecht, Utrecht University, Department of Obstetrics & Gynaecology; Erasmus MC University Medical Center Rotterdam, Department of Obstetrics & Prenatal Medicine |
| <b>Primary Subject Heading</b>: | Obstetrics and gynaecology                                                                                                                                                                                                                                                                                                                                                                                                                                                                                                                                                                                                                                                              |
| Secondary Subject Heading:      | Diabetes and endocrinology, Obstetrics and gynaecology                                                                                                                                                                                                                                                                                                                                                                                                                                                                                                                                                                                                                                  |
| Keywords:                       | Diabetes in pregnancy < DIABETES & ENDOCRINOLOGY, Clinical trials < THERAPEUTICS, Maternal medicine < OBSTETRICS                                                                                                                                                                                                                                                                                                                                                                                                                                                                                                                                                                        |
|                                 |                                                                                                                                                                                                                                                                                                                                                                                                                                                                                                                                                                                                                                                                                         |

SCHOLARONE™  
Manuscripts

# The SUGAR-DIP trial: oral medication strategy versus insulin for diabetes in pregnancy, study protocol for a multicenter, open label, non-inferiority, randomized controlled trial

1. L. de Wit, M.D., Department of Obstetrics and Gynaecology, University Medical Center Utrecht, Utrecht University, Lundlaan 6, 3508 AB, Utrecht, the Netherlands. [l.dewit-3@umcutrecht.nl](mailto:l.dewit-3@umcutrecht.nl)
2. D. Rademaker, M.D., Department of Obstetrics and Gynaecology, Amsterdam University Medical Centers, University of Amsterdam, Meibergdreef 9, 1105 AZ, Amsterdam, the Netherlands. [d.rademaker@amc.uva.nl](mailto:d.rademaker@amc.uva.nl)
3. D.N. Voormolen, M.D. Ph.D., Department of Obstetrics and Gynaecology, University Medical Center Utrecht, Utrecht University, Lundlaan 6, 3508 AB, Utrecht, the Netherlands. [d.p.vanmunster-2@umcutrecht.nl](mailto:d.p.vanmunster-2@umcutrecht.nl)
4. B.M.C. Akerboom, M.D., Department of Obstetrics and Gynaecology, Albert Schweitzer Hospital, Albert Schweitzerplaats 25, 3318 AT, Dordrecht, the Netherlands. [b.akerboom@asz.nl](mailto:b.akerboom@asz.nl)
5. R.M. Kiewiet-Kemper, M.D. Ph.D., Department of Internal Medicine, Albert Schweitzer Hospital, Albert Schweitzerplaats 25, 3318 AT, Dordrecht, the Netherlands. [r.kiewiet@asz.nl](mailto:r.kiewiet@asz.nl)
6. M.R. Soeters, M.D. Ph.D., Department of Endocrinology and Metabolism, Amsterdam University Medical Centers, University of Amsterdam, Meibergdreef 9, 1105 AZ, Amsterdam, the Netherlands. [m.r.soeters@amc.uva.nl](mailto:m.r.soeters@amc.uva.nl)
7. M.A.L. Verwij-Didden, M.D., Department of Obstetrics and Gynaecology, Bernhoven Hospital, Nistelrodeseweg 10, 5406 PT, Uden, the Netherlands. [m.verwij@bernhoven.nl](mailto:m.verwij@bernhoven.nl)
8. F. Assouiki, M.D., Department of Internal Medicine, Bernhoven Hospital, Nistelrodeseweg 10, 5406 PT, Uden, the Netherlands. [f.assouiki@bernhoven.nl](mailto:f.assouiki@bernhoven.nl)
9. D.H. Schippers, M.D., Department of Obstetrics and Gynaecology, Canisius Wilhelmina Hospital, Weg door Jonkerbos 100, 6532 DZ, Nijmegen, the Netherlands. [d.schippers@cwz.nl](mailto:d.schippers@cwz.nl)
10. M.A.R. Vermeulen, M.D. Ph.D., Department of Internal Medicine, Canisius Wilhelmina Hospital, Weg door Jonkerbos 100, 6532, DZ, Nijmegen, the Netherlands. [mar.vermeulen@cwz.nl](mailto:mar.vermeulen@cwz.nl)
11. S.M.I. Kuppens, M.D. Ph.D., Department of Obstetrics and Gynaecology, Catharina Hospital, Michelangelolaan 2, 5623 EJ, Eindhoven, the Netherlands. [simone.kuppens@catharinaziekenhuis.nl](mailto:simone.kuppens@catharinaziekenhuis.nl)
12. M.M. Oosterwerff, M.D. Ph.D., Department of Internal Medicine, Catharina Hospital, Michelangelolaan 2, 5623 EJ, Eindhoven, the Netherlands. [mirjam.oosterwerff@catharinaziekenhuis.nl](mailto:mirjam.oosterwerff@catharinaziekenhuis.nl)

13. J.J. Zwart, M.D. Ph.D., Department of Obstetrics and Gynaecology, Deventer Hospital, Nico Bolkesteinlaan 75, 7416 SE, Deventer, the Netherlands. [j.zwart@dz.nl](mailto:j.zwart@dz.nl)
14. M.J.M. Diekman, M.D. Ph.D., Department of Internal Medicine, Deventer Hospital, Nico Bolkesteinlaan 75, 7416 SE, Deventer, the Netherlands. [m.j.m.diekman@dz.nl](mailto:m.j.m.diekman@dz.nl)
15. T.E. Vogelvang, M.D. Ph.D., Department of Obstetrics and Gynaecology, Diaconessenhuis Utrecht, Bosboomstraat 1, 3582 KE, Utrecht, the Netherlands. [t.vogelvang@diakhuis.nl](mailto:t.vogelvang@diakhuis.nl)
16. P.R.J. Gallas, M.D. Ph.D., Department of Internal Medicine, Diaconessenhuis Utrecht, Bosboomstraat 1, 3582 KE, Utrecht, the Netherlands. [rgallas@diakhuis.nl](mailto:rgallas@diakhuis.nl)
17. S. Galjaard, M.D. Ph.D., Department of Obstetrics and Prenatal Medicine, Erasmus MC University Medical Center Rotterdam, Doctor Molewaterplein 40, 3015 GD, Rotterdam, the Netherlands. [s.galjaard@erasmusmc.nl](mailto:s.galjaard@erasmusmc.nl)
18. W. Visser, M.D. Ph.D., Department of Obstetrics and Prenatal Medicine, Erasmus MC University Medical Center Rotterdam, Doctor Molewaterplein 40, 3015 GD, Rotterdam, the Netherlands. [willy.visser@erasmusmc.nl](mailto:willy.visser@erasmusmc.nl)
19. N. Horree, M.D. Ph.D., Department of Obstetrics and Gynaecology, Flevoziekenhuis, Hospitaalweg 1, 1315 RA, Almere, the Netherlands. [nhorree@flevoziekenhuis.nl](mailto:nhorree@flevoziekenhuis.nl)
20. T.K. Klooker, M.D. Ph.D., Department of Internal Medicine, Flevoziekenhuis, Hospitaalweg 1, 1315 RA, Almere, the Netherlands. [tklooker@flevoziekenhuis.nl](mailto:tklooker@flevoziekenhuis.nl)
21. R. Laan, M.D., Department of Obstetrics and Gynaecology, Gelderse Vallei Hospital, Willy Brandtlaan 10, 6716 RP, Ede, the Netherlands. [laanr@zgv.nl](mailto:laanr@zgv.nl)
22. R. Heijligenberg, M.D. Ph.D., Department of Internal Medicine, Gelderse Vallei Hospital, Willy Brandtlaan 10, 7616 RP, Ede, the Netherlands. [heijligenbergr@zgv.nl](mailto:heijligenbergr@zgv.nl)
23. A.J.M. Huisjes, M.D., Department of Obstetrics and Gynaecology, Gelre Hospitals, Albert Schweitzerlaan 31, 7334 DZ, Apeldoorn, the Netherlands. [a.huisjes@gelre.nl](mailto:a.huisjes@gelre.nl)
24. T. van Bommel, M.D. Ph.D., Department of Internal Medicine, Gelre Hospitals, Albert Schweitzerlaan 31, 7334 DZ, Apeldoorn, the Netherlands. [t.van.bommel@gelre.nl](mailto:t.van.bommel@gelre.nl)
25. C.A. van Meir, M.D. Ph.D., Department of Obstetrics and Gynaecology, Groene Hart Hospital, Bleulandweg 10, 2803 HH, Gouda, the Netherlands. [claudia.van.meir@ghz.nl](mailto:claudia.van.meir@ghz.nl)
26. A.W. van den Beld, M.D. Ph.D., Department of Internal Medicine, Groene Hart Hospital, Bleulandweg 10, 2803 HH, Gouda, the Netherlands. [Annewieke.van.den.beld@ghz.nl](mailto:Annewieke.van.den.beld@ghz.nl)
27. W. Hermes, M.D. Ph.D., Department of Obstetrics and Gynaecology, Haaglanden Medical Center, Lijnbaan 32, 2512 VA, the Hague, the Netherlands. [w.hermes@haaglandenmc.nl](mailto:w.hermes@haaglandenmc.nl)

- 1
- 2
- 3
- 4 28. S. Vidarsdottir, M.D. Ph.D., Department of Internal Medicine, Haaglanden Medical Center, Lijnbaan
- 5 32, 2512 VA, the Hague, the Netherlands. [s.johannssonvidarsdottir@haaglandenmc.nl](mailto:s.johannssonvidarsdottir@haaglandenmc.nl)
- 6
- 7 29. A.G. Veldhuis-Vlug, M.D. Ph.D., Department of Internal Medicine, Medical Center Jan van Goyen,
- 8 Jan van Goyenkade 1, 1075 HN, Amsterdam, the Netherlands. [aveldhuis@jvg.nl](mailto:aveldhuis@jvg.nl)
- 9
- 10 30. R.C. Dullemond, M.D., Department of Obstetrics and Gynaecology, Jeroen Bosch Hospital, Henri
- 11 Dunantstraat 1, 5223 GZ, 's-Hertogenbosch, the Netherlands. [r.dullemond@jbz.nl](mailto:r.dullemond@jbz.nl)
- 12
- 13 31. H.J. Jansen, M.D. Ph.D., Department of Internal Medicine, Jeroen Bosch Hospital, Henri
- 14 Dunantstraat 1, 5223 GZ, 's-Hertogenbosch, the Netherlands, [h.jansen@jbz.nl](mailto:h.jansen@jbz.nl)
- 15
- 16 32. M. Sueters, M.D. Ph.D., Department of Obstetrics and Gynaecology, Leiden University Medical
- 17 Center, Albinusdreef 2, 2333 ZA, Leiden, the Netherlands. [m.sueters@lumc.nl](mailto:m.sueters@lumc.nl)
- 18
- 19 33. E.J.P. de Koning, M.D. Ph.D., Department of Medicine, Leiden University Medical Center,
- 20 Albinusdreef 2, 2333 ZA, Leiden, the Netherlands. [e.dekoning@lumc.nl](mailto:e.dekoning@lumc.nl)
- 21
- 22
- 23 34. J.O.E.H. van Laar, M.D. Ph.D., Department of Obstetrics and Gynaecology, Máxima Medical Center,
- 24 De Run 4600, 5504 DB, Veldhoven, the Netherlands. [judith.van.laar@mmc.nl](mailto:judith.van.laar@mmc.nl)
- 25
- 26 35. P. Wouters-van Poppel, M.D. Ph.D., Department of Internal Medicine, Máxima Medical Center, De
- 27 Run 4600, 5504 DB, Veldhoven, the Netherlands. [Pleun.van.poppel@mmc.nl](mailto:Pleun.van.poppel@mmc.nl)
- 28
- 29
- 30 36. M.E. Sanson-van Praag, M.D. Ph.D., Department of Internal Medicine, Meander Medical Center,
- 31 Maatweg 3, 3813 TZ, Amersfoort, the Netherlands. [me.sanson@meandermc.nl](mailto:me.sanson@meandermc.nl)
- 32
- 33 37. E.S. van den Akker, M.D. Ph.D., Department of Obstetrics and Gynaecology, OLVG, Oosterpark 9,
- 34 1091 AC, Amsterdam, the Netherlands. [e.s.a.vandenakker@olvg.nl](mailto:e.s.a.vandenakker@olvg.nl)
- 35
- 36 38. C.B. Brouwer, M.D. Ph.D., Department of Internal Medicine, OLVG, Oosterpark 9, 1091 AC,
- 37 Amsterdam, the Netherlands. [c.b.brouwer@olvg.nl](mailto:c.b.brouwer@olvg.nl)
- 38
- 39
- 40 39. B.B. Hermsen, M.D. Ph.D., Department of Obstetrics and Gynaecology, OLVG, Jan Tooropstraat
- 41 164, 1061 AE, Amsterdam, the Netherlands. [b.hermsen@olvg.nl](mailto:b.hermsen@olvg.nl)
- 42
- 43 40. B.J. Potter van Loon, M.D. Ph.D., Department of Internal Medicine, OLVG, Jan Tooropstraat 164,
- 44 1061 AE, Amsterdam, the Netherlands. [b.pottervanloon@olvg.nl](mailto:b.pottervanloon@olvg.nl)
- 45
- 46 41. O.W.H. van der Heijden, M.D. Ph.D., Department of Obstetrics and Gynaecology, Radboud
- 47 University Medical Center, Geert Grooteplein-Zuid 10, 6525 GA, Nijmegen, the Netherlands.
- 48 [Olivier.vanderheijden@radboudumc.nl](mailto:Olivier.vanderheijden@radboudumc.nl)
- 49
- 50 42. B. de Galan, M.D. Ph.D., Department of Internal Medicine, Radboud University Medical Center,
- 51 Geert Grooteplein-Zuid 10, 6525 GA, Nijmegen, the Netherlands.
- 52 [Bastiaan.degalan@radboudumc.nl](mailto:Bastiaan.degalan@radboudumc.nl)
- 53
- 54
- 55
- 56
- 57
- 58
- 59
- 60



- 1  
2  
3  
4  
5  
6  
7  
8  
9  
10  
11  
12  
13  
14  
15  
16  
17  
18  
19  
20  
21  
22  
23  
24  
25  
26  
27  
28  
29  
30  
31  
32  
33  
34  
35  
36  
37  
38  
39  
40  
41  
42  
43  
44  
45  
46  
47  
48  
49  
50  
51  
52  
53  
54  
55  
56  
57  
58  
59  
60
43. M. van Leeuwen, M.D. Ph.D., Department of Obstetrics and Gynaecology, Reinier de Graaf Hospital, Reinier de Graafweg 5, 2625 AD, Delft, the Netherlands. [Marsha.vanleeuwen@rdgg.nl](mailto:Marsha.vanleeuwen@rdgg.nl)
  44. J.A. Wijbenga, M.D. Ph.D., Department of Internal Medicine and Gynaecology, Reinier de Graaf Hospital, Reinier de Graafweg 5, 2625 AD, Delft, the Netherlands. [A.wijbenga@rdgg.nl](mailto:A.wijbenga@rdgg.nl)
  45. K. de Boer, M.D. Ph.D., Department of Obstetrics and Gynaecology, Rijnstate Hospital, Wagnerlaan 55, 6815 AD, Arnhem, the Netherlands. [kdeboer@rijnstate.nl](mailto:kdeboer@rijnstate.nl)
  46. A. C. Van Bon, M.D. Ph.D., Department of Internal Medicine, Rijnstate Hospital, Wagnerlaan 55, 6815 AD, Arnhem, the Netherlands. [acvanbon@rijnstate.nl](mailto:acvanbon@rijnstate.nl)
  47. F.W. van der Made, M.D., Department of Obstetrics and Gynaecology, Franciscus Gasthuis & Vlietland, Kleiweg 500, 3045 PM, Rotterdam, the Netherlands. [f.vandermade@sfg.nl](mailto:f.vandermade@sfg.nl)
  48. S.A. Eskes, M.D. Ph.D., Department of Internal Medicine, Franciscus Gasthuis & Vlietland, Kleiweg 500, 3045 PM, Rotterdam, the Netherlands. [s.eskes@franciscus.nl](mailto:s.eskes@franciscus.nl)
  49. M. Zandstra, M.D., Department of Obstetrics and Gynaecology, Spaarne Gasthuis, Boerhaavelaan 22, 2035 RC, Haarlem, the Netherlands. [mzandstra@spaarnegasthuis.nl](mailto:mzandstra@spaarnegasthuis.nl)
  50. W.H. van Houtum, M.D. Ph.D., Department of Internal Medicine, Spaarne Gasthuis, Boerhaavelaan 22, 2035 RC, Haarlem, the Netherlands. [wvanhoutum@spaarnegasthuis.nl](mailto:wvanhoutum@spaarnegasthuis.nl)
  51. B.A.M. Braams-Lisman, M.D. Ph.D., Department of Obstetrics and Gynaecology, Tergooi, Rijkstraatweg 1, 1261 AN, Blaricum, the Netherlands. [Bbraams-lisman@tergooi.nl](mailto:Bbraams-lisman@tergooi.nl)
  52. C.R.G.M. Daemen-Gubbels, M.D., Department of Internal Medicine, Tergooi, Rijkstraatweg 1, 1261 AN, Blaricum, the Netherlands. [cdaemen@tergooi.nl](mailto:cdaemen@tergooi.nl)
  53. M.G.A.J. Wouters, M.D. Ph.D., Department of Obstetrics and Gynaecology, Amsterdam UMC, VU University Medical Center, de Boelelaan 1117, 1081 HV, Amsterdam, the Netherlands. [mgaj.wouters@vumc.nl](mailto:mgaj.wouters@vumc.nl)
  54. R.G. IJzerman, M.D. Ph.D., Diabetes Center, Department of Internal Medicine, Amsterdam UMC, VU University Medical Center, de Boelelaan 1117, 1081 HB, Amsterdam, the Netherlands. [rg.ijzerman@vumc.nl](mailto:rg.ijzerman@vumc.nl)
  55. N.A. Mensing van Charante, M.D., Department of Obstetrics and Gynaecology, Dijklander Hospital, Maelsonstraat 3, 1624 NP, Hoorn, the Netherlands. [n.a.mensingvancharante@westfriesgasthuis.nl](mailto:n.a.mensingvancharante@westfriesgasthuis.nl)
  56. R. Zwertbroek, M.D., Department of Internal Medicine, Dijklander Hospital, Maelsonstraat 3, 1624 NP, Hoorn, the Netherlands. [r.zwertbroek@westfriesgasthuis.nl](mailto:r.zwertbroek@westfriesgasthuis.nl)
  57. J.E. Bosmans, Ph.D., Department of Health Sciences, Faculty of Science, Vrije Universiteit Amsterdam, Amsterdam Public Health Research Institute, Amsterdam, the Netherlands. De Boelelaan 1081, 1081 BT Amsterdam, the Netherlands. [j.e.bosmans@vu.nl](mailto:j.e.bosmans@vu.nl)

- 1  
2  
3 58. I.M. Evers, M.D. Ph.D., Department of Obstetrics and Gynaecology, Meander Medical Center,  
4 Maatweg 3, 3813 TZ, Amersfoort, the Netherlands. [im.evers@meandermc.nl](mailto:im.evers@meandermc.nl)  
5  
6  
7 59. B.W.J. Mol, M.D. Ph.D., Department of Obstetrics and Gynaecology, Monash University, Monash  
8 Medical Centre 246, Clayton Road Clayton, Victoria 3168, Australia. [ben.mol@monash.edu](mailto:ben.mol@monash.edu)  
9  
10 60. H.W. de Valk, M.D. Ph.D., Department of Internal Medicine and Endocrinology, University Medical  
11 Center Utrecht, Utrecht University, Lundlaan 6, 3508 AB, Utrecht, the Netherlands.  
12 [h.w.devalk@umcutrecht.nl](mailto:h.w.devalk@umcutrecht.nl)  
13  
14 61. F. Groenendaal, M.D. Ph.D., Department of Neonatology, University Medical Center Utrecht,  
15 Utrecht University, Lundlaan 6, 3508 AB, Utrecht, the Netherlands. [f.groenendaal@umcutrecht.nl](mailto:f.groenendaal@umcutrecht.nl)  
16  
17 62. C.A. Naaktgeboren, Ph.D., Julius Center for Health Sciences and Primary Care, University Medical  
18 Center Utrecht, Utrecht University, Heidelberglaan 100, 3584 CX, Utrecht, the Netherlands.  
19 [c.naaktgeboren@umcutrecht.nl](mailto:c.naaktgeboren@umcutrecht.nl)  
20  
21 63. R.C. Painter, M.D. Ph.D., Department of Obstetrics and Gynaecology, Amsterdam University  
22 Medical Centers, University of Amsterdam, Meibergdreef 9, 1105 AZ, Amsterdam, the  
23 Netherlands. [r.c.painter@amc.uva.nl](mailto:r.c.painter@amc.uva.nl)  
24  
25 64. J.H. DeVries, M.D. Ph.D., Department of Internal Medicine and Endocrinology, Amsterdam  
26 University Medical Centers, University of Amsterdam, Meibergdreef 9, 1105 AZ, Amsterdam, the  
27 Netherlands. [j.h.devries@amc.uva.nl](mailto:j.h.devries@amc.uva.nl)  
28  
29 65. A. Franx, M.D., Ph.D., Department of Obstetrics and Gynaecology, University Medical Center  
30 Utrecht, Utrecht University, Lundlaan 6, 3508 AB, Utrecht, the Netherlands. [a.franx-  
31 2@umcutrecht.nl](mailto:a.franx-2@umcutrecht.nl)  
32  
33 66. B.B. van Rijn, M.D. Ph.D., Department of Obstetrics and Gynaecology, University Medical Center  
34 Utrecht, Utrecht University, Lundlaan 6, 3508 AB, Utrecht, the Netherlands. Department of  
35 Obstetrics and Prenatal Medicine, Erasmus MC University Medical Center Rotterdam, Doctor  
36 Molewaterplein 40, 3015 GD, Rotterdam, the Netherlands. [b.vanrijn@erasmusmc.nl](mailto:b.vanrijn@erasmusmc.nl)  
37  
38  
39  
40  
41  
42

**Corresponding author**

43 B.B. van Rijn, M.D., Ph.D.  
44 Department of Obstetrics & Prenatal Medicine  
45 Erasmus MC University Medical Center Rotterdam  
46 Doctor Molewaterplein 40  
47 3015 GD, Rotterdam, the Netherlands  
48 [b.vanrijn@erasmusmc.nl](mailto:b.vanrijn@erasmusmc.nl)  
49  
50  
51  
52

53 **Word count:** 4301 (excluding title page, summary, abstract and references)  
54  
55  
56  
57  
58  
59  
60

## ABSTRACT

**Introduction:** In women with gestational diabetes mellitus (GDM) requiring pharmacotherapy, insulin was the established first-line treatment. More recently oral glucose lowering drugs (OGLDs) have gained popularity as a patient-friendly, less expensive, and safe alternative. Monotherapy with metformin or glibenclamide (glyburide) is incorporated in several international guidelines. In women who do not reach sufficient glucose control with OGLD monotherapy, usually insulin is added, either with or without continuation of OGLDs. No reliable data from clinical trials, however, is available on the effectiveness of a treatment strategy using all three agents: metformin, glibenclamide, and insulin, in a stepwise approach, compared with insulin-only therapy for improving pregnancy outcomes. In this trial we aim to assess the clinical effectiveness, cost-effectiveness and patient experience of a stepwise combined OGLD treatment protocol, compared to conventional insulin-based therapy for GDM.

**Methods:** The SUGAR-DIP trial is an open label, multicenter randomized controlled non-inferiority trial. Participants are women with GDM who do not reach target glycemic control with modification of diet, between 16-34 weeks of gestation. Participants will be randomized to either treatment with OGLDs, starting with metformin and supplemented as needed with glibenclamide, or randomized to treatment with insulin. In women who do not reach target glycemic control with combined metformin and glibenclamide, glibenclamide will be substituted with insulin, while continuing metformin. The primary outcome will be the incidence of large-for-gestational-age infants (birth weight >90<sup>th</sup> percentile). Secondary outcome measures are maternal diabetes-related endpoints, obstetric complications, neonatal complications and cost-effectiveness analysis. Outcomes will be analyzed according to the intention-to-treat principle.

**Ethics and dissemination:** The study protocol was approved by the Ethics Committee of the Utrecht University Medical Center. Approval by the boards of management for all participating hospitals will be obtained. Trial results will be submitted for publication in peer-reviewed journals.

**Trial registration:** Netherlands Trial Registry NTR6134 (November 2016).

**Keywords:** gestational diabetes mellitus, oral glucose lowering drugs, antihyperglycemic agents, antidiabetic medication, metformin, glyburide, glibenclamide, insulin, randomized controlled trial, large-for-gestational-age.

1  
2  
3 **Article summary:**  
4  
5  
6

7  
8 **Strengths and limitations of this study**  
9

- 10 - This is the first open-label randomized controlled trial that directly compares a step-wise  
11 treatment protocol using a combination of oral glucose lowering drugs (OGLDs) to  
12 insulin as a first-line treatment for GDM not responding to diet  
13  
14 - The randomized multi-center design minimizes the risk of bias and increases  
15 generalizability of the results  
16  
17 - Variation in diagnostic thresholds and treatment targets for GDM may need to be  
18 addressed to assess the value of this strategy across different populations  
19  
20  
21  
22  
23  
24  
25  
26  
27  
28  
29  
30  
31  
32  
33  
34  
35  
36  
37  
38  
39  
40  
41  
42  
43  
44  
45  
46  
47  
48  
49  
50  
51  
52  
53  
54  
55  
56  
57  
58  
59  
60

## INTRODUCTION:

The prevalence of gestational diabetes mellitus (GDM) is rising and currently affects approximately 1-28% of all pregnancies, varying by region and diagnostic criteria used.[1–4] GDM carries significant perinatal risks for pregnancy and childbirth, such as polyhydramnios, small- and large-for-gestational-age infants, macrosomia, stillbirth, shoulder dystocia, obstructed labor, preeclampsia and neonatal hypoglycemia.[5–9] In addition, increasing concern exists about the impact of GDM on offspring development and associated long-term risks for glucose and insulin resistance, obesity and chronic disease in children born to mothers with GDM.[10–12]

The rising number of women diagnosed with GDM is increasingly putting pressure on health care resources. Effective treatment for GDM requires a multidisciplinary approach by midwives, obstetricians, dietitians, endocrinologists, and diabetes nurse specialists. Current treatment of GDM focuses on achieving optimal glycemic control. When blood glucose levels, usually based on self-monitoring, fall outside the target range despite lifestyle- and dietary advice, treatment with antihyperglycemic medication is indicated.[13,14] As pharmacologic treatment subcutaneous insulin injections have traditionally been used as first-choice treatment for GDM and is still advocated in many [15–18], but not all guidelines [19–21]. In recent years, clinical research and experience with oral glucose lowering drugs (OGLDs) has shown promising results as a treatment alternative that may substitute insulin in many women.[22,23]

Metformin and glibenclamide (glyburide) are the OGLDs most studied for diabetes in pregnancy. Both are already widely used in the treatment of GDM, considered to be safe and have been incorporated in several guidelines as treatment options alongside insulin.[19–21,24,25] A 2014 retrospective cohort study from the United States showed that the use of glibenclamide had increased from 7.4% in 2000 to 64.5% in 2011, becoming the most common treatment for GDM requiring pharmacotherapy in 2007.[26] In the United Kingdom, incorporated in the NICE guidelines (National Institute for Health and Care Excellence, UK),

1  
2  
3 metformin is the first choice treatment, supplemented with insulin if needed.[19] Insulin is  
4 offered to women if metformin is contraindicated or unacceptable to the patient, or target  
5 glucose values are not met with metformin only. The NICE guidelines state that glibenclamide  
6 could be considered an option for women in whom blood glucose targets are not achieved with  
7 metformin, but decline insulin therapy, or for those who cannot tolerate metformin. The  
8 International Federation of Gynecology and Obstetrics (FIGO) and more recently the Society of  
9 Maternal-Fetal Medicine (SMFM) Committee further endorsed OGLDs as a reasonable and safe  
10 first-line pharmacologic treatment option in GDM, with metformin being preferred over  
11 glibenclamide.[21,25] In contrast, in the Netherlands, insulin has remained the drug of choice in  
12 the majority of hospitals.  
13  
14  
15  
16  
17  
18  
19  
20  
21  
22

23 Two 2017 Cochrane Reviews on 11 and 53 studies (1487, and 7381 women) concluded that due  
24 to insufficient high-quality evidence no single agent is superior in the treatment of GDM.[27,28]  
25 And although the use of OGLDs is widespread, there is an ongoing discussion on which drug  
26 should be first line treatment after lifestyle- and dietary interventions.[24] Both insulin and oral  
27 agents have advantages and disadvantages. Insulin is safe and effective, however is considered  
28 burdensome by pregnant women, requires intensive glucose monitoring, and is associated with  
29 episodes of maternal hypoglycemia.[29] OGLDs are less costly, less burdensome and associated  
30 with higher patient satisfaction.[23,30–33] Metformin has the advantage over insulin that  
31 hypoglycemic events do not occur, but it is less potent when compared to glibenclamide, can  
32 cause gastro-intestinal side-effects and is possibly associated with more spontaneous preterm  
33 deliveries.[34] Glibenclamide, similar to insulin, is more potent in its glucose-lowering effect and  
34 may cause hypoglycemia in the mother and newborn.[22,35] Other undesirable effects include  
35 gastro-intestinal reactions, allergic skin reactions, altered liver enzyme values, visual  
36 disturbances and weight gain. And although intrauterine exposure to metformin or  
37 glibenclamide is not associated with congenital anomalies, much less is known about direct fetal  
38 metabolic effects and long-term effects on mothers and offspring.[36]  
39  
40  
41  
42  
43  
44  
45  
46  
47  
48  
49  
50  
51  
52  
53  
54  
55  
56  
57  
58  
59  
60

1  
2  
3 With current OGLD monotherapy, consisting of either metformin or glibenclamide, in women  
4 who do not reach glycemic control, prompting the need for additional measures, in general  
5 OGLDs are replaced by or supplemented with insulin. A combination of oral agents may be an  
6 interesting strategy for GDM treatment, however current evidence is insufficient to determine  
7 the optimal use of OGLDs. In a recent randomized controlled trial by Nachum *et al.* in 104  
8 women with GDM, powered for glycemic control, combination therapy of metformin and  
9 glibenclamide decreased the need for additional insulin from 32% to 11% ( $p = 0.0002$ )  
10 compared to monotherapy.[37] Metformin as the first-line therapy combined with glibenclamide  
11 if needed was associated with the highest treatment success. These data support the need for a  
12 well-powered large scale randomized controlled trial to compare a step-wise approach  
13 combining metformin and glibenclamide to conventional insulin therapy to study effects on  
14 pregnancy outcomes.  
15  
16  
17  
18  
19  
20  
21  
22  
23  
24  
25  
26

27 In the SUGAR-DIP trial, a multicenter randomized controlled trial, we aim to assess non-  
28 inferiority of treatment with metformin, and in case of insufficient glycemic control the addition  
29 of glibenclamide, compared to immediate insulin in the treatment of GDM. We expect that a  
30 proportion of patients will achieve glycemic control with metformin only. By adding  
31 glibenclamide in combined treatment with metformin, we expect to achieve glycemic control as  
32 good as by insulin, while maintaining the benefits and ease of a less burdensome treatment with  
33 oral medication. We will assess the clinical effectiveness, cost-effectiveness and patient  
34 experience of stepwise oral antihyperglycemic medication to treat GDM compared to  
35 conventional insulin-based treatment strategy.  
36  
37  
38  
39  
40  
41  
42  
43  
44

## 45 **METHODS:**

### 46 **Design and setting:**

47  
48  
49 The SUGAR-DIP trial is a multicenter non-inferiority randomized controlled trial (RCT). The study  
50 will be open label as oral drugs and insulin cannot be administered individually in a blinded way.  
51 The study will be conducted within the setting of the Dutch Consortium for Healthcare  
52  
53  
54  
55  
56  
57  
58  
59  
60

1  
2  
3 Evaluation and Research in Obstetrics and Gynaecology – NVOG Consortium 2.0,[38] a  
4 collaborative network of all major hospitals in the Netherlands and the Dutch Society of  
5 Obstetrics and Gynaecology (NVOG) and performed by treatment teams generally consisting of  
6 an internist, a gynaecologist and diabetes nurses. The trial was approved by the Medical  
7 Research Ethics Committee (MREC) of the UMC Utrecht. Trial reference number: 16-523/M. The  
8 trial is registered in the Netherlands Trial Registry on 29 November 2016 under the number  
9 NTR6134.[39]  
10  
11  
12  
13  
14  
15

### 16 17 18 **Patient and public involvement:**

19 In the preparation of the trial, the patient organisation Dutch Diabetes Association (Diabetes  
20 Vereniging Nederland) was involved. A questionnaire on patient perspectives of women who  
21 have (had) GDM was issued by the organization prior to the development of the study protocol.  
22 The organization was furthermore involved in reviewing the study protocol and provided  
23 valuable input in the development of the information material used in the study. Upon  
24 completion of the trial the patient organisation will be involved in dissemination of the study  
25 results.  
26  
27  
28  
29  
30  
31  
32  
33

### 34 35 **Participants and eligibility criteria:**

36 Women diagnosed with GDM who have not reached target glycemic control with dietary and  
37 lifestyle adaptations and thus meet the criteria for additional treatment with antihyperglycemic  
38 medication between 16 to 34 weeks of gestation, will be eligible for inclusion. Target glycemic  
39 control is defined by the NVOG (Dutch College O&G) diabetes in pregnancy guideline as a  
40 fasting glucose concentration  $\leq 5.3$  mmol/L, 1-hour postprandial  $\leq 7.8$  mmol/L or 2-hour  
41 postprandial  $\leq 6.7$  mmol/L.[18]  
42  
43  
44  
45  
46  
47  
48

49 The diagnosis of GDM is made according to Dutch national guidelines, using a 75-gram oral  
50 glucose tolerance test.[18] Due to a transition in diagnostic thresholds, both the WHO 1999  
51 (fasting  $\geq 7.0$  mmol/L or 2-hour postload  $\geq 7.8$  mmol/L) and WHO 2013 criteria (fasting  $\geq 5.1$   
52 mmol/L, 1-hour postload  $\geq 10.0$  or 2-hour postload  $\geq 8.5$  mmol/L) for venous plasma glucose  
53  
54  
55  
56  
57  
58  
59  
60



1  
2  
3 values were used to diagnose GDM. The 100-gram OGTT is incorporated in the study protocol,  
4 as it is part of the Dutch national guideline, however this test is not commonly used in the  
5 Netherlands. Although thresholds for the diagnosis of GDM in the Netherlands and therefore in  
6 the trial are divergent to some extent, the target glucose values to define insufficient glycemic  
7 control (while on diet) as the additional inclusion criterium for enrolment in the trial apply to all  
8 centers. It is thus expected that patients eligible for enrolment form a homogenous group  
9 despite differences in screening tools.  
10  
11  
12  
13  
14  
15

16  
17  
18 Screening in the Netherlands is conducted according to a high risk strategy, and takes place in  
19 the second trimester (24-28 weeks) among pregnant women with one or more of the following  
20 risk factors: a history of GDM, BMI > 30 (kg/m<sup>2</sup>), a history of a neonate with a birth weight >95<sup>th</sup>  
21 percentile or >4500 grams, a first degree family member with diabetes, polycystic ovary  
22 syndrome, a history of an unexplained intra-uterine death or an ethnicity with higher diabetes  
23 risk (e.g. women from South-Asia, Indian descent / Surinamese, Afro-Caribbean, Middle-Eastern,  
24 Moroccan or Egyptian ethnicity). In case of a history of GDM in a previous pregnancy an OGTT  
25 as early as 16 weeks of gestation is recommended, to be repeated at 24-28 weeks if normal. An  
26 OGTT may furthermore be performed in case of suspected fetal macrosomia, polyhydramnios,  
27 or symptoms of polydipsia or polyuria, also in women without risk factors.  
28  
29  
30  
31  
32  
33  
34  
35  
36  
37

38 For the SUGAR-DIP trial we have set the upper limit for inclusion to 34 weeks, in line with  
39 previous trials [22,23,40], allowing for at least 4 weeks of exposure to pharmacological  
40 treatment. With the timing of the OGTT in current guidelines it is expected that the majority of  
41 women will be treated for over 8 weeks. Although in women diagnosed later in pregnancy  
42 exposure to treatment may have less of an effect on the primary outcome, treatment may still  
43 influence several important secondary outcomes, such as neonatal hypoglycemia.  
44  
45  
46  
47  
48  
49

50  
51 Additional inclusion criteria for the SUGAR-DIP trial are: (1) maternal age  $\geq$ 18 years (2) singleton  
52 pregnancy (3) ability to understand the Dutch or English language and (4) ability to provide  
53 written informed consent. Patients who meet any of the following criteria are excluded from the  
54  
55  
56  
57

1  
2  
3 study: (1) known pre-existing type 1 or type 2 diabetes mellitus (2) severe medical or psychiatric  
4 comorbidities (3) significant liver disease or renal insufficiency, or any other known condition  
5 with contraindications for the use of either metformin or glibenclamide (4) pregnancy with a  
6 fetus affected by major congenital birth defects and/or chromosomal abnormality.  
7  
8  
9

### 10 11 12 **Recruitment and randomisation:**

13  
14 Eligible women will be informed and invited to participate by either their diabetes care or  
15 obstetric care provider, i.e. physician, obstetrician, midwife, or diabetes nurse. Following  
16 counselling, written informed consent is obtained and participants are individually randomized  
17 to either stepwise OGLDs or insulin. Randomization is performed through a central web-based  
18 tool (Castor EDC, Ciwit B.V., the Netherlands and Castor Research Inc, USA), using a 1:1 ratio and  
19 block randomization with a variable block size of 4 and 6.  
20  
21  
22  
23  
24  
25

### 26 27 **Intervention and control:**

28  
29 The stepwise treatment strategy for the intervention (OLGD) and control (insulin) group is  
30 displayed in Figure 1.  
31  
32  
33

#### 34 *Oral glucose lowering drugs (OGLDs):*

35  
36 In women allocated to the OGLD strategy, metformin is initiated with a starting dose of 500 mg  
37 once daily for 3 days, followed by an increase of 500 mg every 3 days to the final daily dose of  
38 2000 mg divided into 2 doses. In case of serious side effects (e.g. severe nausea, persistent  
39 vomiting or diarrhoea), the metformin dose can be lowered to the maximum dose tolerated with  
40 acceptable side effects. Participants are advised to take metformin during or shortly after a meal  
41 to reduce side effects. In case of insufficient glycaemic control with metformin at the maximum  
42 (tolerated) dose, glibenclamide will be added at a starting dose of 2.5 mg once daily.  
43  
44  
45  
46  
47  
48

49 Glibenclamide can be increased if glycaemic goals are not met with increments of 2.5 mg every  
50 week, up to a maximum dose of 15 mg daily. In case of insufficient glycaemic control with both  
51 metformin and glibenclamide at the maximum doses, glibenclamide will be discontinued and  
52 replaced by insulin, while metformin will be continued.  
53  
54  
55  
56  
57  
58  
59  
60

1  
2  
3  
4  
5 *Insulin:*

6  
7 Participants randomized to insulin treatment will receive insulin according to usual practice, i.e.  
8 in incremental doses until glycemic targets are met.[41] This includes both short- and long-  
9 acting insulin.  
10  
11  
12

13  
14 **Study procedures:**

15  
16  
17 *Diabetes care:*

18  
19 In all participants, a specialized diabetes nurse or internal medicine specialist will review  
20 glycemic control every 1-2 weeks using the following target values for glucose, as measured by  
21 capillary glucose self-testing: fasting  $\leq 5.3$  mmol/L, 1 hour postprandial  $\leq 7.8$  mmol/L and 2  
22 hours postprandial  $\leq 6.7$  mmol/L. If titration of medication requires more frequent feedback,  
23 participants will be given the option to contact their diabetes treatment specialist in between  
24 scheduled visits. All participants receive the usual instructions regarding hypoglycemic events  
25 (glucose  $<4.0$  mmol/L). A participant diary is used to document glucose values and medication  
26 use, and is reviewed at every visit. Frequency of self-monitoring will be discussed on an  
27 individual basis with the treating diabetes team. Weight is documented at study inclusion and at  
28 every subsequent visit. Blood sampling for glycated haemoglobin (HbA1c) is performed at study  
29 inclusion, at 30 weeks and at 36 weeks of pregnancy.  
30  
31  
32  
33  
34  
35  
36  
37  
38  
39  
40

41 *Obstetric care:*

42  
43 All participants will receive obstetrical care based on usual practice for gestational diabetes  
44 mellitus requiring pharmacological therapy. This includes assessment of fetal biometry at weeks  
45 26-28, 30-32 and 34-36 of pregnancy by measuring fetal abdominal circumference (AC), femur  
46 length (FL), head circumference (HC), estimated fetal weight (EFW) (Hadlock or similar) and  
47 amniotic fluid volume. The timing of delivery follows local protocol, based on national  
48 guidelines.[18] Induction of labour around 38-39 weeks of gestation is generally recommended  
49 for women with GDM requiring medication. Both oral antihyperglycemic agents and insulin may  
50  
51  
52  
53  
54  
55  
56  
57  
58  
59  
60

1  
2  
3 be discontinued on the day of delivery in case of induced labor or as soon as labor is established  
4 after spontaneous onset. Monitoring of glucose levels during labor is advised.  
5  
6  
7

8  
9 *Neonatal care:*

10 Neonatal glucose monitoring will be performed serially for up to 12-24 hours after delivery in  
11 accordance to local protocol in participating sites. We defined neonatal hypoglycemia as a  
12 plasma glucose concentration  $<2.6$  mmol/L and severe neonatal hypoglycemia as  $<2.0$   
13 mmol/L.[42] Time and plasma glucose values are documented as well interventions used to  
14 regulate neonatal glucoses. Furthermore, any admission to a neonatal Medium Care or Intensive  
15 Care Unit is documented.  
16  
17  
18  
19  
20  
21  
22

23  
24 *Postpartum:*

25 Participants will attend routine obstetric and diabetes care provider appointments around 5-6  
26 weeks postpartum at which time glucose self-monitoring will be carried out to detect persistent  
27 postpartum hyperglycemia.  
28  
29  
30  
31

32  
33 **Outcome measures**

34  
35 *Primary outcome measure:*

36 The primary outcome is a large-for-gestational-age (LGA) infant. Large-for-gestational-age is  
37 defined as a birth weight  $\geq 90^{\text{th}}$  percentile, using the Dutch Perinatal Registry (PRN) reference  
38 charts.[43]  
39  
40  
41  
42

43  
44 *Secondary outcome measures*

45 Secondary outcomes include maternal hypoglycemia (biochemical hypoglycemia  $<3.9$  mmol/L,  
46 symptomatic hypoglycemia, severe hypoglycemia prompting the need for help by another  
47 person and/or hospital admission for hypoglycemia), elective- and emergency Caesarean  
48 section, pregnancy related hypertensive disorders including Pregnancy Induced Hypertension  
49 (PIH) and preeclampsia (PE), preterm delivery (delivery  $<37$  weeks of gestation), postpartum  
50 neonatal hypoglycemia (moderate: serum glucose  $<2.6$  mmol/L, severe: serum glucose  $<2.0$   
51  
52  
53  
54  
55  
56  
57  
58  
59  
60

1  
2  
3 mmol/L), neonatal hyperbilirubinemia requiring phototherapy, neonatal Medium Care or  
4 Intensive Care admission and a cost-effectiveness analysis. These secondary outcomes were  
5 selected based on their clinical relevance and/or observed differences in previous studies  
6 comparing OGLDs and insulin.  
7  
8  
9

10  
11  
12 Furthermore, a number of maternal baseline characteristics, additional obstetric- and neonatal  
13 outcomes, diabetes-related endpoints, biomarkers and laboratory examinations will be assessed  
14 (*see supplement 1 and 2*).  
15  
16  
17

### 18 19 20 **Follow-up**

21 Details regarding outcomes, including maternal and neonatal hospital admissions or  
22 complications are recorded up to 6 weeks postpartum. Long-term follow-up of mother and child  
23 is not part of the initial trial, however participants will be informed about planned long-term  
24 follow-up and asked to provide additional personal information and contact details on the  
25 patient information and informed consent form at study inclusion.  
26  
27  
28  
29  
30

### 31 32 33 **Patient perspective and treatment satisfaction:**

34 Side effects will be monitored using a custom made form consisting of a short list of the most  
35 common side effects and the possibility to self-report any other experienced undesirable effects.  
36 The form will also address the actions taken as a response to side effects. Both treatment arms  
37 receive the same side effect form. Furthermore, treatment satisfaction is measured around 36  
38 weeks of pregnancy using the Diabetes Treatment Satisfaction Questionnaire (DTSQ), consisting  
39 of 8 questions regarding diabetes treatment and patient experience.[44,45] Two additional  
40 questions regarding the impact of side effects and discomfort were provided by the copyright  
41 holder from a related treatment satisfaction measures for another condition, and added as items  
42 9 and 10 of the DTSQ, to be analysed separately.[46]  
43  
44  
45  
46  
47  
48  
49  
50

### 51 52 **Safety and monitoring:**

53 An independent Data and Safety Monitoring Board (DSMB) will be established to safeguard the  
54 interests of trial participants, assess the safety and efficacy of the interventions during the trial  
55  
56  
57

1  
2  
3 period and monitor the overall conduct of the clinical trial. An interim safety review is planned at  
4 300 included participants and will be carried out by an independent statistician.  
5

6  
7 All serious adverse events (SAE) reported by the subject or observed by the investigator or staff  
8 will be recorded. SAE definitions and standards for expedited reporting follow the ICH GCP  
9 guidelines on safety reporting.[47] All SAEs will be reported to the accredited ethics committee  
10 that approved the protocol, according to the requirements of that committee.  
11  
12  
13  
14  
15

### 16 **Sample size:**

17  
18 The primary outcome measure, rate of LGA infants, is anticipated to occur in 20% of patients in  
19 both study groups, based on a Dutch study cohort.[48] We have set the non-inferiority limit at  
20 8%, which is equivalent to excluding a relative risk in the OGLD treatment compared with  
21 conventional insulin-based therapy greater than 1.4. With a one-sided significance level ( $\alpha$ ) of  
22 0.025 and a power of 0.8, the sample size is calculated at 393 patients in each arm. Accounting  
23 for a loss to follow-up of 3%, 810 patients are needed (405 per arm).  
24  
25  
26  
27  
28  
29

### 30 **Analyses and reporting of results:**

#### 31 *Primary and secondary outcomes:*

32  
33 Primary analysis of the RCT results will be according to the intention-to-treat principle. Missing  
34 data will be handled according to the complete-case analysis principle, based on the availability  
35 of the components needed to determine the primary endpoint. Results will be reported  
36 according to CONSORT guidelines, using the extension for non-inferiority trials. In case of  
37 substantial cross-over (>5%), a per protocol analysis is used additionally to the intention-to-  
38 treat analysis. Cross-over is defined as patients not receiving the treatment allocated by  
39 randomization (e.g. participant never started treatment, treatment is no longer necessary for  
40 instance due to improved dietary adaptations, side-effects, or stopping treatment shortly after  
41 randomization).  
42  
43  
44  
45  
46  
47  
48  
49  
50

51  
52 For the primary analysis, the non-inferiority of metformin/glibenclamide versus insulin for  
53 preventing large-for-gestational-age infants will be established when the upper bounds of the  
54  
55  
56  
57  
58  
59  
60

1  
2  
3 two-sided 95% confidence interval for the risk ratio is less than 1.4. Large-for-gestational-age  
4 will be defined as birth weight >90<sup>th</sup> percentile.[43] Results for the primary outcome will also be  
5 presented as absolute and relative risks (along with 95% confidence intervals (CI)) and numbers  
6 needed to treat (if applicable). Analyses will not be adjusted for any observed differences in  
7 baseline characteristics between the arms.  
8  
9  
10  
11  
12

13  
14 The secondary outcome measures will be analysed similar to the primary outcome measure.  
15 Categorical secondary outcomes will be assessed by comparing the event rates in the two  
16 groups using a chi-square test with a p-value of 0.05 and also by presenting absolute and  
17 relative risks. For continuous secondary outcomes, differences between groups will be assessed  
18 with the student's t-test if the outcome is normally distributed and with a non-parametric Mann-  
19 Whitney U test if skewed. These outcomes will be presented per group as means with standard  
20 deviation, geometric means with 95% CI, or as median with interquartile range, depending on  
21 distribution.  
22  
23  
24  
25  
26  
27  
28  
29

### 30 *Subgroup analyses:*

31 Subgroup analyses will be performed for women with and without a history of GDM, a family  
32 history of diabetes mellitus (first and/or second degree relative), BMI (normal weight,  
33 overweight, obese), according to severity of GDM (fasting and 2 hour OGTT glucose value by  
34 various diagnostic criteria and cut-offs), sex (neonate). Additionally, potential causes for  
35 treatment failure of metformin alone will also be explored. Within the patients receiving oral  
36 agents, the outcome rate will be compared between the patients whose blood glucose could be  
37 regulated by metformin alone and those patients who also required glibenclamide and even  
38 additional insulin. Patient characteristics between these groups will be compared to identify  
39 possible contributing factors to metformin treatment failure.  
40  
41  
42  
43  
44  
45  
46  
47  
48  
49

### 50 *Economic evaluation:*

51 An economic evaluation will be conducted alongside the randomized controlled trial according  
52 to guidelines issued by the National Health Care Institute.[49] The EuroQuol questionnaire (EQ-  
53  
54  
55  
56  
57  
58  
59  
60

1  
2  
3 5D-5L) for health status measures is used at time of study inclusion, 36 weeks of pregnancy and  
4 4-6 weeks postpartum.[50] Further Health Technology Assessment questionnaires are based on  
5 the iMTA PCQ (Productivity Cost Questionnaire) and MCQ (Medical Consumption  
6 Questionnaire), issued at 36 weeks of pregnancy and 4-6 weeks postpartum.[51,52] The  
7 statistical analysis for the economic evaluation will be done according to the intention-to-treat  
8 principle. Missing data will be imputed using multiple imputation. If OGLDs are non-inferior to  
9 insulin as hypothesized, a cost minimization analysis will be performed to investigate which  
10 intervention is associated with lower costs. If non-inferiority cannot be shown, a cost-  
11 effectiveness analysis will be performed. The costs will be analyzed from both a societal (i.e.  
12 healthcare costs, patient and family costs, and costs in other sectors) and healthcare perspective  
13 (i.e. only healthcare costs). In the cost minimization analysis the differences in costs between  
14 OGLDs and insulin will be evaluated using linear multilevel regression models with adjustment  
15 for covariates and effect modifiers if necessary. Bootstrapping with stratification for center will  
16 be done to estimate 95% confidence intervals around differences in costs. In the cost-  
17 effectiveness analysis cost and effect differences will be estimated using seemingly unrelated  
18 regression analyses while adjusting for confounders and effect modifiers if necessary.  
19 Incremental cost-effectiveness ratios (ICERs) will be calculated by dividing the difference in mean  
20 total costs between the treatment groups by the difference in mean effects. Bootstrapping with  
21 stratification for center will be used to estimate uncertainty surrounding the ICERs. Uncertainty  
22 surrounding the ICERs will be graphically presented on cost-effectiveness planes. Cost-  
23 effectiveness acceptability curves showing the probability that the intervention is cost-effective  
24 in comparison with usual care for a range of different ceiling ratios will also be estimated.[53] A  
25 sensitivity analysis will be performed to investigate the robustness of the results to variation in  
26 the most influential cost parameters such as medication and time required for clinical consults.  
27  
28  
29  
30  
31  
32  
33  
34  
35  
36  
37  
38  
39  
40  
41  
42  
43  
44  
45  
46  
47  
48

#### 49 **Data handling:**

50 Baseline data including patient demographics, obstetric and medical history, details regarding  
51 the pregnancy, delivery outcomes and diabetes treatment will be recorded using a web-based  
52 electronic case record form (eCRF) using Castor EDC. The eCRF is based on a standardized  
53  
54  
55  
56  
57  
58  
59  
60



1  
2  
3 piloted eCRF that has been used in other multicenter trials within the NVOG Consortium 2.0  
4 network and will be filled in by trained research nurses. The full eCRF is provided as a  
5 supplemental file (*Supplement 2*). A study monitor will periodically visit participating centres,  
6 assessing quality of data and auditing trial conduct. Patient privacy will be ensured by allocation  
7 of unique participant numbers, which will be used on all study documentation. The participant  
8 code is only available to the local investigator and research staff.  
9  
10  
11  
12  
13  
14  
15

### 16 **Ethics and dissemination**

17  
18 This trial has been approved by the Medical Research Ethics Committee (MREC) of the UMC  
19 Utrecht. Trial reference number: 16-523/G-M-X. The MREC of the UMC Utrecht is accredited by  
20 the Central Committee on Research Involving Human Subjects (CCMO) since November 1999.  
21 For all participating hospitals and study sites approval by the boards of management will be  
22 obtained. The CCMO has issued a 'No grounds for non-acceptance' for the SUGAR-DIP trial.  
23 Research with a medicinal product must undergo an extra, marginal review alongside the review  
24 by the reviewing party (MREC). The competent authority (CCMO) checks if there are 'motivated  
25 objections' against the study. For this the European adverse reactions database (EudraVigilance)  
26 is checked for any previously reported suspected adverse reactions to the medicinal product,  
27 which could lead to unacceptable risks to the participating research subject. Furthermore, the  
28 CCMO is responsible as the competent authority for entering data into the European EudraCT  
29 database. EudraCT number for this trial: 2016-001401-16.  
30 Changes to the study protocol are documented in amendments. Amendments are submitted for  
31 approval to the MREC. Major changes will be updated on the trial registration website.[39] The  
32 full study protocol, including amendments, is publically available on the study website.[54]  
33 After completion of the trial the principal investigator will report on the results of the main study  
34 and submit a manuscript to a peer-reviewed medical journal. Supplementary analyses will be  
35 reported separately.  
36  
37  
38  
39  
40  
41  
42  
43  
44  
45  
46  
47  
48  
49  
50  
51

### 52 **Data availability statement:**

The datasets used and/or analyzed during the current study will be made available from the corresponding author on reasonable request.

**Author contributions:**

Study concept, trial design and study protocol: LW, DNV, JEB, IME, BWM, HWV, FG, CAN, RCP, JHD, AF, BBR

Acquisition of data: LW, DR, BMCA, RMKK, RCP, MRS, MALVD, FA, DHS, MARV, SMIK, MMO, JJZ, MJMD, TEV, PRJG, SG, WV, NH, TKK, RL, RH, AJMH, TB, CAM, AWB, WH, SV, AGVV, RCD, HJJ, MS, EJPK, JOEHL, PWP, IME, MESP, ESA, CBB, BBH, BJP, OWHH, BG, ML, JAW, KB, ACB, FWM, SAE, MZ, WHH, BAMBL, CRGMDG, MGAJW, RGIJ, NAMC, RZ

Analysis and interpretation of data: LW, DR, DNV, JEB, IME, BWM, HWV, FG, CAN, RCP, JHD, AF, BBR

Drafting of the manuscript: LW, DR, CAN, RCP, JHD, AF, BBR

Critical revision of the manuscript for important intellectual content: LW, DR, DNV, JEB, IME, BWM, HWV, FG, CAN, RCP, JHD, AF, BBR, BMCA, RMKK, MRS, MALVD, FA, DHS, MARV, SMIK, MMO, JJZ, MJMD, TEV, PRJG, SG, WV, NH, TKK, RL, RH, AJMH, TB, CAM, AWB, WH, SV, AGVV, RCD, HJJ, MS, EJPK, JOEHL, PWP, MESP, ESA, CBB, BBH, BJP, OWHH, BG, ML, JAW, KB, ACB, FWM, SAE, MZ, WHH, BAMBL, CRGMDG, MGAJW, RGIJ, NAMC, RZ

Study supervision: JHD, AF, BBR

**Trial Sponsor:**

Institution: University Medical Center Utrecht, Wilhelmina Children's Hospital

Principal investigator: Prof. Dr. A. Franx

Address: Lundlaan 6, 3584 EA, Utrecht, the Netherlands

**Funding:**

The SUGAR-DIP trial and this work is investigator-driven and was supported by ZonMw (The Netherlands Organisation for Health Research and Development, the Hague), grant 80-83600-98-40001

**Competing interests:**

JHD sits on advisory boards for Novo Nordisk A/S

BWM is supported by a NHMRC Practitioner Fellowship (GNT1082548)

BWM reports consultancy for ObsEva, Merck KGaA and Guerbet

## References

- 1 Jiwani A, Marseille E, Lohse N, *et al*. Gestational diabetes mellitus: results from a survey of country prevalence and practices. *J Matern Fetal Neonatal Med* 2012;**25**:600–10. doi:10.3109/14767058.2011.587921
- 2 Guariguata L, Linnenkamp U, Beagley J, *et al*. Global estimates of the prevalence of hyperglycaemia in pregnancy. *Diabetes Res Clin Pract* 2014;**103**:176–85. doi:10.1016/j.diabres.2013.11.003
- 3 Zhu Y, Zhang C. Prevalence of Gestational Diabetes and Risk of Progression to Type 2 Diabetes: a Global Perspective. *Curr Diab Rep* 2016;**16**:7. doi:10.1007/s11892-015-0699-x
- 4 Buckley BS, Harreiter J, Damm P, *et al*. Gestational diabetes mellitus in Europe: prevalence, current screening practice and barriers to screening. A review. *Diabet Med* 2012;**29**:844–54. doi:10.1111/j.1464-5491.2011.03541.x
- 5 Wendland EM, Torloni MR, Falavigna M, *et al*. Gestational diabetes and pregnancy outcomes--a systematic review of the World Health Organization (WHO) and the International Association of Diabetes in Pregnancy Study Groups (IADPSG) diagnostic criteria. *BMC Pregnancy Childbirth* 2012;**12**:23. doi:10.1186/1471-2393-12-23
- 6 The HAPO Study Cooperative Research Group, Metzger BE, Lowe LP, *et al*. Hyperglycemia and adverse pregnancy outcomes. *N Engl J Med* 2008;**358**:1991–2002. doi:10.1056/NEJMoa0707943
- 7 Xiong X, Saunders LDD, Wang FLL, *et al*. Gestational diabetes mellitus: prevalence, risk factors, maternal and infant outcomes. *Int J Gynaecol Obs* 2001;**75**:221–8. doi:10.1016/S0020-7292(01)00496-9
- 8 Voormolen DN, de Wit L, van Rijn BB, *et al*. Neonatal Hypoglycemia Following Diet-Controlled and Insulin-Treated Gestational Diabetes Mellitus. *Diabetes Care* 2018;**41**:1385–90. doi:10.2337/dc18-0048
- 9 Buchanan T a, Xiang AH, Page K a. Gestational diabetes mellitus: risks and management during and after pregnancy. *Nat Rev Endocrinol* 2012;**8**:639–49. doi:10.1038/nrendo.2012.96
- 10 Scholtens DM, Kuang A, Lowe LP, *et al*. Hyperglycemia and Adverse Pregnancy Outcome Follow-up Study (HAPO FUS): Maternal Glycemia and Childhood Glucose Metabolism. *Diabetes Care* 2019;**42**:381–92. doi:10.2337/dc18-2021
- 11 Malcolm J. Through the looking glass: gestational diabetes as a predictor of maternal and offspring long-term health. *Diabetes Metab Res Rev* 2012;**28**:307–11. doi:10.1002/dmrr.2275
- 12 Tam WH, Ma RCW, Ozaki R, *et al*. In Utero Exposure to Maternal Hyperglycemia Increases Childhood Cardiometabolic Risk in Offspring. *Diabetes Care* 2017;**40**:679–86. doi:10.2337/dc16-2397
- 13 Crowther CA, Hiller JE, Moss JR, *et al*. Effect of treatment of gestational diabetes mellitus on pregnancy outcomes. *N Engl J Med* 2005;**352**:2477–86. doi:10.1056/NEJMoa042973
- 14 Landon MB, Spong CY, Thom E, *et al*. A multicenter, randomized trial of treatment for mild gestational diabetes. *N Engl J Med* 2009;**361**:1339–48. doi:10.1056/NEJMoa0902430
- 15 The Royal Australian College of General Practitioners. *General practice management of type 2 diabetes: 2016–18*. East Melbourne, Vic: : RACGP 2016.

- 1  
2  
3  
4 <https://www.racgp.org.au/clinical-resources/clinical-guidelines/key-racgp-guidelines/view-all-racgp-guidelines/management-of-type-2-diabetes/reproductive-health/gestational-diabetes#ref-num-65> (accessed 27 Mar 2019).
- 5  
6  
7 16 Committee on Practice Bulletins-Obstetrics. ACOG Practice Bulletin No. 190: Gestational  
8 Diabetes Mellitus. *Obs Gynecol* 2018;**131**:e49–64. doi:10.1097/AOG.0000000000002501
- 9  
10 17 American Diabetes Association. 13. Management of Diabetes in Pregnancy: Standards of  
11 Medical Care in Diabetes-2018. *Diabetes Care* 2018;**41**:S137–43. doi:10.2337/dc18-S013
- 12  
13 18 Nederlandse Vereniging Voor Obstetrie en Gynaecologie. DIABETES MELLITUS EN  
14 ZWANGERSCHAP Versie 2.0. 2010.[http://www.nvog-](http://www.nvog-documenten.nl/index.php?pagina=/richtlijn/item/pagina.php&richtlijn_id=863)  
15 [documenten.nl/index.php?pagina=/richtlijn/item/pagina.php&richtlijn\\_id=863](http://www.nvog-documenten.nl/index.php?pagina=/richtlijn/item/pagina.php&richtlijn_id=863) (accessed  
16 26 Oct 2016).
- 17  
18 19 National Institute for Health and Care Excellence. Diabetes in pregnancy: management  
19 from preconception to the postnatal period. 2015;;2–  
20 65.<https://www.nice.org.uk/guidance/ng3> (accessed 8 Nov 2018).
- 21  
22 20 Keely E, Berger H, Feig DS, *et al*. New Diabetes Canada Clinical Practice Guidelines for  
23 Diabetes and Pregnancy - What's Changed? *J Obstet Gynaecol Canada* 2018;**40**:1484–9.  
24 doi:10.1016/j.jogc.2018.06.024
- 25  
26 21 Society of Maternal-Fetal Medicine Publications Committee. SMFM Statement:  
27 Pharmacological treatment of gestational diabetes. *Am J Obs Gynecol* 2018;**218**:B2–4.  
28 doi:10.1016/j.ajog.2018.01.041
- 29  
30 22 Langer O, Conway DL, Berkus MD, *et al*. A comparison of glyburide and insulin in women  
31 with gestational diabetes mellitus. *N Engl J Med* 2000;**343**:1134–8.  
32 doi:10.1056/NEJM200010193431601
- 33  
34 23 Rowan JA, Hague WM, Gao W, *et al*. Metformin versus insulin for the treatment of  
35 gestational diabetes. *N Engl J Med* 2008;**358**:2003–15. doi:10.1056/NEJMoa0707193
- 36  
37 24 Langer O. Pharmacological treatment of gestational diabetes mellitus: point/counterpoint.  
38 *Am J Obs Gynecol* 2018;**218**:490–9. doi:10.1016/j.ajog.2018.01.024
- 39  
40 25 Hod M, Kapur A, Sacks DA, *et al*. The International Federation of Gynecology and  
41 Obstetrics (FIGO) Initiative on gestational diabetes mellitus: A pragmatic guide for  
42 diagnosis, management, and care. *Int J Gynaecol Obs* 2015;**131** Suppl:S173–211.  
43 doi:10.1016/S0020-7292(15)30007-2
- 44  
45 26 Camelo Castillo W, Boggess K, Stürmer T, *et al*. Trends in glyburide compared with insulin  
46 use for gestational diabetes treatment in the United States, 2000–2011. *Obs Gynecol*  
47 2014;**123**:1177–84. doi:10.1097/AOG.0000000000000285
- 48  
49 27 Brown J, Martis R, Hughes B, *et al*. Oral anti-diabetic pharmacological therapies for the  
50 treatment of women with gestational diabetes. *Cochrane Database Syst Rev*  
51 2017;**1**:CD011967. doi:10.1002/14651858.CD011967.pub2
- 52  
53 28 Brown J, Grzeskowiak L, Williamson K, *et al*. Insulin for the treatment of women with  
54 gestational diabetes. *Cochrane database Syst Rev* 2017;**11**:CD012037.  
55 doi:10.1002/14651858.CD012037.pub2
- 56  
57 29 Figueroa Gray M, Hsu C, Kiel L, *et al*. 'It's a Very Big Burden on Me': Women's Experiences  
58 Using Insulin for Gestational Diabetes. *Matern Child Heal J* 2017;**21**:1678–85.  
59 doi:10.1007/s10995-017-2261-8
- 60  
61 30 Maymone AC, Baillargeon J-PP, Menard J, *et al*. Oral hypoglycemic agents for gestational

- 1  
2  
3 diabetes mellitus? *Expert Opin Drug Saf* 2011;**10**:227–38.  
4 doi:10.1517/14740338.2011.521740  
5  
6 31 Ryu RJ, Hays KE, Hebert MF. Gestational diabetes mellitus management with oral  
7 hypoglycemic agents. *Semin Perinatol* 2014;**38**:508–15. doi:10.1053/j.semperi.2014.08.012  
8  
9 32 Latif L, Hyer S, Shehata H. Metformin effects on treatment satisfaction and quality of life  
10 in gestational diabetes. *Br J Diabetes Vasc Dis* 2013;**13**:178–82.  
11 doi:10.1177/1474651413493933  
12  
13 33 Bradley C, Todd C, Gorton T, *et al.* The development of an individualized questionnaire  
14 measure of perceived impact of diabetes on quality of life: the ADDQoL. *Qual Life Res*  
15 1999;**8**:79–91. <http://www.ncbi.nlm.nih.gov/pubmed/10457741>  
16  
17 34 Balsells M, Garcia-Patterson A, Sola I, *et al.* Glibenclamide, metformin, and insulin for the  
18 treatment of gestational diabetes: a systematic review and meta-analysis. *BMJ*  
19 2015;**350**:h102. doi:10.1136/bmj.h102  
20  
21 35 Yogev Y, Ben-Haroush A, Chen R, *et al.* Undiagnosed Asymptomatic Hypoglycemia. *Obstet*  
22 *Gynecol* 2004;**104**:88–93. doi:10.1097/01.AOG.0000129239.82126.a1  
23  
24 36 van Weelden W, Wekker V, de Wit L, *et al.* Long-Term Effects of Oral Antidiabetic Drugs  
25 During Pregnancy on Offspring: A Systematic Review and Meta-analysis of Follow-up  
26 Studies of RCTs. *Diabetes Ther* 2018;**9**:1811–29. doi:10.1007/s13300-018-0479-0  
27  
28 37 Nachum Z, Zafran N, Salim R, *et al.* Glyburide Versus Metformin and Their Combination  
29 for the Treatment of Gestational Diabetes Mellitus: A Randomized Controlled Study.  
30 *Diabetes Care* 2017;**40**:332–7. doi:10.2337/dc16-2307  
31  
32 38 Zorgevaluatie Nederland. Nederlandse Vereniging voor Obstetrie en Gynaecologie.  
33 <http://www.zorgevaluatienederland.nl/associations/1> (accessed 4 Feb 2019).  
34  
35 39 Netherlands Trial Register (NTR): The SUGAR-DIP trial; oral medication strategy versus  
36 insulin for diabetes in pregnancy. <https://www.trialregister.nl/trial/5953> (accessed 29 Jan  
37 2019).  
38  
39 40 Sénat M-V, Affres H, Letourneau A, *et al.* Effect of Glyburide vs Subcutaneous Insulin on  
40 Perinatal Complications Among Women With Gestational Diabetes: A Randomized  
41 Clinical Trial. *JAMA* 2018;**319**:1773–80. doi:10.1001/jama.2018.4072  
42  
43 41 Nederlandse Internisten Vereeniging (NIV). Diabetes en Zwangerschap. 2007.  
44  
45 42 Cornblath M, Hawdon JM, Williams AF, *et al.* Controversies regarding definition of  
46 neonatal hypoglycemia: suggested operational thresholds. *Pediatrics* 2000;**105**:1141–  
47 5. <http://www.ncbi.nlm.nih.gov/pubmed/10790476>  
48  
49 43 Visser GH a, Eilers PHC, Elferink-Stinkens PM, *et al.* New Dutch reference curves for  
50 birthweight by gestational age. *Early Hum Dev* 2009;**85**:737–44.  
51 doi:10.1016/j.earlhumdev.2009.09.008  
52  
53 44 Bradley C, Lewis KS. Measures of psychological well-being and treatment satisfaction  
54 developed from the responses of people with tablet-treated diabetes. *Diabet Med*  
55 1990;**7**:445–51. <http://www.ncbi.nlm.nih.gov/pubmed/2142043>  
56  
57 45 Bradley C, Bradley C, Bradley C. *Handbook of Psychology and Diabetes: A Guide to*  
58 *Psychological Measurement in Diabetes Research and Practice*. Chur, Switzerland: :  
59 Harwood Academic Publishers 1994.  
60  
61 46 Barendse SM, Speight J, Bradley C. The Renal Treatment Satisfaction Questionnaire  
(RTSQ): a measure of satisfaction with treatment for chronic kidney failure. *Am J Kidney*

- 1  
2  
3  
4  
5  
6  
7  
8  
9  
10  
11  
12  
13  
14  
15  
16  
17  
18  
19  
20  
21  
22  
23  
24  
25  
26  
27  
28  
29  
30  
31  
32  
33  
34
- Dis 2005;**45**:572–9. doi:10.1053/j.ajkd.2004.11.010
- 47 International Conference on Harmonisation of Technical Requirements for Registration of  
Pharmaceuticals for Human Use. ICH Harmonised Tripartite Guideline: Clinical Safety Data  
Management: Definitions and Standards for Expedited Reporting E2A.  
1994.[https://www.ich.org/fileadmin/Public\\_Web\\_Site/ICH\\_Products/Guidelines/Efficacy/E2A/Step4/E2A\\_Guideline.pdf](https://www.ich.org/fileadmin/Public_Web_Site/ICH_Products/Guidelines/Efficacy/E2A/Step4/E2A_Guideline.pdf)
- 48 Lamain-de Ruitter M, Kwee A, Naaktgeboren CA, *et al.* External validation of prognostic  
models to predict risk of gestational diabetes mellitus in one Dutch cohort: prospective  
multicentre cohort study. *BMJ* 2016;**354**:i4338. doi:10.1136/bmj.i4338
- 49 Zorginstituut Nederland. Richtlijn Voor Het Uitvoeren van Economische Evaluaties in de  
Gezondheidszorg. Diemen: 2015.
- 50 Herdman M, Gudex C, Lloyd A, *et al.* Development and preliminary testing of the new  
five-level version of EQ-5D (EQ-5D-5L). *Qual Life Res* 2011;**20**:1727–36.  
doi:10.1007/s11136-011-9903-x
- 51 Bouwmans C, Hakkaart- van Roijen L, Koopmanschap M, Krol M, Severens H BW. *Manual  
iMTA Productivity Cost Questionnaire (iPCQ)*. Rotterdam: : Institute for Medical  
Technology Assessment Erasmus Universiteit Rotterdam 2013.
- 52 Bouwmans C, Hakkaart- van Roijen L, Koopmanschap M, Krol M, Severens H, Brouwer W.  
*Manual iMTA Medical Consumption Questionnaire (iMCQ)*. Rotterdam: : Institute for  
Medical Technology Assessment Erasmus Universiteit Rotterdam 2013.
- 53 Fenwick E, O'Brien BJ, Briggs A. Cost-effectiveness acceptability curves--facts, fallacies and  
frequently asked questions. *Health Econ* 2004;**13**:405–15. doi:10.1002/hec.903
- 54 Zorgevaluatie Nederland. Zorgevaluatie Nederland Study website: SUGAR-DIP trial.  
<http://www.zorgevaluatienederland.nl/projects/29/downloads-and-links> (accessed 4 Feb  
2019).

## FIGURE HEADINGS:

### FIGURE 1:

Figure I: flowchart of comparator (oral glucose lowering drugs) versus control (insulin)

| Assessment for eligibility                                                                                                                                                                                                                                                                                                                                                                        |                                                                                                                                                                                                                                                                                                                                     |
|---------------------------------------------------------------------------------------------------------------------------------------------------------------------------------------------------------------------------------------------------------------------------------------------------------------------------------------------------------------------------------------------------|-------------------------------------------------------------------------------------------------------------------------------------------------------------------------------------------------------------------------------------------------------------------------------------------------------------------------------------|
| <p><b>Inclusion</b></p> <ul style="list-style-type: none"> <li>- Maternal age &gt;18 years</li> <li>- Singleton pregnancy</li> <li>- Diagnosis of GDM as per national guidelines</li> <li>- Indication for pharmacological treatment</li> <li>- Gestational age 16 - 34 weeks</li> <li>- Ability to understand Dutch or English</li> <li>- Ability to provide written informed consent</li> </ul> | <p><b>Exclusion</b></p> <ul style="list-style-type: none"> <li>- Pre-existing type 1 or 2 diabetes mellitus</li> <li>- Severe medical or psychiatric comorbidities</li> <li>- Significant liver disease or renal insufficiency</li> <li>- Fetus affected by major congenital birth defect and/or chromosomal abnormality</li> </ul> |

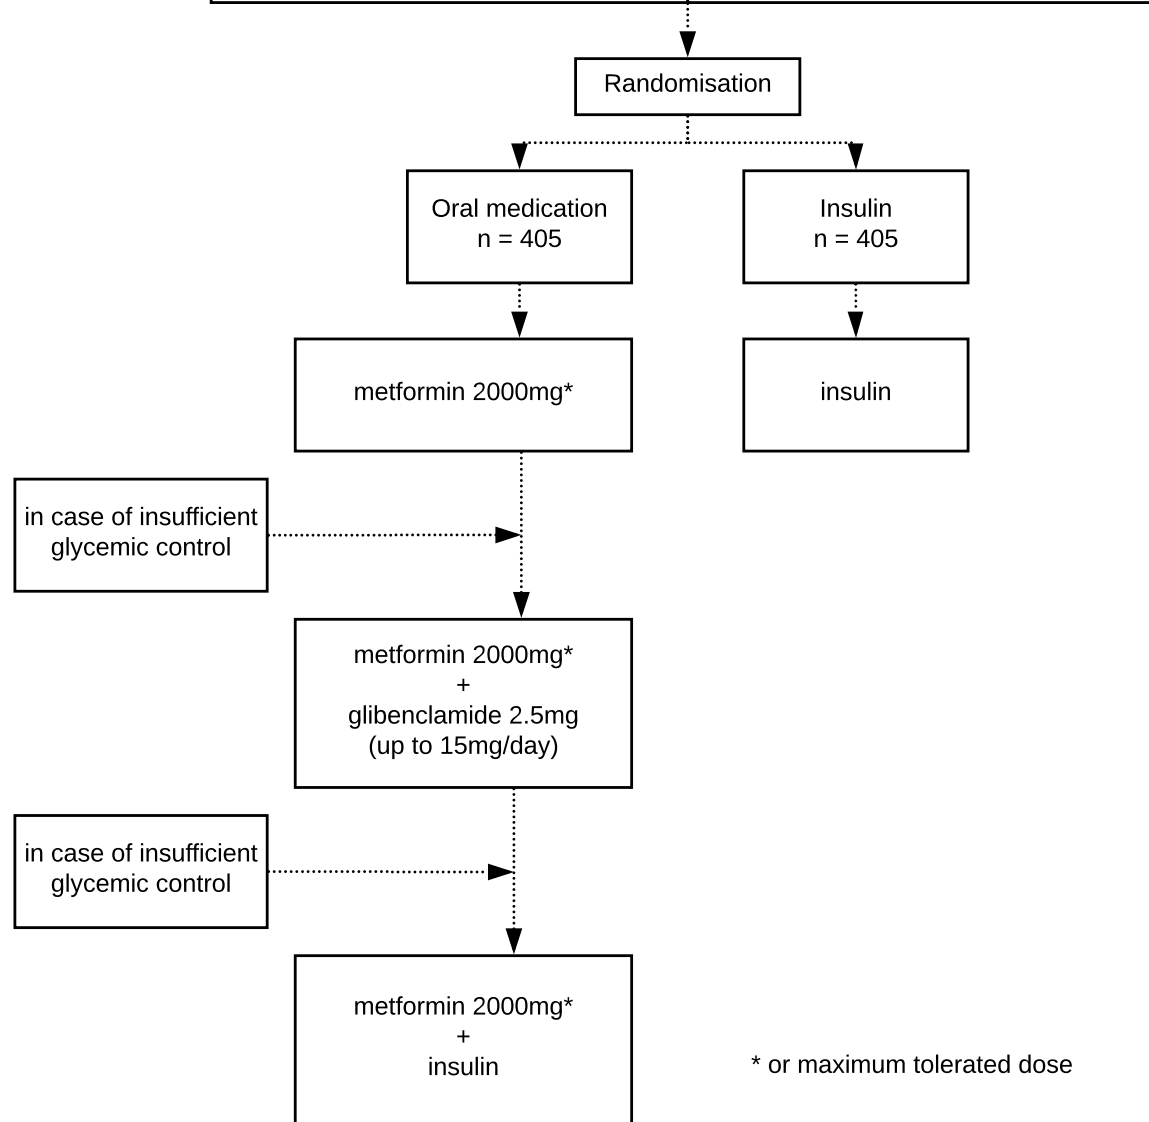

1  
2  
3  
4  
5  
6  
7  
8  
9  
10  
11  
12  
13  
14  
15  
16  
17  
18  
19  
20  
21  
22  
23  
24  
25  
26  
27  
28  
29  
30  
31  
32  
33  
34  
35  
36  
37  
38  
39  
40  
41  
42  
43  
44  
45  
46

## Supplemental file 1: SUGAR-DIP additional study parameters and endpoints

### Maternal baseline characteristics

- BMI at study entrance
- Age (y)
- Parity
- Mean arterial blood pressure at study entry (mmHg)
- Intoxications (smoking, alcohol use)
- Ethnicity: Caucasian, Indian/Pakistani/Bangladesi, Afro-Caribbean (Antilles, Surinam-creole), Hindu/Caribbean (Surinam Hindu), African (Sub-Saharan), Middle Eastern/North African (Turkish, Moroccan), Asian, Other
- PCOS; polycystic ovarian syndrome
- Thyroid problems: hypo- or hyperthyroidism
- History of gestational diabetes mellitus
- History of psychological problems
- Family history: diabetes mellitus, gestational diabetes, hypertension, preeclampsia, congenital defects
- Conception: spontaneous, fertility treatment (clomifene citrate, gonadotropins, IVF, ICSI)
- Reason for GDM screening
- Blood glucose measures of OGTT (fasting, post load)
- Gestational age at time of OGTT

### Neonatal characteristics

- Gestational age at delivery
- Birth weight (g)
- Weight at discharge (g)
- Sex
- Apgar score 5 – 10 minutes
- Umbilical artery pH levels
- Respiratory support > 24 hours
- Culture proven sepsis
- Neonatal blood glucose levels 1-3-6-12 (24) hours after delivery
- Intravenous glucose therapy
- Convulsions
- Intrauterine fetal death
- Neonatal death
- Congenital defect/anomaly



### Obstetric / delivery characteristics

- Ultrasound examinations: fetal biometry (abdominal circumference, femur length, head circumference, estimated fetal weight) amniotic fluid, fetal heart and brain (where available)
- Induction of labour
- Birth injury: shoulder dystocia (a delivery that requires additional obstetric maneuvers following failure of gentle downward traction on the fetal head to effect delivery of the shoulders), clavicle/humerus fracture or Erb's palsy
- Vacuum assisted delivery
- Blood loss (ml)
- Post-partum haemorrhage >1L
- Blood transfusion
- Sphincter rupture

### Diabetes related endpoints

- Ketoacidosis
- Fasting and postprandial blood glucose levels (study diary)
- Maternal HbA1c (study inclusion, 30 weeks and 36 weeks of gestation)
- Maternal weight gain >12kg
- Final daily dose of insulin (study diary)
- Final daily dose of metformin/glibenclamide (study diary)
- Time to reach glycemic control (study diary)
- Treatment failure: percentage of patients requiring insulin after metformin and glibenclamide
- Side effects: metformin, glibenclamide, insulin

### Biomarkers and laboratory measurements

- Cord-blood: C-peptide, glucose, insulin, triglycerides (where available)
- Cord-blood: metformin / glibenclamide levels (where available)
- Placenta: pathological examination (where available)

### Biobanking (where available)

- Maternal serum
- Placental biopsies
- Umbilical cord blood
- Umbilical cord tissue

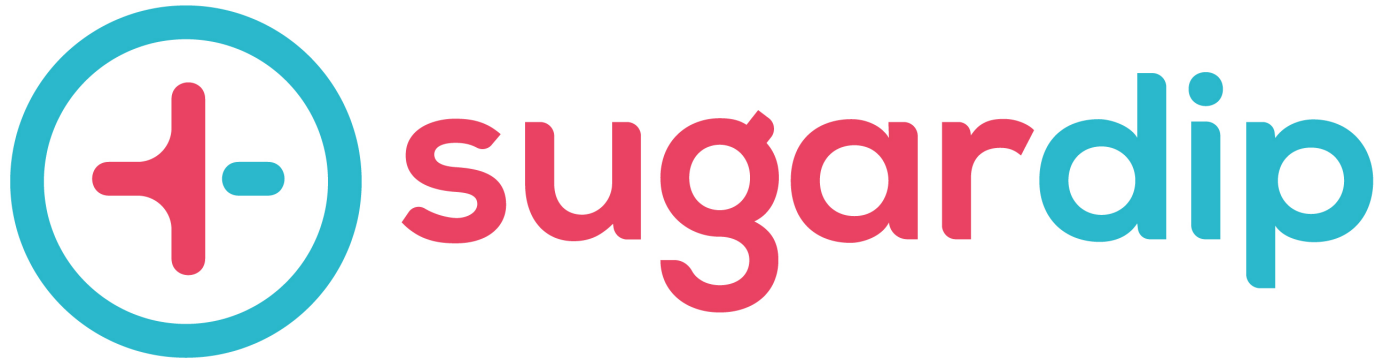

For peer review only

# SUGAR-DIP trial

Oral medication strategy versus insulin for diabetes in pregnancy

Electronic case report form

CRF data entry and randomization:

[www.castoredc.com](http://www.castoredc.com)

- Single possible answer  
 Multiple answers possible

| <b>General information</b>                                                                                                      |                                                                                                                                                                                                                                                                                                                                      |
|---------------------------------------------------------------------------------------------------------------------------------|--------------------------------------------------------------------------------------------------------------------------------------------------------------------------------------------------------------------------------------------------------------------------------------------------------------------------------------|
| Maternal age at time of randomization                                                                                           | (years)                                                                                                                                                                                                                                                                                                                              |
| Estimated date of delivery                                                                                                      | (dd-mm-yyyy)                                                                                                                                                                                                                                                                                                                         |
| <b>In-exclusion</b>                                                                                                             |                                                                                                                                                                                                                                                                                                                                      |
| Age 18 years or older                                                                                                           | <input type="radio"/> Yes<br><input type="radio"/> No                                                                                                                                                                                                                                                                                |
| Singleton pregnancy                                                                                                             | <input type="radio"/> Yes<br><input type="radio"/> No                                                                                                                                                                                                                                                                                |
| Diagnosis if gestational diabetes mellitus as per national guidelines                                                           | <input type="radio"/> Yes<br><input type="radio"/> No                                                                                                                                                                                                                                                                                |
| Indication for pharmacological treatment of GDM                                                                                 | <input type="radio"/> Yes<br><input type="radio"/> No                                                                                                                                                                                                                                                                                |
| Gestational age between 16 and 34 weeks                                                                                         | <input type="radio"/> Yes<br><input type="radio"/> No                                                                                                                                                                                                                                                                                |
| Ability to understand Dutch or English                                                                                          | <input type="radio"/> Yes<br><input type="radio"/> No                                                                                                                                                                                                                                                                                |
|                                                                                                                                 |                                                                                                                                                                                                                                                                                                                                      |
| Known pre-existent type I or II diabetes mellitus                                                                               | <input type="radio"/> Yes<br><input type="radio"/> No                                                                                                                                                                                                                                                                                |
| Severe medical or psychological comorbidity                                                                                     | <input type="radio"/> Yes<br><input type="radio"/> No                                                                                                                                                                                                                                                                                |
| Liver disease or kidney failure, or any other condition with contraindications for the use of either metformin or glibenclamide | <input type="radio"/> Yes<br><input type="radio"/> No                                                                                                                                                                                                                                                                                |
| Fetus with major congenital birth defect and/or chromosomal abnormality                                                         | <input type="radio"/> Yes<br><input type="radio"/> No                                                                                                                                                                                                                                                                                |
| <b>Informed consent &amp; Randomization</b>                                                                                     |                                                                                                                                                                                                                                                                                                                                      |
| Patient has provided written informed consent                                                                                   | <input type="radio"/> Yes<br><input type="radio"/> No                                                                                                                                                                                                                                                                                |
| Date of informed consent                                                                                                        | (dd-mm-yyyy)                                                                                                                                                                                                                                                                                                                         |
| Date of randomization                                                                                                           | (dd-mm-yyyy)                                                                                                                                                                                                                                                                                                                         |
| Gestational age at time of randomization                                                                                        | ..... weeks + ..... days                                                                                                                                                                                                                                                                                                             |
| <b>Medical history</b>                                                                                                          |                                                                                                                                                                                                                                                                                                                                      |
| Ethnicity                                                                                                                       | <input type="radio"/> Caucasian/white<br><input type="radio"/> Indian/Pakistani/Bangladesi/Hindu<br><input type="radio"/> Black/African (Sub-Sahara)<br><input type="radio"/> Middle Eastern + North African (Turkey, Morocco, Egypt)<br><input type="radio"/> Asian<br><input type="radio"/> Other<br><input type="radio"/> Unknown |
| Diagnosis of Polycystic Ovary Syndrome (PCOS)                                                                                   | <input type="radio"/> Yes<br><input type="radio"/> No                                                                                                                                                                                                                                                                                |
| Thyroid problems: hypo- or hyperthyroidism                                                                                      | <input type="radio"/> Hypothyroidism<br><input type="radio"/> Hyperthyroidism                                                                                                                                                                                                                                                        |

|                                                                                                  |                                                                                                                                                                                                                                                                                                                                                                                                               |
|--------------------------------------------------------------------------------------------------|---------------------------------------------------------------------------------------------------------------------------------------------------------------------------------------------------------------------------------------------------------------------------------------------------------------------------------------------------------------------------------------------------------------|
|                                                                                                  | <input type="radio"/> Thyroid problem, but type is unknown<br><input type="radio"/> No<br><input type="radio"/> Unknown                                                                                                                                                                                                                                                                                       |
| History of psychological problems                                                                | <input type="checkbox"/> Depression<br><input type="checkbox"/> Anxiety disorder<br><input type="checkbox"/> Burn-out<br><input type="checkbox"/> Other<br><input type="checkbox"/> None<br><input type="checkbox"/> Unknown                                                                                                                                                                                  |
| Maternal chronic or pre-existent hypertension                                                    | <input type="radio"/> Yes (requiring medication)<br><input type="radio"/> Yes (not requiring medication)<br><input type="radio"/> No<br><input type="radio"/> Unknown                                                                                                                                                                                                                                         |
| Maternal medication use (other than folic acid and vitamins) during pregnancy                    | <input type="checkbox"/> No<br><input type="checkbox"/> Aspirin (Acetylsalicylic acid)<br><input type="checkbox"/> Levothyroxine / Thyrox<br><input type="checkbox"/> SSRI (including sertraline, (es)citalopram, paroxetine, fluoxetine)<br><input type="checkbox"/> Tricyclic antidepressant (including amitriptyline, nortriptyline)<br><input type="checkbox"/> Other<br><input type="checkbox"/> Unknown |
| <b>Family history</b>                                                                            |                                                                                                                                                                                                                                                                                                                                                                                                               |
| Family history of type I / type II diabetes mellitus (1 <sup>st</sup> or 2 <sup>nd</sup> degree) | <input type="radio"/> Yes<br><input type="radio"/> No<br><input type="radio"/> Unknown                                                                                                                                                                                                                                                                                                                        |
| Family history of gestational diabetes mellitus (1 <sup>st</sup> or 2 <sup>nd</sup> degree)      | <input type="radio"/> Yes<br><input type="radio"/> No<br><input type="radio"/> Unknown                                                                                                                                                                                                                                                                                                                        |
| Family history if hypertension (1 <sup>st</sup> or 2 <sup>nd</sup> degree)                       | <input type="radio"/> Yes<br><input type="radio"/> No<br><input type="radio"/> Unknown                                                                                                                                                                                                                                                                                                                        |
| Family history of preeclampsia (1 <sup>st</sup> or 2 <sup>nd</sup> degree)                       | <input type="radio"/> Yes<br><input type="radio"/> No<br><input type="radio"/> Unknown                                                                                                                                                                                                                                                                                                                        |
| Family history of congenital defects (1 <sup>st</sup> or 2 <sup>nd</sup> degree)                 | <input type="radio"/> Yes<br><input type="radio"/> No<br><input type="radio"/> Unknown                                                                                                                                                                                                                                                                                                                        |
| <b>Obstetric history</b>                                                                         |                                                                                                                                                                                                                                                                                                                                                                                                               |
| Gravidity                                                                                        | (n)                                                                                                                                                                                                                                                                                                                                                                                                           |
| Parity                                                                                           | (n)                                                                                                                                                                                                                                                                                                                                                                                                           |
| Living children                                                                                  | (n)                                                                                                                                                                                                                                                                                                                                                                                                           |
| Miscarriage – spontaneous abortion                                                               | (n)                                                                                                                                                                                                                                                                                                                                                                                                           |
| Abortus provocatus – induced abortion                                                            | (n)                                                                                                                                                                                                                                                                                                                                                                                                           |
| Extra-uterine gravidity                                                                          | (n)                                                                                                                                                                                                                                                                                                                                                                                                           |
| Intra-uterine death > 16 weeks                                                                   | (n)                                                                                                                                                                                                                                                                                                                                                                                                           |
| Any previous pregnancy with gestational diabetes mellitus?                                       | <input type="radio"/> No (no GDM in previous pregnancies)<br><input type="radio"/> Yes<br><input type="radio"/> Unknown                                                                                                                                                                                                                                                                                       |

|                                                                                                  |                                                                                                                                                                                                                                                                    |
|--------------------------------------------------------------------------------------------------|--------------------------------------------------------------------------------------------------------------------------------------------------------------------------------------------------------------------------------------------------------------------|
| How many pregnancies with gestational diabetes mellitus?                                         | (n)                                                                                                                                                                                                                                                                |
| Any pregnancy with GDM treated with insulin?                                                     | <input type="radio"/> No<br><input type="radio"/> Yes<br><input type="radio"/> Unknown                                                                                                                                                                             |
| Any previous pregnancy with pregnancy induced hypertension (PIH)?                                | <input type="radio"/> No (no PIH in previous pregnancies)<br><input type="radio"/> Yes<br><input type="radio"/> Unknown                                                                                                                                            |
| Any previous pregnancy with preeclampsia (PE)?                                                   | <input type="radio"/> No (no PE in previous pregnancies)<br><input type="radio"/> Yes<br><input type="radio"/> Unknown                                                                                                                                             |
| Any previous pregnancy with Hemolysis Elevated Liver enzymes and Low Platelets syndrome (HELLP)? | <input type="radio"/> No (no HELLP in previous pregnancies)<br><input type="radio"/> Yes<br><input type="radio"/> Unknown                                                                                                                                          |
| Any previous pregnancy with a preterm delivery (< 37 weeks of gestation)                         | <input type="radio"/> No (no preterm delivery in previous pregnancies)<br><input type="radio"/> Yes<br><input type="radio"/> Unknown                                                                                                                               |
| A caesarean section (primary or secondary) in the past?                                          | <input type="radio"/> No (no caesarean section in the past)<br><input type="radio"/> Yes<br><input type="radio"/> Unknown                                                                                                                                          |
| Any hemorrhagia postpartum (HPP, blood loss $\geq$ 1000ml) in the past?                          | <input type="radio"/> No (no HPP in the past)<br><input type="radio"/> Yes<br><input type="radio"/> Unknown                                                                                                                                                        |
| Please complete the following questions for all previous pregnancies > 16 weeks                  | Parity number: .....<br>Gestational age: ..... weeks + ..... days<br>Gender: male, female, unknown<br>Birth weight (grams): .....                                                                                                                                  |
| <b>Current pregnancy</b>                                                                         |                                                                                                                                                                                                                                                                    |
| Mode of conception                                                                               | <input type="radio"/> Spontaneous<br><input type="radio"/> Clomifene ovulation induction<br><input type="radio"/> Intra-uterine insemination (IUI)<br><input type="radio"/> IVF / ICSI<br><input type="radio"/> Egg cell donation<br><input type="radio"/> Unknown |
| Maternal height                                                                                  | (cm)                                                                                                                                                                                                                                                               |
| Maternal weight at start of pregnancy                                                            | (kg)                                                                                                                                                                                                                                                               |
| Maternal weight at time of study inclusion                                                       | (kg)                                                                                                                                                                                                                                                               |
| Maternal weight at time of delivery / last pre-delivery visit                                    | (kg)                                                                                                                                                                                                                                                               |
| Maternal weight gain (total) >12kg                                                               | <input type="radio"/> Yes<br><input type="radio"/> No<br><input type="radio"/> Unknown                                                                                                                                                                             |
| Maternal blood pressure systolic at first antenatal visit                                        | (mmHg)                                                                                                                                                                                                                                                             |
| Maternal blood pressure diastolic at first antenatal visit                                       | (mmHg)                                                                                                                                                                                                                                                             |
| Smoking during pregnancy                                                                         | <input type="radio"/> No                                                                                                                                                                                                                                           |

|                                                                                 |                                                                                                                                                                                                                                                                                                                                                                                                                                 |
|---------------------------------------------------------------------------------|---------------------------------------------------------------------------------------------------------------------------------------------------------------------------------------------------------------------------------------------------------------------------------------------------------------------------------------------------------------------------------------------------------------------------------|
|                                                                                 | <ul style="list-style-type: none"> <li><input type="radio"/> Quit in first trimester</li> <li><input type="radio"/> Quit later in pregnancy</li> <li><input type="radio"/> Yes (still smoking)</li> <li><input type="radio"/> Unknown</li> </ul>                                                                                                                                                                                |
| Alcohol use during pregnancy                                                    | <ul style="list-style-type: none"> <li><input type="radio"/> Yes</li> <li><input type="radio"/> No</li> <li><input type="radio"/> Unknown</li> </ul>                                                                                                                                                                                                                                                                            |
| Glucose value (random) in first trimester                                       | (mmol/L)                                                                                                                                                                                                                                                                                                                                                                                                                        |
| Diagnostic test used to determine gestational diabetes                          | <ul style="list-style-type: none"> <li><input type="radio"/> Oral glucose tolerance test (75 gram)</li> <li><input type="radio"/> Oral glucose tolerance test (100 gram)</li> <li><input type="radio"/> Fasting glucose level</li> <li><input type="radio"/> Glucose day curve</li> <li><input type="radio"/> Other</li> </ul>                                                                                                  |
| Date of GDM diagnosis                                                           | (dd-mm-yyyy)                                                                                                                                                                                                                                                                                                                                                                                                                    |
| Glucose value of 75 gram OGTT fasting (laboratory)                              | (mmol/L)                                                                                                                                                                                                                                                                                                                                                                                                                        |
| Glucose value of 75 gram OGTT 2 hours (laboratory)                              | (mmol/L)                                                                                                                                                                                                                                                                                                                                                                                                                        |
| Glucose value of 100 gram OGTT fasting (laboratory)                             | (mmol/L)                                                                                                                                                                                                                                                                                                                                                                                                                        |
| Glucose value of 100 gram OGTT 2 hours (laboratory)                             | (mmol/L)                                                                                                                                                                                                                                                                                                                                                                                                                        |
| Glucose value of 100 gram OGTT 3 hours (laboratory)                             | (mmol/L)                                                                                                                                                                                                                                                                                                                                                                                                                        |
| Glucose value fasting (laboratory)                                              | (mmol/L)                                                                                                                                                                                                                                                                                                                                                                                                                        |
| Highest glucose value of glucose day curve                                      | (mmol/L)                                                                                                                                                                                                                                                                                                                                                                                                                        |
| Main reason to perform OGTT                                                     | <ul style="list-style-type: none"> <li><input type="radio"/> Suspected macrosomia/estimated fetal weight &gt;p90 (current pregnancy)</li> <li><input type="radio"/> Family history with diabetes</li> <li><input type="radio"/> Obesity</li> <li><input type="radio"/> Prior pregnancy with GDM</li> <li><input type="radio"/> Ethnicity</li> <li><input type="radio"/> Other</li> <li><input type="radio"/> Unknown</li> </ul> |
| <b>Pregnancy complications</b>                                                  |                                                                                                                                                                                                                                                                                                                                                                                                                                 |
| Pregnancy induced hypertension (systolic BP > 140mmHg or diastolic BP > 90mmHg) | <ul style="list-style-type: none"> <li><input type="radio"/> Yes</li> <li><input type="radio"/> No</li> <li><input type="radio"/> Unknown</li> </ul>                                                                                                                                                                                                                                                                            |
| Pregnancy induced hypertension                                                  | <ul style="list-style-type: none"> <li><input type="radio"/> Without medication</li> <li><input type="radio"/> With medication (for instance labetalol or methyldopa)</li> <li><input type="radio"/> Unknown whether medication was used</li> <li><input type="radio"/> Other</li> </ul>                                                                                                                                        |
| Preeclampsia (hypertension with albuminuria)                                    | <ul style="list-style-type: none"> <li><input type="radio"/> Yes</li> <li><input type="radio"/> No</li> <li><input type="radio"/> Unknown</li> </ul>                                                                                                                                                                                                                                                                            |
| HELLP                                                                           | <ul style="list-style-type: none"> <li><input type="radio"/> Yes</li> <li><input type="radio"/> No</li> </ul>                                                                                                                                                                                                                                                                                                                   |

|                                                                                           |                                                                                                                                                                                                                                                                                                                                                                                                                                                                                                                                           |
|-------------------------------------------------------------------------------------------|-------------------------------------------------------------------------------------------------------------------------------------------------------------------------------------------------------------------------------------------------------------------------------------------------------------------------------------------------------------------------------------------------------------------------------------------------------------------------------------------------------------------------------------------|
|                                                                                           | <input type="radio"/> Unknown                                                                                                                                                                                                                                                                                                                                                                                                                                                                                                             |
| Trombo-embolic complications (deep venous thrombosis or lung-embolus)                     | <input type="radio"/> Yes<br><input type="radio"/> No<br><input type="radio"/> Unknown                                                                                                                                                                                                                                                                                                                                                                                                                                                    |
| Hospital admission because of severe glycemic dysregulation                               | <input type="radio"/> Yes<br><input type="radio"/> No<br><input type="radio"/> Unknown                                                                                                                                                                                                                                                                                                                                                                                                                                                    |
| Fetal structural defects (ultrasound)                                                     | <input type="radio"/> Yes<br><input type="radio"/> No<br><input type="radio"/> Unknown                                                                                                                                                                                                                                                                                                                                                                                                                                                    |
| Fetal structural defects (ultrasound)                                                     | <input type="checkbox"/> Central nervous system, including spina bifida and anencephaly<br><input type="checkbox"/> Skeletal system, including caudal regression syndrome, limb defects and sacral agenesis<br><input type="checkbox"/> Cardiovascular, including transposition of the great vessels, septal defects, single umbilical artery (SUA), coarctation of the aorta<br><input type="checkbox"/> Gastrointestinal, including duodenal atresia<br><input type="checkbox"/> Unknown which system<br><input type="checkbox"/> Other |
| Macrosomia (EFW >p90 or FAC >p90 or mentioned in conclusion)                              | <input type="radio"/> Yes<br><input type="radio"/> No<br><input type="radio"/> Unknown                                                                                                                                                                                                                                                                                                                                                                                                                                                    |
| Intra-uterine growth restriction (IUGR) (EFW <p10 or FAC <p10 or mentioned in conclusion) | <input type="radio"/> Yes<br><input type="radio"/> No<br><input type="radio"/> Unknown                                                                                                                                                                                                                                                                                                                                                                                                                                                    |
| Polyhydramnios (ultrasound)                                                               | <input type="radio"/> Yes<br><input type="radio"/> No<br><input type="radio"/> Unknown                                                                                                                                                                                                                                                                                                                                                                                                                                                    |
| Oligohydramnios (ultrasound)                                                              | <input type="radio"/> Yes<br><input type="radio"/> No<br><input type="radio"/> Unknown                                                                                                                                                                                                                                                                                                                                                                                                                                                    |
| Corticosteroid used? (for instance because of imminent premature birth)                   | <input type="radio"/> Yes<br><input type="radio"/> No<br><input type="radio"/> Unknown                                                                                                                                                                                                                                                                                                                                                                                                                                                    |
| Intra-uterine death                                                                       | <input type="radio"/> Yes<br><input type="radio"/> No                                                                                                                                                                                                                                                                                                                                                                                                                                                                                     |
| Date of intra-uterine death                                                               | (dd-mm-yyyy)                                                                                                                                                                                                                                                                                                                                                                                                                                                                                                                              |
| <b>Delivery</b>                                                                           |                                                                                                                                                                                                                                                                                                                                                                                                                                                                                                                                           |
| Date of last dose of antidiabetic medication                                              | (dd-mm-yyyy)                                                                                                                                                                                                                                                                                                                                                                                                                                                                                                                              |
| Time of last dose of antidiabetic medication                                              | (hh-mm)                                                                                                                                                                                                                                                                                                                                                                                                                                                                                                                                   |
| Onset of labour                                                                           | <input type="radio"/> Spontaneously<br><input type="radio"/> Primary caesarean section<br><input type="radio"/> Induction                                                                                                                                                                                                                                                                                                                                                                                                                 |
| Was induction planned for a different reason than gestational diabetes mellitus?          | <input type="radio"/> Yes<br><input type="radio"/> No                                                                                                                                                                                                                                                                                                                                                                                                                                                                                     |

|                                          |                                                                                                                                                                                                                                                                                                                                                                                                                                                                                                                                                                                                                                                                                                                                                                                 |
|------------------------------------------|---------------------------------------------------------------------------------------------------------------------------------------------------------------------------------------------------------------------------------------------------------------------------------------------------------------------------------------------------------------------------------------------------------------------------------------------------------------------------------------------------------------------------------------------------------------------------------------------------------------------------------------------------------------------------------------------------------------------------------------------------------------------------------|
|                                          | <input type="radio"/> Unknown                                                                                                                                                                                                                                                                                                                                                                                                                                                                                                                                                                                                                                                                                                                                                   |
| Reason for induction                     | <input type="checkbox"/> Elective<br><input type="checkbox"/> Ruptured membranes<br><input type="checkbox"/> Hypertension<br><input type="checkbox"/> Preeclampsia<br><input type="checkbox"/> HELLP syndrome<br><input type="checkbox"/> Maternal: blood glucose dysregulation<br><input type="checkbox"/> Maternal: other → specify<br><input type="checkbox"/> Fetal: suspected macrosomia<br><input type="checkbox"/> Fetal: suspected intra-uterine growth restriction<br><input type="checkbox"/> Fetal: no movements<br><input type="checkbox"/> Fetal: heart rate anomaly<br><input type="checkbox"/> Fetal: oligohydramnios<br><input type="checkbox"/> Fetal: meconium<br><input type="checkbox"/> Fetal: other → specify<br><input type="checkbox"/> Other → specify |
| Method of induction                      | <input type="checkbox"/> Foley catheter / mechanical<br><input type="checkbox"/> Prostaglandins<br><input type="checkbox"/> Amniotomy<br><input type="checkbox"/> Oxytocin<br><input type="checkbox"/> Other<br><input type="checkbox"/> Unknown                                                                                                                                                                                                                                                                                                                                                                                                                                                                                                                                |
| Indication for primary caesarean section | <input type="checkbox"/> Elective: breech<br><input type="checkbox"/> Elective: obstetric history (previous caesarean section)<br><input type="checkbox"/> Elective: obstetric history (total sphincter rupture)<br><input type="checkbox"/> Elective: obstetric history (other)<br><input type="checkbox"/> Fetal distress<br><input type="checkbox"/> Fetal: intra-uterine growth restriction<br><input type="checkbox"/> Fetal: other<br><input type="checkbox"/> Maternal: hypertension<br><input type="checkbox"/> Maternal: preeclampsia<br><input type="checkbox"/> Maternal: HELLP syndrome<br><input type="checkbox"/> Maternal: other<br><input type="checkbox"/> Unknown                                                                                             |
| Pain relief during delivery              | <input type="checkbox"/> None<br><input type="checkbox"/> Opioid subcutaneous (pethidine)<br><input type="checkbox"/> Opioid intravenous (remifentanyl)<br><input type="checkbox"/> Nitrous oxide<br><input type="checkbox"/> Epidural<br><input type="checkbox"/> Other<br><input type="checkbox"/> Unknown                                                                                                                                                                                                                                                                                                                                                                                                                                                                    |
| Medication during labour                 | <input type="checkbox"/> Oxytocin<br><input type="checkbox"/> Antibiotics<br><input type="checkbox"/> Tocolytics<br><input type="checkbox"/> Glucose/insulin intravenous<br><input type="checkbox"/> Antihypertensive agents intravenous<br><input type="checkbox"/> Other → specify                                                                                                                                                                                                                                                                                                                                                                                                                                                                                            |



|                                                   |                                                                                                                                                                                                                                                                                                                                                                                                                                                                         |
|---------------------------------------------------|-------------------------------------------------------------------------------------------------------------------------------------------------------------------------------------------------------------------------------------------------------------------------------------------------------------------------------------------------------------------------------------------------------------------------------------------------------------------------|
|                                                   | <input type="checkbox"/> None<br><input type="checkbox"/> Unknown                                                                                                                                                                                                                                                                                                                                                                                                       |
| Fever during delivery                             | <input type="radio"/> No<br><input type="radio"/> Yes (>38°C <38.5°C)<br><input type="radio"/> Yes (≥38.5°C)<br><input type="radio"/> Unknown                                                                                                                                                                                                                                                                                                                           |
| Fetal presentation                                | <input type="radio"/> Cephalic<br><input type="radio"/> Breech<br><input type="radio"/> Other                                                                                                                                                                                                                                                                                                                                                                           |
| Route of delivery                                 | <input type="radio"/> Vaginal, spontaneously<br><input type="radio"/> Instrumental (vacuum extraction)<br><input type="radio"/> Instrumental (forcipal extraction)<br><input type="radio"/> Secondary caesarean section                                                                                                                                                                                                                                                 |
| Indication for vacuum / forcipal extraction       | <input type="radio"/> Fetal distress<br><input type="radio"/> Failure to progress<br><input type="radio"/> Maternal indication<br><input type="radio"/> Other fetal indication<br><input type="radio"/> Unknown                                                                                                                                                                                                                                                         |
| Indication for secondary caesarean section        | <input type="radio"/> Fetal distress<br><input type="radio"/> Failure to progress<br><input type="radio"/> Failed induction<br><input type="radio"/> Maternal indication<br><input type="radio"/> Failed vacuum / forcipal extraction<br><input type="radio"/> Other fetal indication<br><input type="radio"/> Unknown                                                                                                                                                  |
| Were maneuvers used because of shoulder dystocia? | <input type="checkbox"/> No (no shoulder dystocia)<br><input type="checkbox"/> Traction to the fetal head<br><input type="checkbox"/> McRoberts<br><input type="checkbox"/> Rubin<br><input type="checkbox"/> All-fours<br><input type="checkbox"/> Manual delivery of posterior arm<br><input type="checkbox"/> Intentional breaking of clavicle<br><input type="checkbox"/> Shoulder dystocia but unknown which maneuvers were used<br><input type="checkbox"/> Other |
| Amniotic fluid                                    | <input type="radio"/> Clear<br><input type="radio"/> Meconium stained<br><input type="radio"/> Unknown                                                                                                                                                                                                                                                                                                                                                                  |
| Delivery of the placenta                          | <input type="radio"/> Spontaneously / controlled cord traction<br><input type="radio"/> Manual removal in operating room<br><input type="radio"/> Removed during caesarean section<br><input type="radio"/> Unknown                                                                                                                                                                                                                                                     |
| Total blood loss                                  | (ml)                                                                                                                                                                                                                                                                                                                                                                                                                                                                    |
| Blood transfusion                                 | <input type="radio"/> Yes<br><input type="radio"/> No<br><input type="radio"/> Unknown                                                                                                                                                                                                                                                                                                                                                                                  |
| Perineum                                          | <input type="checkbox"/> No laceration(s)<br><input type="checkbox"/> First / second degree laceration(s)                                                                                                                                                                                                                                                                                                                                                               |

|                                                   |                                                                                                                                                                                   |
|---------------------------------------------------|-----------------------------------------------------------------------------------------------------------------------------------------------------------------------------------|
|                                                   | <input type="checkbox"/> Third degree laceration(s)<br><input type="checkbox"/> Episiotomy<br><input type="checkbox"/> Unknown                                                    |
| <b>Neonatal data</b>                              |                                                                                                                                                                                   |
| Date of birth                                     | (dd-mm-yyyy)                                                                                                                                                                      |
| Gestational age at birth                          | ..... weeks + ..... days                                                                                                                                                          |
| Live birth                                        | <input type="radio"/> Yes<br><input type="radio"/> No                                                                                                                             |
| Neonatal death                                    | <input type="radio"/> No<br><input type="radio"/> Yes (intra-uterine death)<br><input type="radio"/> Yes, <24 hours postpartum<br><input type="radio"/> Yes, >24 hours postpartum |
| Gender                                            | <input type="radio"/> Female<br><input type="radio"/> Male<br><input type="radio"/> Unknown                                                                                       |
| Apgar score 1 minute postpartum                   |                                                                                                                                                                                   |
| Apgar score 5 minutes postpartum                  |                                                                                                                                                                                   |
| Apgar score 10 minutes postpartum                 |                                                                                                                                                                                   |
| Umbilical cord blood pH (arterial)                |                                                                                                                                                                                   |
| Umbilical cord blood base excess (arterial)       |                                                                                                                                                                                   |
| Umbilical cord blood pH (venous)                  |                                                                                                                                                                                   |
| Umbilical cord blood base excess (venous)         |                                                                                                                                                                                   |
| Birth weight                                      | (grams)                                                                                                                                                                           |
| Fracture                                          | <input type="checkbox"/> None<br><input type="checkbox"/> Humerus<br><input type="checkbox"/> Clavicle<br><input type="checkbox"/> Other<br><input type="checkbox"/> Unknown      |
| Erbs palsy                                        | <input type="radio"/> No<br><input type="radio"/> Yes<br><input type="radio"/> Unknown                                                                                            |
| Preterm birth (<37 weeks of gestation)            | <input type="radio"/> No<br><input type="radio"/> Yes (iatrogenic)<br><input type="radio"/> Yes (spontaneous)                                                                     |
| Neonatal congenital malformation: heart           | <input type="radio"/> No<br><input type="radio"/> Yes<br><input type="radio"/> Unknown                                                                                            |
| Neonatal congenital malformation: neural tube     | <input type="radio"/> No<br><input type="radio"/> Yes<br><input type="radio"/> Unknown                                                                                            |
| Neonatal congenital malformation: urogenital      | <input type="radio"/> No<br><input type="radio"/> Yes<br><input type="radio"/> Unknown                                                                                            |
| Neonatal congenital malformation: other           | <input type="radio"/> No<br><input type="radio"/> Yes<br><input type="radio"/> Unknown                                                                                            |
| First neonatal glucose postpartum                 | (mmol/L)                                                                                                                                                                          |
| Date of first neonatal glucose testing postpartum | (dd-mm-yyyy)                                                                                                                                                                      |
| Time of first neonatal glucose testing postpartum | (hh:mm)                                                                                                                                                                           |

|    |                                                                                                       |                                                                                                                                                                                                                                                                                                                                                                                                                                                                                                                                                                                                                                |
|----|-------------------------------------------------------------------------------------------------------|--------------------------------------------------------------------------------------------------------------------------------------------------------------------------------------------------------------------------------------------------------------------------------------------------------------------------------------------------------------------------------------------------------------------------------------------------------------------------------------------------------------------------------------------------------------------------------------------------------------------------------|
| 1  | Second neonatal glucose value postpartum                                                              | (mmol/L)                                                                                                                                                                                                                                                                                                                                                                                                                                                                                                                                                                                                                       |
| 2  | Date of second neonatal glucose testing postpartum                                                    | (dd-mm-yyyy)                                                                                                                                                                                                                                                                                                                                                                                                                                                                                                                                                                                                                   |
| 3  | Time of second neonatal glucose testing postpartum                                                    | (hh:mm)                                                                                                                                                                                                                                                                                                                                                                                                                                                                                                                                                                                                                        |
| 4  | Third neonatal glucose value postpartum                                                               | (mmol/L)                                                                                                                                                                                                                                                                                                                                                                                                                                                                                                                                                                                                                       |
| 5  | Date of third neonatal glucose testing postpartum                                                     | (dd-mm-yyyy)                                                                                                                                                                                                                                                                                                                                                                                                                                                                                                                                                                                                                   |
| 6  | Time of third neonatal glucose testing postpartum                                                     | (hh:mm)                                                                                                                                                                                                                                                                                                                                                                                                                                                                                                                                                                                                                        |
| 7  | Fourth neonatal glucose value postpartum                                                              | (mmol/L)                                                                                                                                                                                                                                                                                                                                                                                                                                                                                                                                                                                                                       |
| 8  | Date of fourth neonatal glucose testing postpartum                                                    | (dd-mm-yyyy)                                                                                                                                                                                                                                                                                                                                                                                                                                                                                                                                                                                                                   |
| 9  | Time of fourth neonatal glucose testing postpartum                                                    | (hh:mm)                                                                                                                                                                                                                                                                                                                                                                                                                                                                                                                                                                                                                        |
| 10 | Fifth neonatal glucose value postpartum                                                               | (mmol/L)                                                                                                                                                                                                                                                                                                                                                                                                                                                                                                                                                                                                                       |
| 11 | Date of fifth neonatal glucose testing postpartum                                                     | (dd-mm-yyyy)                                                                                                                                                                                                                                                                                                                                                                                                                                                                                                                                                                                                                   |
| 12 | Time of fifth neonatal glucose testing postpartum                                                     | (hh:mm)                                                                                                                                                                                                                                                                                                                                                                                                                                                                                                                                                                                                                        |
| 13 | Sixth neonatal glucose value postpartum                                                               | (mmol/L)                                                                                                                                                                                                                                                                                                                                                                                                                                                                                                                                                                                                                       |
| 14 | Date of sixth neonatal glucose testing postpartum                                                     | (dd-mm-yyyy)                                                                                                                                                                                                                                                                                                                                                                                                                                                                                                                                                                                                                   |
| 15 | Time of sixth neonatal glucose testing postpartum                                                     | (hh:mm)                                                                                                                                                                                                                                                                                                                                                                                                                                                                                                                                                                                                                        |
| 16 | Any neonatal glucose value between 2.0-2.6mmol/L ( $\geq 2.0 < 2.7$ ) during in hospital admission?   | <ul style="list-style-type: none"> <li><input type="radio"/> No</li> <li><input type="radio"/> Yes, one value between 2.0 and 2.6</li> <li><input type="radio"/> Yes, more than one value between 2.0 and 2.6</li> <li><input type="radio"/> Unknown</li> </ul>                                                                                                                                                                                                                                                                                                                                                                |
| 17 | Any neonatal glucose value $< 2.0$ mmol/L during hospital admission?                                  | <ul style="list-style-type: none"> <li><input type="radio"/> No</li> <li><input type="radio"/> Yes, one value <math>&lt; 2.0</math></li> <li><input type="radio"/> Yes, more than one value <math>&lt; 2.0</math></li> <li><input type="radio"/> Unknown</li> </ul>                                                                                                                                                                                                                                                                                                                                                            |
| 18 | <b>Postpartum</b>                                                                                     |                                                                                                                                                                                                                                                                                                                                                                                                                                                                                                                                                                                                                                |
| 19 | Were mother or child admitted directly postpartum? (including postpartum observation of mother/child) | <ul style="list-style-type: none"> <li><input type="radio"/> No (mother and child went home directly after delivery)</li> <li><input type="radio"/> Yes, maternal admission only</li> <li><input type="radio"/> Yes, maternal and neonatal admission</li> <li><input type="radio"/> Yes, neonatal admission only</li> </ul>                                                                                                                                                                                                                                                                                                    |
| 20 | Maternal: what was the reason for admission?                                                          | <ul style="list-style-type: none"> <li><input type="checkbox"/> Maternal observation/routine stay (for instance because of more blood loss than usual or post-caesarean)</li> <li><input type="checkbox"/> Neonatal observation (for instance because of blood glucose evaluation)</li> <li><input type="checkbox"/> Fluxus (HPP)</li> <li><input type="checkbox"/> Pregnancy induced hypertension</li> <li><input type="checkbox"/> Preeclampsia</li> <li><input type="checkbox"/> HELLP syndrome</li> <li><input type="checkbox"/> Glycemic dysregulation</li> <li><input type="checkbox"/> Thrombo-embolic event</li> </ul> |

|                                              |                                                                                                                                                                                                                                                                                                                                                                                                                                                                                                                                                                                                                                                                                                                                                                                                                                                                                                                                                                                                                                                               |
|----------------------------------------------|---------------------------------------------------------------------------------------------------------------------------------------------------------------------------------------------------------------------------------------------------------------------------------------------------------------------------------------------------------------------------------------------------------------------------------------------------------------------------------------------------------------------------------------------------------------------------------------------------------------------------------------------------------------------------------------------------------------------------------------------------------------------------------------------------------------------------------------------------------------------------------------------------------------------------------------------------------------------------------------------------------------------------------------------------------------|
|                                              | <input type="checkbox"/> Hemodynamically unstable (Intensive Care)<br><input type="checkbox"/> Infection<br><input type="checkbox"/> Other                                                                                                                                                                                                                                                                                                                                                                                                                                                                                                                                                                                                                                                                                                                                                                                                                                                                                                                    |
| Maternal: type of admission                  | <input type="radio"/> Ward<br><input type="radio"/> Medium Care<br><input type="radio"/> Intensive Care                                                                                                                                                                                                                                                                                                                                                                                                                                                                                                                                                                                                                                                                                                                                                                                                                                                                                                                                                       |
| Maternal: discharge to                       | <input type="radio"/> Home<br><input type="radio"/> Other ward<br><input type="radio"/> Medium Care<br><input type="radio"/> Intensive Care<br><input type="radio"/> Other hospital                                                                                                                                                                                                                                                                                                                                                                                                                                                                                                                                                                                                                                                                                                                                                                                                                                                                           |
| Maternal: date of transfer                   | (dd-mm-yyyy)                                                                                                                                                                                                                                                                                                                                                                                                                                                                                                                                                                                                                                                                                                                                                                                                                                                                                                                                                                                                                                                  |
| Maternal: type of admission after transfer   | <input type="radio"/> Ward<br><input type="radio"/> Medium Care<br><input type="radio"/> Intensive Care                                                                                                                                                                                                                                                                                                                                                                                                                                                                                                                                                                                                                                                                                                                                                                                                                                                                                                                                                       |
| Maternal: date of final discharge to home    | (dd-mm-yyyy)                                                                                                                                                                                                                                                                                                                                                                                                                                                                                                                                                                                                                                                                                                                                                                                                                                                                                                                                                                                                                                                  |
| Neonatal: what was the reason for admission? | <input type="checkbox"/> Routine observation for blood glucoses<br><input type="checkbox"/> Routine observation for meconium<br><input type="checkbox"/> Routine observation for suspected infection<br><input type="checkbox"/> Hypoglycemia without i.v. glucose<br><input type="checkbox"/> Hypoglycemia with iv glucose<br><input type="checkbox"/> Hyperbilirubinemia with phototherapy<br><input type="checkbox"/> Hyperbilirubinemia without phototherapy<br><input type="checkbox"/> Respiratory distress syndrome (RDS) / respiratory support or oxygen >24 hours<br><input type="checkbox"/> Broncho pulmonary dysplasia (BPD)<br><input type="checkbox"/> Intraventricular haemorrhage<br><input type="checkbox"/> Sepsis<br><input type="checkbox"/> Necrotizing enterocolitis<br><input type="checkbox"/> Convulsions<br><input type="checkbox"/> Partial exchange transfusion<br><input type="checkbox"/> Trombocyte transfusion<br><input type="checkbox"/> Prematurity<br><input type="checkbox"/> Asphyxia<br><input type="checkbox"/> Other |
| Neonatal: type of admission                  | <input type="radio"/> Ward<br><input type="radio"/> Medium Care<br><input type="radio"/> Intensive Care                                                                                                                                                                                                                                                                                                                                                                                                                                                                                                                                                                                                                                                                                                                                                                                                                                                                                                                                                       |
| Neonatal: discharge to                       | <input type="radio"/> Home<br><input type="radio"/> Ward<br><input type="radio"/> Medium Care<br><input type="radio"/> Intensive Care                                                                                                                                                                                                                                                                                                                                                                                                                                                                                                                                                                                                                                                                                                                                                                                                                                                                                                                         |
| Neonatal: date of transfer                   | (dd-mm-yyyy)                                                                                                                                                                                                                                                                                                                                                                                                                                                                                                                                                                                                                                                                                                                                                                                                                                                                                                                                                                                                                                                  |
| Neonatal: type of admission after transfer   | <input type="radio"/> Ward<br><input type="radio"/> Medium Care                                                                                                                                                                                                                                                                                                                                                                                                                                                                                                                                                                                                                                                                                                                                                                                                                                                                                                                                                                                               |

|                                                                                                                                                    |                                                                                        |
|----------------------------------------------------------------------------------------------------------------------------------------------------|----------------------------------------------------------------------------------------|
|                                                                                                                                                    | <input type="radio"/> Intensive Care                                                   |
| Neonatal: date of final discharge to home                                                                                                          | (dd-mm-yyyy)                                                                           |
| Neonatal weight at time of discharge                                                                                                               | (grams)                                                                                |
| Did the neonate receive iv glucose infusion postpartum?                                                                                            | <input type="radio"/> Yes<br><input type="radio"/> No<br><input type="radio"/> Unknown |
| How many days of iv glucose infusion?                                                                                                              | (days)                                                                                 |
| <b>Diabetes treatment</b>                                                                                                                          |                                                                                        |
| What treatment was the participant randomized to?                                                                                                  | <input type="radio"/> Insulin<br><input type="radio"/> Oral hypoglycemic agents        |
| Did the participant ever use: metformin                                                                                                            | <input type="radio"/> Yes<br><input type="radio"/> No<br><input type="radio"/> Unknown |
| On which date did the participant start with metformin?                                                                                            | (dd-mm-yyyy)                                                                           |
| On which date did the participant stop with metformin?                                                                                             | (dd-mm-yyyy)                                                                           |
| Did the participant ever use: glibenclamide                                                                                                        | <input type="radio"/> Yes<br><input type="radio"/> No<br><input type="radio"/> Unknown |
| On which date did the participant start with glibenclamide?                                                                                        | (dd-mm-yyyy)                                                                           |
| On which date did the participant stop with glibenclamide?                                                                                         | (dd-mm-yyyy)                                                                           |
| Did the participant ever use: insulin?                                                                                                             | <input type="radio"/> Yes<br><input type="radio"/> No<br><input type="radio"/> Unknown |
| On which date did the participant start with insulin?<br>(If multiple types of insulin were used, use the start date of the first type of insulin) | (dd-mm-yyyy)                                                                           |
| On which date did the participant stop with insulin?<br>(If multiple types of insulin were used, use the start date of the first type of insulin)  | (dd-mm-yyyy)                                                                           |
| Glucose profile most recent before or at randomization: fasting value                                                                              | (mmol/L)                                                                               |
| Glucose profile most recent before or at randomization: after breakfast value                                                                      | (mmol/L)                                                                               |
| Glucose profile most recent before or at randomization: after lunch value                                                                          | (mmol/L)                                                                               |
| Glucose profile most recent before or at randomization: after dinner value                                                                         | (mmol/L)                                                                               |
| Most recent HbA1c value before or at randomization                                                                                                 | (mmol/mol)                                                                             |
| Date of most recent HbA1c value before or at randomization                                                                                         | (dd-mm-yyyy)                                                                           |
| HbA1c value at 30-31 weeks of gestation                                                                                                            | (mmol/mol)                                                                             |
| Date of HbA1c value at 30-31 weeks of gestation                                                                                                    | (dd-mm-yyyy)                                                                           |

|                                                                                                                                                                  |                                                                                                                                                                                                                                                                                                                                                                                                                                                                                  |
|------------------------------------------------------------------------------------------------------------------------------------------------------------------|----------------------------------------------------------------------------------------------------------------------------------------------------------------------------------------------------------------------------------------------------------------------------------------------------------------------------------------------------------------------------------------------------------------------------------------------------------------------------------|
| HbA1c value at 35-36 weeks of gestation                                                                                                                          | (mmol/mol)                                                                                                                                                                                                                                                                                                                                                                                                                                                                       |
| Date of HbA1c value at 35-36 weeks of gestation                                                                                                                  | (dd-mm-yyyy)                                                                                                                                                                                                                                                                                                                                                                                                                                                                     |
| <b>Additional tests</b>                                                                                                                                          |                                                                                                                                                                                                                                                                                                                                                                                                                                                                                  |
| Umbilical cord blood C-peptide value                                                                                                                             | (pmol/L)                                                                                                                                                                                                                                                                                                                                                                                                                                                                         |
| Umbilical cord blood glucose value                                                                                                                               | (mmol/L)                                                                                                                                                                                                                                                                                                                                                                                                                                                                         |
| Umbilical cord blood insulin value                                                                                                                               | (mIU/L)                                                                                                                                                                                                                                                                                                                                                                                                                                                                          |
| Umbilical cord blood fructosamine value                                                                                                                          | (µmol/L)                                                                                                                                                                                                                                                                                                                                                                                                                                                                         |
| Umbilical cord blood triglycerides                                                                                                                               | (mmol/L)                                                                                                                                                                                                                                                                                                                                                                                                                                                                         |
| <b>End of study</b>                                                                                                                                              |                                                                                                                                                                                                                                                                                                                                                                                                                                                                                  |
| Was there a protocol violation?                                                                                                                                  | <input type="radio"/> No<br><input type="radio"/> Yes<br><input type="radio"/> Unknown                                                                                                                                                                                                                                                                                                                                                                                           |
| Did a Serious Adverse Event (SAE) occur during the study until 6 weeks postpartum?<br>(If yes, please report the SAE to the sponsor)                             | <input type="radio"/> No<br><input type="radio"/> Yes<br><input type="radio"/> Unknown                                                                                                                                                                                                                                                                                                                                                                                           |
| Did a Suspected Unexpected Serious Adverse Reaction (SUSAR) occur during the study until 6 weeks postpartum?<br>(If yes, please report the SUSAR to the sponsor) | <input type="radio"/> No<br><input type="radio"/> Yes<br><input type="radio"/> Unknown                                                                                                                                                                                                                                                                                                                                                                                           |
| Please specify if the subject completed the entire course of the study as specified in the study protocol or discontinued the study:                             | <input type="radio"/> Completed<br><input type="radio"/> Discontinued                                                                                                                                                                                                                                                                                                                                                                                                            |
| If discontinued, please specify the most appropriate reason for early termination                                                                                | <input type="radio"/> Subject violates one or more of the inclusion/exclusion criteria<br><input type="radio"/> Adverse event<br><input type="radio"/> Participant deceased<br><input type="radio"/> Participant lost to follow up<br><input type="radio"/> Participant withdrew consent to use personal data<br><input type="radio"/> Investigator's and/or physician's decision<br><input type="radio"/> Total study is early terminated<br><input type="radio"/> Other reason |
| Has the participant signed informed consent for follow-up?                                                                                                       | <input type="radio"/> Yes<br><input type="radio"/> No                                                                                                                                                                                                                                                                                                                                                                                                                            |
| Has the participant provided contact information to allow follow-up?                                                                                             | <input type="radio"/> Yes<br><input type="radio"/> No                                                                                                                                                                                                                                                                                                                                                                                                                            |

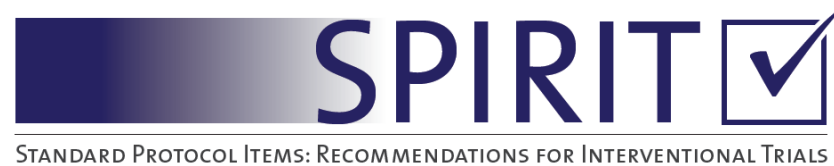

SPIRIT 2013 Checklist: Recommended items to address in a clinical trial protocol and related documents\*

Page numbers displayed at each item concern the pages in the protocol manuscript

For applicable items which are not incorporated in the protocol manuscript, we reference to the publically available study protocol document.

| Section/item                      | Item No | Description                                                                                                                                                                                                                                                                              | Addressed on page number   |
|-----------------------------------|---------|------------------------------------------------------------------------------------------------------------------------------------------------------------------------------------------------------------------------------------------------------------------------------------------|----------------------------|
| <b>Administrative information</b> |         |                                                                                                                                                                                                                                                                                          |                            |
| Title                             | 1       | Descriptive title identifying the study design, population, interventions, and, if applicable, trial acronym                                                                                                                                                                             | 1_____                     |
| Trial registration                | 2a      | Trial identifier and registry name. If not yet registered, name of intended registry                                                                                                                                                                                                     | 7 + 13_____                |
|                                   | 2b      | All items from the World Health Organization Trial Registration Data Set                                                                                                                                                                                                                 | Included in registry       |
| Protocol version                  | 3       | Date and version identifier                                                                                                                                                                                                                                                              | Trial website              |
| Funding                           | 4       | Sources and types of financial, material, and other support                                                                                                                                                                                                                              | 22_____                    |
| Roles and responsibilities        | 5a      | Names, affiliations, and roles of protocol contributors                                                                                                                                                                                                                                  | 1-6 and 21-22____          |
|                                   | 5b      | Name and contact information for the trial sponsor                                                                                                                                                                                                                                       | 22_____                    |
|                                   | 5c      | Role of study sponsor and funders, if any, in study design; collection, management, analysis, and interpretation of data; writing of the report; and the decision to submit the report for publication, including whether they will have ultimate authority over any of these activities | NA, investigator initiated |

1  
2  
3  
4  
5  
6  
7  
8  
9  
10  
11  
12  
13  
14  
15  
16  
17  
18  
19  
20  
21  
22  
23  
24  
25  
26  
27  
28  
29  
30  
31  
32  
33  
34  
35  
36  
37  
38  
39  
40  
41  
42  
43  
44  
45  
46

|  |    |                                                                                                                                                                                                                                                                  |                                     |
|--|----|------------------------------------------------------------------------------------------------------------------------------------------------------------------------------------------------------------------------------------------------------------------|-------------------------------------|
|  | 5d | Composition, roles, and responsibilities of the coordinating centre, steering committee, endpoint adjudication committee, data management team, and other individuals or groups overseeing the trial, if applicable (see Item 21a for data monitoring committee) | Publically available study protocol |
|--|----|------------------------------------------------------------------------------------------------------------------------------------------------------------------------------------------------------------------------------------------------------------------|-------------------------------------|

**Introduction**

|                          |    |                                                                                                                                                                                                    |            |
|--------------------------|----|----------------------------------------------------------------------------------------------------------------------------------------------------------------------------------------------------|------------|
| Background and rationale | 6a | Description of research question and justification for undertaking the trial, including summary of relevant studies (published and unpublished) examining benefits and harms for each intervention | 10-12_____ |
|--------------------------|----|----------------------------------------------------------------------------------------------------------------------------------------------------------------------------------------------------|------------|

|  |    |                                       |            |
|--|----|---------------------------------------|------------|
|  | 6b | Explanation for choice of comparators | 10-12_____ |
|--|----|---------------------------------------|------------|

|            |   |                                   |         |
|------------|---|-----------------------------------|---------|
| Objectives | 7 | Specific objectives or hypotheses | 12_____ |
|------------|---|-----------------------------------|---------|

|              |   |                                                                                                                                                                                                           |         |
|--------------|---|-----------------------------------------------------------------------------------------------------------------------------------------------------------------------------------------------------------|---------|
| Trial design | 8 | Description of trial design including type of trial (eg, parallel group, crossover, factorial, single group), allocation ratio, and framework (eg, superiority, equivalence, noninferiority, exploratory) | 12_____ |
|--------------|---|-----------------------------------------------------------------------------------------------------------------------------------------------------------------------------------------------------------|---------|

**Methods: Participants, interventions, and outcomes**

|               |   |                                                                                                                                                                                    |         |
|---------------|---|------------------------------------------------------------------------------------------------------------------------------------------------------------------------------------|---------|
| Study setting | 9 | Description of study settings (eg, community clinic, academic hospital) and list of countries where data will be collected. Reference to where list of study sites can be obtained | 12_____ |
|---------------|---|------------------------------------------------------------------------------------------------------------------------------------------------------------------------------------|---------|

|                      |    |                                                                                                                                                                                              |            |
|----------------------|----|----------------------------------------------------------------------------------------------------------------------------------------------------------------------------------------------|------------|
| Eligibility criteria | 10 | Inclusion and exclusion criteria for participants. If applicable, eligibility criteria for study centres and individuals who will perform the interventions (eg, surgeons, psychotherapists) | 13-14_____ |
|----------------------|----|----------------------------------------------------------------------------------------------------------------------------------------------------------------------------------------------|------------|

|               |     |                                                                                                                            |            |
|---------------|-----|----------------------------------------------------------------------------------------------------------------------------|------------|
| Interventions | 11a | Interventions for each group with sufficient detail to allow replication, including how and when they will be administered | 14-15_____ |
|---------------|-----|----------------------------------------------------------------------------------------------------------------------------|------------|

|  |     |                                                                                                                                                                                                |            |
|--|-----|------------------------------------------------------------------------------------------------------------------------------------------------------------------------------------------------|------------|
|  | 11b | Criteria for discontinuing or modifying allocated interventions for a given trial participant (eg, drug dose change in response to harms, participant request, or improving/worsening disease) | 14-15_____ |
|--|-----|------------------------------------------------------------------------------------------------------------------------------------------------------------------------------------------------|------------|

|  |     |                                                                                                                                                   |         |
|--|-----|---------------------------------------------------------------------------------------------------------------------------------------------------|---------|
|  | 11c | Strategies to improve adherence to intervention protocols, and any procedures for monitoring adherence (eg, drug tablet return, laboratory tests) | 15_____ |
|--|-----|---------------------------------------------------------------------------------------------------------------------------------------------------|---------|

|  |     |                                                                                               |            |
|--|-----|-----------------------------------------------------------------------------------------------|------------|
|  | 11d | Relevant concomitant care and interventions that are permitted or prohibited during the trial | 15-16_____ |
|--|-----|-----------------------------------------------------------------------------------------------|------------|



|    |                      |    |                                                                                                                                                                                                                                                                                                                                                                                |            |
|----|----------------------|----|--------------------------------------------------------------------------------------------------------------------------------------------------------------------------------------------------------------------------------------------------------------------------------------------------------------------------------------------------------------------------------|------------|
| 1  | Outcomes             | 12 | Primary, secondary, and other outcomes, including the specific measurement variable (eg, systolic blood pressure), analysis metric (eg, change from baseline, final value, time to event), method of aggregation (eg, median, proportion), and time point for each outcome. Explanation of the clinical relevance of chosen efficacy and harm outcomes is strongly recommended | 16-17_____ |
| 2  |                      |    |                                                                                                                                                                                                                                                                                                                                                                                |            |
| 3  |                      |    |                                                                                                                                                                                                                                                                                                                                                                                |            |
| 4  |                      |    |                                                                                                                                                                                                                                                                                                                                                                                |            |
| 5  |                      |    |                                                                                                                                                                                                                                                                                                                                                                                |            |
| 6  | Participant timeline | 13 | Time schedule of enrolment, interventions (including any run-ins and washouts), assessments, and visits for participants. A schematic diagram is highly recommended (see Figure)                                                                                                                                                                                               | 15-17_____ |
| 7  |                      |    |                                                                                                                                                                                                                                                                                                                                                                                |            |
| 8  |                      |    |                                                                                                                                                                                                                                                                                                                                                                                |            |
| 9  | Sample size          | 14 | Estimated number of participants needed to achieve study objectives and how it was determined, including clinical and statistical assumptions supporting any sample size calculations                                                                                                                                                                                          | 18_____    |
| 10 |                      |    |                                                                                                                                                                                                                                                                                                                                                                                |            |
| 11 |                      |    |                                                                                                                                                                                                                                                                                                                                                                                |            |
| 12 |                      |    |                                                                                                                                                                                                                                                                                                                                                                                |            |
| 13 | Recruitment          | 15 | Strategies for achieving adequate participant enrolment to reach target sample size                                                                                                                                                                                                                                                                                            | 14_____    |
| 14 |                      |    |                                                                                                                                                                                                                                                                                                                                                                                |            |

### Methods: Assignment of interventions (for controlled trials)

#### Allocation:

|    |                                  |     |                                                                                                                                                                                                                                                                                                                                                          |         |
|----|----------------------------------|-----|----------------------------------------------------------------------------------------------------------------------------------------------------------------------------------------------------------------------------------------------------------------------------------------------------------------------------------------------------------|---------|
| 19 | Sequence generation              | 16a | Method of generating the allocation sequence (eg, computer-generated random numbers), and list of any factors for stratification. To reduce predictability of a random sequence, details of any planned restriction (eg, blocking) should be provided in a separate document that is unavailable to those who enrol participants or assign interventions | 14_____ |
| 20 |                                  |     |                                                                                                                                                                                                                                                                                                                                                          |         |
| 21 |                                  |     |                                                                                                                                                                                                                                                                                                                                                          |         |
| 22 |                                  |     |                                                                                                                                                                                                                                                                                                                                                          |         |
| 23 |                                  |     |                                                                                                                                                                                                                                                                                                                                                          |         |
| 24 |                                  |     |                                                                                                                                                                                                                                                                                                                                                          |         |
| 25 | Allocation concealment mechanism | 16b | Mechanism of implementing the allocation sequence (eg, central telephone; sequentially numbered, opaque, sealed envelopes), describing any steps to conceal the sequence until interventions are assigned                                                                                                                                                | NA_____ |
| 26 |                                  |     |                                                                                                                                                                                                                                                                                                                                                          |         |
| 27 |                                  |     |                                                                                                                                                                                                                                                                                                                                                          |         |
| 28 |                                  |     |                                                                                                                                                                                                                                                                                                                                                          |         |
| 29 | Implementation                   | 16c | Who will generate the allocation sequence, who will enrol participants, and who will assign participants to interventions                                                                                                                                                                                                                                | 14_____ |
| 30 |                                  |     |                                                                                                                                                                                                                                                                                                                                                          |         |
| 31 |                                  |     |                                                                                                                                                                                                                                                                                                                                                          |         |
| 32 |                                  |     |                                                                                                                                                                                                                                                                                                                                                          |         |
| 33 | Blinding (masking)               | 17a | Who will be blinded after assignment to interventions (eg, trial participants, care providers, outcome assessors, data analysts), and how                                                                                                                                                                                                                | 11_____ |
| 34 |                                  |     |                                                                                                                                                                                                                                                                                                                                                          |         |
| 35 |                                  |     |                                                                                                                                                                                                                                                                                                                                                          |         |
| 36 |                                  | 17b | If blinded, circumstances under which unblinding is permissible, and procedure for revealing a participant's allocated intervention during the trial                                                                                                                                                                                                     | NA_____ |
| 37 |                                  |     |                                                                                                                                                                                                                                                                                                                                                          |         |
| 38 |                                  |     |                                                                                                                                                                                                                                                                                                                                                          |         |
| 39 |                                  |     |                                                                                                                                                                                                                                                                                                                                                          |         |

### Methods: Data collection, management, and analysis

|    |                            |     |                                                                                                               |                      |
|----|----------------------------|-----|---------------------------------------------------------------------------------------------------------------|----------------------|
| 1  | Data collection            | 18a | Plans for assessment and collection of outcome, baseline, and other trial data, including any related         | 29-41_____           |
| 2  | methods                    |     | processes to promote data quality (eg, duplicate measurements, training of assessors) and a description of    |                      |
| 3  |                            |     | study instruments (eg, questionnaires, laboratory tests) along with their reliability and validity, if known. |                      |
| 4  |                            |     | Reference to where data collection forms can be found, if not in the protocol                                 |                      |
| 5  |                            |     |                                                                                                               |                      |
| 6  |                            | 18b | Plans to promote participant retention and complete follow-up, including list of any outcome data to be       | Publically available |
| 7  |                            |     | collected for participants who discontinue or deviate from intervention protocols                             | study protocol       |
| 8  |                            |     |                                                                                                               |                      |
| 9  | Data management            | 19  | Plans for data entry, coding, security, and storage, including any related processes to promote data quality  | Publically available |
| 10 |                            |     | (eg, double data entry; range checks for data values). Reference to where details of data management          | study protocol       |
| 11 |                            |     | procedures can be found, if not in the protocol                                                               |                      |
| 12 |                            |     |                                                                                                               |                      |
| 13 |                            |     |                                                                                                               |                      |
| 14 | Statistical methods        | 20a | Statistical methods for analysing primary and secondary outcomes. Reference to where other details of the     | 18-19_____           |
| 15 |                            |     | statistical analysis plan can be found, if not in the protocol                                                |                      |
| 16 |                            |     |                                                                                                               |                      |
| 17 |                            | 20b | Methods for any additional analyses (eg, subgroup and adjusted analyses)                                      | 19_____              |
| 18 |                            |     |                                                                                                               |                      |
| 19 |                            | 20c | Definition of analysis population relating to protocol non-adherence (eg, as randomised analysis), and any    |                      |
| 20 |                            |     | statistical methods to handle missing data (eg, multiple imputation)                                          | 18_____              |
| 21 |                            |     |                                                                                                               |                      |
| 22 |                            |     |                                                                                                               |                      |
| 23 | <b>Methods: Monitoring</b> |     |                                                                                                               |                      |
| 24 |                            |     |                                                                                                               |                      |
| 25 | Data monitoring            | 21a | Composition of data monitoring committee (DMC); summary of its role and reporting structure; statement of     | Publically available |
| 26 |                            |     | whether it is independent from the sponsor and competing interests; and reference to where further details    | study protocol       |
| 27 |                            |     | about its charter can be found, if not in the protocol. Alternatively, an explanation of why a DMC is not     |                      |
| 28 |                            |     | needed                                                                                                        |                      |
| 29 |                            |     |                                                                                                               |                      |
| 30 |                            |     |                                                                                                               |                      |
| 31 |                            | 21b | Description of any interim analyses and stopping guidelines, including who will have access to these interim  | 17_____              |
| 32 |                            |     | results and make the final decision to terminate the trial                                                    |                      |
| 33 |                            |     |                                                                                                               |                      |
| 34 | Harms                      | 22  | Plans for collecting, assessing, reporting, and managing solicited and spontaneously reported adverse         | 17_____              |
| 35 |                            |     | events and other unintended effects of trial interventions or trial conduct                                   |                      |
| 36 |                            |     |                                                                                                               |                      |
| 37 | Auditing                   | 23  | Frequency and procedures for auditing trial conduct, if any, and whether the process will be independent      | 20_____              |
| 38 |                            |     | from investigators and the sponsor                                                                            |                      |
| 39 |                            |     |                                                                                                               |                      |
| 40 |                            |     |                                                                                                               |                      |

41 **Ethics and dissemination**

42

43

44

45

46

|    |                               |     |                                                                                                                                                                                                                                                                                     |                                        |
|----|-------------------------------|-----|-------------------------------------------------------------------------------------------------------------------------------------------------------------------------------------------------------------------------------------------------------------------------------------|----------------------------------------|
| 1  | Research ethics approval      | 24  | Plans for seeking research ethics committee/institutional review board (REC/IRB) approval                                                                                                                                                                                           | 20_____                                |
| 2  |                               |     |                                                                                                                                                                                                                                                                                     |                                        |
| 3  |                               |     |                                                                                                                                                                                                                                                                                     |                                        |
| 4  | Protocol amendments           | 25  | Plans for communicating important protocol modifications (eg, changes to eligibility criteria, outcomes, analyses) to relevant parties (eg, investigators, REC/IRBs, trial participants, trial registries, journals, regulators)                                                    | 20_____                                |
| 5  |                               |     |                                                                                                                                                                                                                                                                                     |                                        |
| 6  |                               |     |                                                                                                                                                                                                                                                                                     |                                        |
| 7  |                               |     |                                                                                                                                                                                                                                                                                     |                                        |
| 8  | Consent or assent             | 26a | Who will obtain informed consent or assent from potential trial participants or authorised surrogates, and how (see Item 32)                                                                                                                                                        | 13_____                                |
| 9  |                               |     |                                                                                                                                                                                                                                                                                     |                                        |
| 10 |                               |     |                                                                                                                                                                                                                                                                                     |                                        |
| 11 |                               |     |                                                                                                                                                                                                                                                                                     |                                        |
| 12 |                               | 26b | Additional consent provisions for collection and use of participant data and biological specimens in ancillary studies, if applicable                                                                                                                                               | Publicly available study protocol      |
| 13 |                               |     |                                                                                                                                                                                                                                                                                     |                                        |
| 14 | Confidentiality               | 27  | How personal information about potential and enrolled participants will be collected, shared, and maintained in order to protect confidentiality before, during, and after the trial                                                                                                | 19-20_____                             |
| 15 |                               |     |                                                                                                                                                                                                                                                                                     |                                        |
| 16 |                               |     |                                                                                                                                                                                                                                                                                     |                                        |
| 17 |                               |     |                                                                                                                                                                                                                                                                                     |                                        |
| 18 | Declaration of interests      | 28  | Financial and other competing interests for principal investigators for the overall trial and each study site                                                                                                                                                                       | 21_____                                |
| 19 |                               |     |                                                                                                                                                                                                                                                                                     |                                        |
| 20 |                               |     |                                                                                                                                                                                                                                                                                     |                                        |
| 21 | Access to data                | 29  | Statement of who will have access to the final trial dataset, and disclosure of contractual agreements that limit such access for investigators                                                                                                                                     | Publicly available study protocol_____ |
| 22 |                               |     |                                                                                                                                                                                                                                                                                     |                                        |
| 23 |                               |     |                                                                                                                                                                                                                                                                                     |                                        |
| 24 | Ancillary and post-trial care | 30  | Provisions, if any, for ancillary and post-trial care, and for compensation to those who suffer harm from trial participation                                                                                                                                                       | Publicly available study protocol_____ |
| 25 |                               |     |                                                                                                                                                                                                                                                                                     |                                        |
| 26 |                               |     |                                                                                                                                                                                                                                                                                     |                                        |
| 27 | Dissemination policy          | 31a | Plans for investigators and sponsor to communicate trial results to participants, healthcare professionals, the public, and other relevant groups (eg, via publication, reporting in results databases, or other data sharing arrangements), including any publication restrictions | 20_____                                |
| 28 |                               |     |                                                                                                                                                                                                                                                                                     |                                        |
| 29 |                               |     |                                                                                                                                                                                                                                                                                     |                                        |
| 30 |                               |     |                                                                                                                                                                                                                                                                                     |                                        |
| 31 |                               |     |                                                                                                                                                                                                                                                                                     |                                        |
| 32 |                               | 31b | Authorship eligibility guidelines and any intended use of professional writers                                                                                                                                                                                                      | NA_____                                |
| 33 |                               |     |                                                                                                                                                                                                                                                                                     |                                        |
| 34 |                               | 31c | Plans, if any, for granting public access to the full protocol, participant-level dataset, and statistical code                                                                                                                                                                     | 20_____                                |
| 35 |                               |     |                                                                                                                                                                                                                                                                                     |                                        |
| 36 | <b>Appendices</b>             |     |                                                                                                                                                                                                                                                                                     |                                        |
| 37 |                               |     |                                                                                                                                                                                                                                                                                     |                                        |
| 38 | Informed consent materials    | 32  | Model consent form and other related documentation given to participants and authorised surrogates                                                                                                                                                                                  | 20, study website                      |
| 39 |                               |     |                                                                                                                                                                                                                                                                                     |                                        |
| 40 |                               |     |                                                                                                                                                                                                                                                                                     |                                        |
| 41 |                               |     |                                                                                                                                                                                                                                                                                     |                                        |
| 42 |                               |     |                                                                                                                                                                                                                                                                                     |                                        |
| 43 |                               |     |                                                                                                                                                                                                                                                                                     |                                        |
| 44 |                               |     |                                                                                                                                                                                                                                                                                     |                                        |
| 45 |                               |     |                                                                                                                                                                                                                                                                                     |                                        |
| 46 |                               |     |                                                                                                                                                                                                                                                                                     |                                        |

|   |            |    |                                                                                                           |         |
|---|------------|----|-----------------------------------------------------------------------------------------------------------|---------|
| 1 | Biological | 33 | Plans for collection, laboratory evaluation, and storage of biological specimens for genetic or molecular | NA_____ |
| 2 | specimens  |    | analysis in the current trial and for future use in ancillary studies, if applicable                      |         |

---

4 \*It is strongly recommended that this checklist be read in conjunction with the SPIRIT 2013 Explanation & Elaboration for important clarification on the items.  
5 Amendments to the protocol should be tracked and dated. The SPIRIT checklist is copyrighted by the SPIRIT Group under the Creative Commons  
6 ["Attribution-NonCommercial-NoDerivs 3.0 Unported"](#) license.  
7

For peer review only

8  
9  
10  
11  
12  
13  
14  
15  
16  
17  
18  
19  
20  
21  
22  
23  
24  
25  
26  
27  
28  
29  
30  
31  
32  
33  
34  
35  
36  
37  
38  
39  
40  
41  
42  
43  
44  
45  
46
