# Supplementary material for: SUGAR-DIP trial: oral medication strategy versus insulin for diabetes in pregnancy, study protocol for a multicentre, open-label, non-inferiority, randomised controlled trial
Source: PubMed Central journal article supplement — BMJ Open. 2019 Aug 18;9(8):e029808. doi: 10.1136/bmjopen-2019-029808 (PMC6701578; doi:10.1136/bmjopen-2019-029808), 2019-08-18
Supplement: bmjopen-2019-029808supp002.pdf [file bmjopen-2019-029808supp002.pdf]

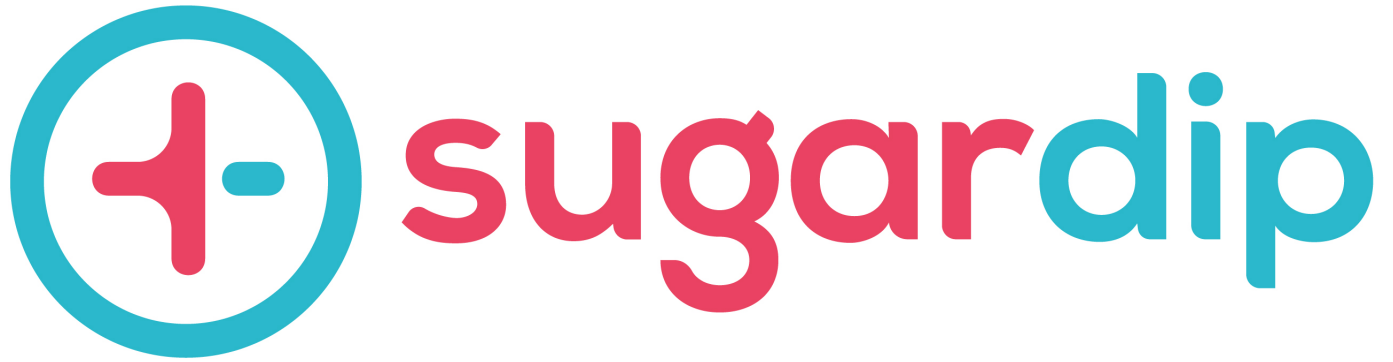

# SUGAR-DIP trial

Oral medication strategy versus insulin for diabetes in pregnancy

Electronic case report form

CRF data entry and randomization:

[www.castoredc.com](http://www.castoredc.com)

- Single possible answer
- Multiple answers possible

| <b>General information</b>                                                                                                      |                                                                                                                                                                                                                                                                                                                                      |
|---------------------------------------------------------------------------------------------------------------------------------|--------------------------------------------------------------------------------------------------------------------------------------------------------------------------------------------------------------------------------------------------------------------------------------------------------------------------------------|
| Maternal age at time of randomization                                                                                           | (years)                                                                                                                                                                                                                                                                                                                              |
| Estimated date of delivery                                                                                                      | (dd-mm-yyyy)                                                                                                                                                                                                                                                                                                                         |
| <b>In-exclusion</b>                                                                                                             |                                                                                                                                                                                                                                                                                                                                      |
| Age 18 years or older                                                                                                           | <input type="radio"/> Yes<br><input type="radio"/> No                                                                                                                                                                                                                                                                                |
| Singleton pregnancy                                                                                                             | <input type="radio"/> Yes<br><input type="radio"/> No                                                                                                                                                                                                                                                                                |
| Diagnosis if gestational diabetes mellitus as per national guidelines                                                           | <input type="radio"/> Yes<br><input type="radio"/> No                                                                                                                                                                                                                                                                                |
| Indication for pharmacological treatment of GDM                                                                                 | <input type="radio"/> Yes<br><input type="radio"/> No                                                                                                                                                                                                                                                                                |
| Gestational age between 16 and 34 weeks                                                                                         | <input type="radio"/> Yes<br><input type="radio"/> No                                                                                                                                                                                                                                                                                |
| Ability to understand Dutch or English                                                                                          | <input type="radio"/> Yes<br><input type="radio"/> No                                                                                                                                                                                                                                                                                |
|                                                                                                                                 |                                                                                                                                                                                                                                                                                                                                      |
| Known pre-existent type I or II diabetes mellitus                                                                               | <input type="radio"/> Yes<br><input type="radio"/> No                                                                                                                                                                                                                                                                                |
| Severe medical or psychological comorbidity                                                                                     | <input type="radio"/> Yes<br><input type="radio"/> No                                                                                                                                                                                                                                                                                |
| Liver disease or kidney failure, or any other condition with contraindications for the use of either metformin or glibenclamide | <input type="radio"/> Yes<br><input type="radio"/> No                                                                                                                                                                                                                                                                                |
| Fetus with major congenital birth defect and/or chromosomal abnormality                                                         | <input type="radio"/> Yes<br><input type="radio"/> No                                                                                                                                                                                                                                                                                |
| <b>Informed consent &amp; Randomization</b>                                                                                     |                                                                                                                                                                                                                                                                                                                                      |
| Patient has provided written informed consent                                                                                   | <input type="radio"/> Yes<br><input type="radio"/> No                                                                                                                                                                                                                                                                                |
| Date of informed consent                                                                                                        | (dd-mm-yyyy)                                                                                                                                                                                                                                                                                                                         |
| Date of randomization                                                                                                           | (dd-mm-yyyy)                                                                                                                                                                                                                                                                                                                         |
| Gestational age at time of randomization                                                                                        | ..... weeks + ..... days                                                                                                                                                                                                                                                                                                             |
| <b>Medical history</b>                                                                                                          |                                                                                                                                                                                                                                                                                                                                      |
| Ethnicity                                                                                                                       | <input type="radio"/> Caucasian/white<br><input type="radio"/> Indian/Pakistani/Bangladesi/Hindu<br><input type="radio"/> Black/African (Sub-Sahara)<br><input type="radio"/> Middle Eastern + North African (Turkey, Morocco, Egypt)<br><input type="radio"/> Asian<br><input type="radio"/> Other<br><input type="radio"/> Unknown |
| Diagnosis of Polycystic Ovary Syndrome (PCOS)                                                                                   | <input type="radio"/> Yes<br><input type="radio"/> No                                                                                                                                                                                                                                                                                |
| Thyroid problems: hypo- or hyperthyroidism                                                                                      | <input type="radio"/> Hypothyroidism<br><input type="radio"/> Hyperthyroidism                                                                                                                                                                                                                                                        |

|                                                                                                  |                                                                                                                                                                                                                                                                                                                                                                                                                                                                                                     |
|--------------------------------------------------------------------------------------------------|-----------------------------------------------------------------------------------------------------------------------------------------------------------------------------------------------------------------------------------------------------------------------------------------------------------------------------------------------------------------------------------------------------------------------------------------------------------------------------------------------------|
|                                                                                                  | <ul style="list-style-type: none"> <li>○ Thyroid problem, but type is unknown</li> <li>○ No</li> <li>○ Unknown</li> </ul>                                                                                                                                                                                                                                                                                                                                                                           |
| History of psychological problems                                                                | <ul style="list-style-type: none"> <li><input type="checkbox"/> Depression</li> <li><input type="checkbox"/> Anxiety disorder</li> <li><input type="checkbox"/> Burn-out</li> <li><input type="checkbox"/> Other</li> <li><input type="checkbox"/> None</li> <li><input type="checkbox"/> Unknown</li> </ul>                                                                                                                                                                                        |
| Maternal chronic or pre-existent hypertension                                                    | <ul style="list-style-type: none"> <li>○ Yes (requiring medication)</li> <li>○ Yes (not requiring medication)</li> <li>○ No</li> <li>○ Unknown</li> </ul>                                                                                                                                                                                                                                                                                                                                           |
| Maternal medication use (other than folic acid and vitamins) during pregnancy                    | <ul style="list-style-type: none"> <li><input type="checkbox"/> No</li> <li><input type="checkbox"/> Aspirin (Acetylsalicylic acid)</li> <li><input type="checkbox"/> Levothyroxine / Thyrox</li> <li><input type="checkbox"/> SSRI (including sertraline, (es)citalopram, paroxetine, fluoxetine)</li> <li><input type="checkbox"/> Tricyclic antidepressant (including amitriptyline, nortriptyline)</li> <li><input type="checkbox"/> Other</li> <li><input type="checkbox"/> Unknown</li> </ul> |
| <b>Family history</b>                                                                            |                                                                                                                                                                                                                                                                                                                                                                                                                                                                                                     |
| Family history of type I / type II diabetes mellitus (1 <sup>st</sup> or 2 <sup>nd</sup> degree) | <ul style="list-style-type: none"> <li>○ Yes</li> <li>○ No</li> <li>○ Unknown</li> </ul>                                                                                                                                                                                                                                                                                                                                                                                                            |
| Family history of gestational diabetes mellitus (1 <sup>st</sup> or 2 <sup>nd</sup> degree)      | <ul style="list-style-type: none"> <li>○ Yes</li> <li>○ No</li> <li>○ Unknown</li> </ul>                                                                                                                                                                                                                                                                                                                                                                                                            |
| Family history of hypertension (1 <sup>st</sup> or 2 <sup>nd</sup> degree)                       | <ul style="list-style-type: none"> <li>○ Yes</li> <li>○ No</li> <li>○ Unknown</li> </ul>                                                                                                                                                                                                                                                                                                                                                                                                            |
| Family history of preeclampsia (1 <sup>st</sup> or 2 <sup>nd</sup> degree)                       | <ul style="list-style-type: none"> <li>○ Yes</li> <li>○ No</li> <li>○ Unknown</li> </ul>                                                                                                                                                                                                                                                                                                                                                                                                            |
| Family history of congenital defects (1 <sup>st</sup> or 2 <sup>nd</sup> degree)                 | <ul style="list-style-type: none"> <li>○ Yes</li> <li>○ No</li> <li>○ Unknown</li> </ul>                                                                                                                                                                                                                                                                                                                                                                                                            |
| <b>Obstetric history</b>                                                                         |                                                                                                                                                                                                                                                                                                                                                                                                                                                                                                     |
| Gravidity                                                                                        | (n)                                                                                                                                                                                                                                                                                                                                                                                                                                                                                                 |
| Parity                                                                                           | (n)                                                                                                                                                                                                                                                                                                                                                                                                                                                                                                 |
| Living children                                                                                  | (n)                                                                                                                                                                                                                                                                                                                                                                                                                                                                                                 |
| Miscarriage – spontaneous abortion                                                               | (n)                                                                                                                                                                                                                                                                                                                                                                                                                                                                                                 |
| Abortus provocatus – induced abortion                                                            | (n)                                                                                                                                                                                                                                                                                                                                                                                                                                                                                                 |
| Extra-uterine gravidity                                                                          | (n)                                                                                                                                                                                                                                                                                                                                                                                                                                                                                                 |
| Intra-uterine death > 16 weeks                                                                   | (n)                                                                                                                                                                                                                                                                                                                                                                                                                                                                                                 |
| Any previous pregnancy with gestational diabetes mellitus?                                       | <ul style="list-style-type: none"> <li>○ No (no GDM in previous pregnancies)</li> <li>○ Yes</li> <li>○ Unknown</li> </ul>                                                                                                                                                                                                                                                                                                                                                                           |

|                                                                                                  |                                                                                                                                                                                                                                                                    |
|--------------------------------------------------------------------------------------------------|--------------------------------------------------------------------------------------------------------------------------------------------------------------------------------------------------------------------------------------------------------------------|
| How many pregnancies with gestational diabetes mellitus?                                         | (n)                                                                                                                                                                                                                                                                |
| Any pregnancy with GDM treated with insulin?                                                     | <input type="radio"/> No<br><input type="radio"/> Yes<br><input type="radio"/> Unknown                                                                                                                                                                             |
| Any previous pregnancy with pregnancy induced hypertension (PIH)?                                | <input type="radio"/> No (no PIH in previous pregnancies)<br><input type="radio"/> Yes<br><input type="radio"/> Unknown                                                                                                                                            |
| Any previous pregnancy with preeclampsia (PE)?                                                   | <input type="radio"/> No (no PE in previous pregnancies)<br><input type="radio"/> Yes<br><input type="radio"/> Unknown                                                                                                                                             |
| Any previous pregnancy with Hemolysis Elevated Liver enzymes and Low Platelets syndrome (HELLP)? | <input type="radio"/> No (no HELLP in previous pregnancies)<br><input type="radio"/> Yes<br><input type="radio"/> Unknown                                                                                                                                          |
| Any previous pregnancy with a preterm delivery (< 37 weeks of gestation)                         | <input type="radio"/> No (no preterm delivery in previous pregnancies)<br><input type="radio"/> Yes<br><input type="radio"/> Unknown                                                                                                                               |
| A caesarean section (primary or secondary) in the past?                                          | <input type="radio"/> No (no caesarean section in the past)<br><input type="radio"/> Yes<br><input type="radio"/> Unknown                                                                                                                                          |
| Any hemorrhagia postpartum (HPP, blood loss $\geq$ 1000ml) in the past?                          | <input type="radio"/> No (no HPP in the past)<br><input type="radio"/> Yes<br><input type="radio"/> Unknown                                                                                                                                                        |
| Please complete the following questions for all previous pregnancies > 16 weeks                  | Parity number: .....<br>Gestational age: ..... weeks + ..... days<br>Gender: male, female, unknown<br>Birth weight (grams): .....                                                                                                                                  |
| <b>Current pregnancy</b>                                                                         |                                                                                                                                                                                                                                                                    |
| Mode of conception                                                                               | <input type="radio"/> Spontaneous<br><input type="radio"/> Clomifene ovulation induction<br><input type="radio"/> Intra-uterine insemination (IUI)<br><input type="radio"/> IVF / ICSI<br><input type="radio"/> Egg cell donation<br><input type="radio"/> Unknown |
| Maternal height                                                                                  | (cm)                                                                                                                                                                                                                                                               |
| Maternal weight at start of pregnancy                                                            | (kg)                                                                                                                                                                                                                                                               |
| Maternal weight at time of study inclusion                                                       | (kg)                                                                                                                                                                                                                                                               |
| Maternal weight at time of delivery / last pre-delivery visit                                    | (kg)                                                                                                                                                                                                                                                               |
| Maternal weight gain (total) >12kg                                                               | <input type="radio"/> Yes<br><input type="radio"/> No<br><input type="radio"/> Unknown                                                                                                                                                                             |
| Maternal blood pressure systolic at first antenatal visit                                        | (mmHg)                                                                                                                                                                                                                                                             |
| Maternal blood pressure diastolic at first antenatal visit                                       | (mmHg)                                                                                                                                                                                                                                                             |
| Smoking during pregnancy                                                                         | <input type="radio"/> No                                                                                                                                                                                                                                           |

|                                                                                 |                                                                                                                                                                                                                                                                                                                                                                                                                                 |
|---------------------------------------------------------------------------------|---------------------------------------------------------------------------------------------------------------------------------------------------------------------------------------------------------------------------------------------------------------------------------------------------------------------------------------------------------------------------------------------------------------------------------|
|                                                                                 | <ul style="list-style-type: none"> <li><input type="radio"/> Quit in first trimester</li> <li><input type="radio"/> Quit later in pregnancy</li> <li><input type="radio"/> Yes (still smoking)</li> <li><input type="radio"/> Unknown</li> </ul>                                                                                                                                                                                |
| Alcohol use during pregnancy                                                    | <ul style="list-style-type: none"> <li><input type="radio"/> Yes</li> <li><input type="radio"/> No</li> <li><input type="radio"/> Unknown</li> </ul>                                                                                                                                                                                                                                                                            |
| Glucose value (random) in first trimester                                       | (mmol/L)                                                                                                                                                                                                                                                                                                                                                                                                                        |
| Diagnostic test used to determine gestational diabetes                          | <ul style="list-style-type: none"> <li><input type="radio"/> Oral glucose tolerance test (75 gram)</li> <li><input type="radio"/> Oral glucose tolerance test (100 gram)</li> <li><input type="radio"/> Fasting glucose level</li> <li><input type="radio"/> Glucose day curve</li> <li><input type="radio"/> Other</li> </ul>                                                                                                  |
| Date of GDM diagnosis                                                           | (dd-mm-yyyy)                                                                                                                                                                                                                                                                                                                                                                                                                    |
| Glucose value of 75 gram OGTT fasting (laboratory)                              | (mmol/L)                                                                                                                                                                                                                                                                                                                                                                                                                        |
| Glucose value of 75 gram OGTT 2 hours (laboratory)                              | (mmol/L)                                                                                                                                                                                                                                                                                                                                                                                                                        |
| Glucose value of 100 gram OGTT fasting (laboratory)                             | (mmol/L)                                                                                                                                                                                                                                                                                                                                                                                                                        |
| Glucose value of 100 gram OGTT 2 hours (laboratory)                             | (mmol/L)                                                                                                                                                                                                                                                                                                                                                                                                                        |
| Glucose value of 100 gram OGTT 3 hours (laboratory)                             | (mmol/L)                                                                                                                                                                                                                                                                                                                                                                                                                        |
| Glucose value fasting (laboratory)                                              | (mmol/L)                                                                                                                                                                                                                                                                                                                                                                                                                        |
| Highest glucose value of glucose day curve                                      | (mmol/L)                                                                                                                                                                                                                                                                                                                                                                                                                        |
| Main reason to perform OGTT                                                     | <ul style="list-style-type: none"> <li><input type="radio"/> Suspected macrosomia/estimated fetal weight &gt;p90 (current pregnancy)</li> <li><input type="radio"/> Family history with diabetes</li> <li><input type="radio"/> Obesity</li> <li><input type="radio"/> Prior pregnancy with GDM</li> <li><input type="radio"/> Ethnicity</li> <li><input type="radio"/> Other</li> <li><input type="radio"/> Unknown</li> </ul> |
| <b>Pregnancy complications</b>                                                  |                                                                                                                                                                                                                                                                                                                                                                                                                                 |
| Pregnancy induced hypertension (systolic BP > 140mmHg or diastolic BP > 90mmHg) | <ul style="list-style-type: none"> <li><input type="radio"/> Yes</li> <li><input type="radio"/> No</li> <li><input type="radio"/> Unknown</li> </ul>                                                                                                                                                                                                                                                                            |
| Pregnancy induced hypertension                                                  | <ul style="list-style-type: none"> <li><input type="radio"/> Without medication</li> <li><input type="radio"/> With medication (for instance labetalol or methyldopa)</li> <li><input type="radio"/> Unknown whether medication was used</li> <li><input type="radio"/> Other</li> </ul>                                                                                                                                        |
| Preeclampsia (hypertension with albuminuria)                                    | <ul style="list-style-type: none"> <li><input type="radio"/> Yes</li> <li><input type="radio"/> No</li> <li><input type="radio"/> Unknown</li> </ul>                                                                                                                                                                                                                                                                            |
| HELLP                                                                           | <ul style="list-style-type: none"> <li><input type="radio"/> Yes</li> <li><input type="radio"/> No</li> </ul>                                                                                                                                                                                                                                                                                                                   |

|                                                                                           |                                                                                                                                                                                                                                                                                                                                                                                                                                                                                                                                                                                                                           |
|-------------------------------------------------------------------------------------------|---------------------------------------------------------------------------------------------------------------------------------------------------------------------------------------------------------------------------------------------------------------------------------------------------------------------------------------------------------------------------------------------------------------------------------------------------------------------------------------------------------------------------------------------------------------------------------------------------------------------------|
|                                                                                           | <ul style="list-style-type: none"> <li>○ Unknown</li> </ul>                                                                                                                                                                                                                                                                                                                                                                                                                                                                                                                                                               |
| Trombo-embolic complications (deep venous thrombosis or lung-embolus)                     | <ul style="list-style-type: none"> <li>○ Yes</li> <li>○ No</li> <li>○ Unknown</li> </ul>                                                                                                                                                                                                                                                                                                                                                                                                                                                                                                                                  |
| Hospital admission because of severe glycaemic dysregulation                              | <ul style="list-style-type: none"> <li>○ Yes</li> <li>○ No</li> <li>○ Unknown</li> </ul>                                                                                                                                                                                                                                                                                                                                                                                                                                                                                                                                  |
| Fetal structural defects (ultrasound)                                                     | <ul style="list-style-type: none"> <li>○ Yes</li> <li>○ No</li> <li>○ Unknown</li> </ul>                                                                                                                                                                                                                                                                                                                                                                                                                                                                                                                                  |
| Fetal structural defects (ultrasound)                                                     | <ul style="list-style-type: none"> <li><input type="checkbox"/> Central nervous system, including spina bifida and anencephaly</li> <li><input type="checkbox"/> Skeletal system, including caudal regression syndrome, limb defects and sacral agenesis</li> <li><input type="checkbox"/> Cardiovascular, including transposition of the great vessels, septal defects, single umbilical artery (SUA), coarctation of the aorta</li> <li><input type="checkbox"/> Gastrointestinal, including duodenal atresia</li> <li><input type="checkbox"/> Unknown which system</li> <li><input type="checkbox"/> Other</li> </ul> |
| Macrosomia (EFW >p90 or FAC >p90 or mentioned in conclusion)                              | <ul style="list-style-type: none"> <li>○ Yes</li> <li>○ No</li> <li>○ Unknown</li> </ul>                                                                                                                                                                                                                                                                                                                                                                                                                                                                                                                                  |
| Intra-uterine growth restriction (IUGR) (EFW <p10 or FAC <p10 or mentioned in conclusion) | <ul style="list-style-type: none"> <li>○ Yes</li> <li>○ No</li> <li>○ Unknown</li> </ul>                                                                                                                                                                                                                                                                                                                                                                                                                                                                                                                                  |
| Polyhydramnios (ultrasound)                                                               | <ul style="list-style-type: none"> <li>○ Yes</li> <li>○ No</li> <li>○ Unknown</li> </ul>                                                                                                                                                                                                                                                                                                                                                                                                                                                                                                                                  |
| Oligohydramnios (ultrasound)                                                              | <ul style="list-style-type: none"> <li>○ Yes</li> <li>○ No</li> <li>○ Unknown</li> </ul>                                                                                                                                                                                                                                                                                                                                                                                                                                                                                                                                  |
| Corticosteroid used? (for instance because of imminent premature birth)                   | <ul style="list-style-type: none"> <li>○ Yes</li> <li>○ No</li> <li>○ Unknown</li> </ul>                                                                                                                                                                                                                                                                                                                                                                                                                                                                                                                                  |
| Intra-uterine death                                                                       | <ul style="list-style-type: none"> <li>○ Yes</li> <li>○ No</li> </ul>                                                                                                                                                                                                                                                                                                                                                                                                                                                                                                                                                     |
| Date of intra-uterine death                                                               | (dd-mm-yyyy)                                                                                                                                                                                                                                                                                                                                                                                                                                                                                                                                                                                                              |
| <b>Delivery</b>                                                                           |                                                                                                                                                                                                                                                                                                                                                                                                                                                                                                                                                                                                                           |
| Date of last dose of antidiabetic medication                                              | (dd-mm-yyyy)                                                                                                                                                                                                                                                                                                                                                                                                                                                                                                                                                                                                              |
| Time of last dose of antidiabetic medication                                              | (hh-mm)                                                                                                                                                                                                                                                                                                                                                                                                                                                                                                                                                                                                                   |
| Onset of labour                                                                           | <ul style="list-style-type: none"> <li>○ Spontaneously</li> <li>○ Primary caesarean section</li> <li>○ Induction</li> </ul>                                                                                                                                                                                                                                                                                                                                                                                                                                                                                               |
| Was induction planned for a different reason than gestational diabetes mellitus?          | <ul style="list-style-type: none"> <li>○ Yes</li> <li>○ No</li> </ul>                                                                                                                                                                                                                                                                                                                                                                                                                                                                                                                                                     |

|                                          |                                                                                                                                                                                                                                                                                                                                                                                                                                                                                                                                                                                                                                                                                                                                                                                 |
|------------------------------------------|---------------------------------------------------------------------------------------------------------------------------------------------------------------------------------------------------------------------------------------------------------------------------------------------------------------------------------------------------------------------------------------------------------------------------------------------------------------------------------------------------------------------------------------------------------------------------------------------------------------------------------------------------------------------------------------------------------------------------------------------------------------------------------|
|                                          | <input type="radio"/> Unknown                                                                                                                                                                                                                                                                                                                                                                                                                                                                                                                                                                                                                                                                                                                                                   |
| Reason for induction                     | <input type="checkbox"/> Elective<br><input type="checkbox"/> Ruptured membranes<br><input type="checkbox"/> Hypertension<br><input type="checkbox"/> Preeclampsia<br><input type="checkbox"/> HELLP syndrome<br><input type="checkbox"/> Maternal: blood glucose dysregulation<br><input type="checkbox"/> Maternal: other → specify<br><input type="checkbox"/> Fetal: suspected macrosomia<br><input type="checkbox"/> Fetal: suspected intra-uterine growth restriction<br><input type="checkbox"/> Fetal: no movements<br><input type="checkbox"/> Fetal: heart rate anomaly<br><input type="checkbox"/> Fetal: oligohydramnios<br><input type="checkbox"/> Fetal: meconium<br><input type="checkbox"/> Fetal: other → specify<br><input type="checkbox"/> Other → specify |
| Method of induction                      | <input type="checkbox"/> Foley catheter / mechanical<br><input type="checkbox"/> Prostaglandins<br><input type="checkbox"/> Amniotomy<br><input type="checkbox"/> Oxytocin<br><input type="checkbox"/> Other<br><input type="checkbox"/> Unknown                                                                                                                                                                                                                                                                                                                                                                                                                                                                                                                                |
| Indication for primary caesarean section | <input type="checkbox"/> Elective: breech<br><input type="checkbox"/> Elective: obstetric history (previous caesarean section)<br><input type="checkbox"/> Elective: obstetric history (total sphincter rupture)<br><input type="checkbox"/> Elective: obstetric history (other)<br><input type="checkbox"/> Fetal distress<br><input type="checkbox"/> Fetal: intra-uterine growth restriction<br><input type="checkbox"/> Fetal: other<br><input type="checkbox"/> Maternal: hypertension<br><input type="checkbox"/> Maternal: preeclampsia<br><input type="checkbox"/> Maternal: HELLP syndrome<br><input type="checkbox"/> Maternal: other<br><input type="checkbox"/> Unknown                                                                                             |
| Pain relief during delivery              | <input type="checkbox"/> None<br><input type="checkbox"/> Opioid subcutaneous (pethidine)<br><input type="checkbox"/> Opioid intravenous (remifentanyl)<br><input type="checkbox"/> Nitrous oxide<br><input type="checkbox"/> Epidural<br><input type="checkbox"/> Other<br><input type="checkbox"/> Unknown                                                                                                                                                                                                                                                                                                                                                                                                                                                                    |
| Medication during labour                 | <input type="checkbox"/> Oxytocin<br><input type="checkbox"/> Antibiotics<br><input type="checkbox"/> Tocolytics<br><input type="checkbox"/> Glucose/insulin intravenous<br><input type="checkbox"/> Antihypertensive agents intravenous<br><input type="checkbox"/> Other → specify                                                                                                                                                                                                                                                                                                                                                                                                                                                                                            |

|                                                   |                                                                                                                                                                                                                                                                                                                                                                                                                                                                         |
|---------------------------------------------------|-------------------------------------------------------------------------------------------------------------------------------------------------------------------------------------------------------------------------------------------------------------------------------------------------------------------------------------------------------------------------------------------------------------------------------------------------------------------------|
|                                                   | <input type="checkbox"/> None<br><input type="checkbox"/> Unknown                                                                                                                                                                                                                                                                                                                                                                                                       |
| Fever during delivery                             | <input type="radio"/> No<br><input type="radio"/> Yes (>38°C <38.5°C)<br><input type="radio"/> Yes (≥38.5°C)<br><input type="radio"/> Unknown                                                                                                                                                                                                                                                                                                                           |
| Fetal presentation                                | <input type="radio"/> Cephalic<br><input type="radio"/> Breech<br><input type="radio"/> Other                                                                                                                                                                                                                                                                                                                                                                           |
| Route of delivery                                 | <input type="radio"/> Vaginal, spontaneously<br><input type="radio"/> Instrumental (vacuum extraction)<br><input type="radio"/> Instrumental (forcipal extraction)<br><input type="radio"/> Secondary caesarean section                                                                                                                                                                                                                                                 |
| Indication for vacuum / forcipal extraction       | <input type="radio"/> Fetal distress<br><input type="radio"/> Failure to progress<br><input type="radio"/> Maternal indication<br><input type="radio"/> Other fetal indication<br><input type="radio"/> Unknown                                                                                                                                                                                                                                                         |
| Indication for secondary caesarean section        | <input type="radio"/> Fetal distress<br><input type="radio"/> Failure to progress<br><input type="radio"/> Failed induction<br><input type="radio"/> Maternal indication<br><input type="radio"/> Failed vacuum / forcipal extraction<br><input type="radio"/> Other fetal indication<br><input type="radio"/> Unknown                                                                                                                                                  |
| Were maneuvers used because of shoulder dystocia? | <input type="checkbox"/> No (no shoulder dystocia)<br><input type="checkbox"/> Traction to the fetal head<br><input type="checkbox"/> McRoberts<br><input type="checkbox"/> Rubin<br><input type="checkbox"/> All-fours<br><input type="checkbox"/> Manual delivery of posterior arm<br><input type="checkbox"/> Intentional breaking of clavicle<br><input type="checkbox"/> Shoulder dystocia but unknown which maneuvers were used<br><input type="checkbox"/> Other |
| Amniotic fluid                                    | <input type="radio"/> Clear<br><input type="radio"/> Meconium stained<br><input type="radio"/> Unknown                                                                                                                                                                                                                                                                                                                                                                  |
| Delivery of the placenta                          | <input type="radio"/> Spontaneously / controlled cord traction<br><input type="radio"/> Manual removal in operating room<br><input type="radio"/> Removed during caesarean section<br><input type="radio"/> Unknown                                                                                                                                                                                                                                                     |
| Total blood loss                                  | (ml)                                                                                                                                                                                                                                                                                                                                                                                                                                                                    |
| Blood transfusion                                 | <input type="radio"/> Yes<br><input type="radio"/> No<br><input type="radio"/> Unknown                                                                                                                                                                                                                                                                                                                                                                                  |
| Perineum                                          | <input type="checkbox"/> No laceration(s)<br><input type="checkbox"/> First / second degree laceration(s)                                                                                                                                                                                                                                                                                                                                                               |



|                                                   |                                                                                                                                                                                   |
|---------------------------------------------------|-----------------------------------------------------------------------------------------------------------------------------------------------------------------------------------|
|                                                   | <input type="checkbox"/> Third degree laceration(s)<br><input type="checkbox"/> Episiotomy<br><input type="checkbox"/> Unknown                                                    |
| <b>Neonatal data</b>                              |                                                                                                                                                                                   |
| Date of birth                                     | (dd-mm-yyyy)                                                                                                                                                                      |
| Gestational age at birth                          | ..... weeks + ..... days                                                                                                                                                          |
| Live birth                                        | <input type="radio"/> Yes<br><input type="radio"/> No                                                                                                                             |
| Neonatal death                                    | <input type="radio"/> No<br><input type="radio"/> Yes (intra-uterine death)<br><input type="radio"/> Yes, <24 hours postpartum<br><input type="radio"/> Yes, >24 hours postpartum |
| Gender                                            | <input type="radio"/> Female<br><input type="radio"/> Male<br><input type="radio"/> Unknown                                                                                       |
| Apgar score 1 minute postpartum                   |                                                                                                                                                                                   |
| Apgar score 5 minutes postpartum                  |                                                                                                                                                                                   |
| Apgar score 10 minutes postpartum                 |                                                                                                                                                                                   |
| Umbilical cord blood pH (arterial)                |                                                                                                                                                                                   |
| Umbilical cord blood base excess (arterial)       |                                                                                                                                                                                   |
| Umbilical cord blood pH (venous)                  |                                                                                                                                                                                   |
| Umbilical cord blood base excess (venous)         |                                                                                                                                                                                   |
| Birth weight                                      | (grams)                                                                                                                                                                           |
| Fracture                                          | <input type="checkbox"/> None<br><input type="checkbox"/> Humerus<br><input type="checkbox"/> Clavicle<br><input type="checkbox"/> Other<br><input type="checkbox"/> Unknown      |
| Erbs palsy                                        | <input type="radio"/> No<br><input type="radio"/> Yes<br><input type="radio"/> Unknown                                                                                            |
| Preterm birth (<37 weeks of gestation)            | <input type="radio"/> No<br><input type="radio"/> Yes (iatrogenic)<br><input type="radio"/> Yes (spontaneous)                                                                     |
| Neonatal congenital malformation: heart           | <input type="radio"/> No<br><input type="radio"/> Yes<br><input type="radio"/> Unknown                                                                                            |
| Neonatal congenital malformation: neural tube     | <input type="radio"/> No<br><input type="radio"/> Yes<br><input type="radio"/> Unknown                                                                                            |
| Neonatal congenital malformation: urogenital      | <input type="radio"/> No<br><input type="radio"/> Yes<br><input type="radio"/> Unknown                                                                                            |
| Neonatal congenital malformation: other           | <input type="radio"/> No<br><input type="radio"/> Yes<br><input type="radio"/> Unknown                                                                                            |
| First neonatal glucose postpartum                 | (mmol/L)                                                                                                                                                                          |
| Date of first neonatal glucose testing postpartum | (dd-mm-yyyy)                                                                                                                                                                      |
| Time of first neonatal glucose testing postpartum | (hh:mm)                                                                                                                                                                           |

|                                                                                                       |                                                                                                                                                                                                                                                                                                                                                                                                                                                                                                                                                                                                                                |
|-------------------------------------------------------------------------------------------------------|--------------------------------------------------------------------------------------------------------------------------------------------------------------------------------------------------------------------------------------------------------------------------------------------------------------------------------------------------------------------------------------------------------------------------------------------------------------------------------------------------------------------------------------------------------------------------------------------------------------------------------|
| Second neonatal glucose value postpartum                                                              | (mmol/L)                                                                                                                                                                                                                                                                                                                                                                                                                                                                                                                                                                                                                       |
| Date of second neonatal glucose testing postpartum                                                    | (dd-mm-yyyy)                                                                                                                                                                                                                                                                                                                                                                                                                                                                                                                                                                                                                   |
| Time of second neonatal glucose testing postpartum                                                    | (hh:mm)                                                                                                                                                                                                                                                                                                                                                                                                                                                                                                                                                                                                                        |
| Third neonatal glucose value postpartum                                                               | (mmol/L)                                                                                                                                                                                                                                                                                                                                                                                                                                                                                                                                                                                                                       |
| Date of third neonatal glucose testing postpartum                                                     | (dd-mm-yyyy)                                                                                                                                                                                                                                                                                                                                                                                                                                                                                                                                                                                                                   |
| Time of third neonatal glucose testing postpartum                                                     | (hh:mm)                                                                                                                                                                                                                                                                                                                                                                                                                                                                                                                                                                                                                        |
| Fourth neonatal glucose value postpartum                                                              | (mmol/L)                                                                                                                                                                                                                                                                                                                                                                                                                                                                                                                                                                                                                       |
| Date of fourth neonatal glucose testing postpartum                                                    | (dd-mm-yyyy)                                                                                                                                                                                                                                                                                                                                                                                                                                                                                                                                                                                                                   |
| Time of fourth neonatal glucose testing postpartum                                                    | (hh:mm)                                                                                                                                                                                                                                                                                                                                                                                                                                                                                                                                                                                                                        |
| Fifth neonatal glucose value postpartum                                                               | (mmol/L)                                                                                                                                                                                                                                                                                                                                                                                                                                                                                                                                                                                                                       |
| Date of fifth neonatal glucose testing postpartum                                                     | (dd-mm-yyyy)                                                                                                                                                                                                                                                                                                                                                                                                                                                                                                                                                                                                                   |
| Time of fifth neonatal glucose testing postpartum                                                     | (hh:mm)                                                                                                                                                                                                                                                                                                                                                                                                                                                                                                                                                                                                                        |
| Sixth neonatal glucose value postpartum                                                               | (mmol/L)                                                                                                                                                                                                                                                                                                                                                                                                                                                                                                                                                                                                                       |
| Date of sixth neonatal glucose testing postpartum                                                     | (dd-mm-yyyy)                                                                                                                                                                                                                                                                                                                                                                                                                                                                                                                                                                                                                   |
| Time of sixth neonatal glucose testing postpartum                                                     | (hh:mm)                                                                                                                                                                                                                                                                                                                                                                                                                                                                                                                                                                                                                        |
| Any neonatal glucose value between 2.0-2.6mmol/L ( $\geq 2.0 < 2.7$ ) during in hospital admission?   | <ul style="list-style-type: none"> <li><input type="radio"/> No</li> <li><input type="radio"/> Yes, one value between 2.0 and 2.6</li> <li><input type="radio"/> Yes, more than one value between 2.0 and 2.6</li> <li><input type="radio"/> Unknown</li> </ul>                                                                                                                                                                                                                                                                                                                                                                |
| Any neonatal glucose value $< 2.0$ mmol/L during hospital admission?                                  | <ul style="list-style-type: none"> <li><input type="radio"/> No</li> <li><input type="radio"/> Yes, one value <math>&lt; 2.0</math></li> <li><input type="radio"/> Yes, more than one value <math>&lt; 2.0</math></li> <li><input type="radio"/> Unknown</li> </ul>                                                                                                                                                                                                                                                                                                                                                            |
| <b>Postpartum</b>                                                                                     |                                                                                                                                                                                                                                                                                                                                                                                                                                                                                                                                                                                                                                |
| Were mother or child admitted directly postpartum? (including postpartum observation of mother/child) | <ul style="list-style-type: none"> <li><input type="radio"/> No (mother and child went home directly after delivery)</li> <li><input type="radio"/> Yes, maternal admission only</li> <li><input type="radio"/> Yes, maternal and neonatal admission</li> <li><input type="radio"/> Yes, neonatal admission only</li> </ul>                                                                                                                                                                                                                                                                                                    |
| Maternal: what was the reason for admission?                                                          | <ul style="list-style-type: none"> <li><input type="checkbox"/> Maternal observation/routine stay (for instance because of more blood loss than usual or post-caesarean)</li> <li><input type="checkbox"/> Neonatal observation (for instance because of blood glucose evaluation)</li> <li><input type="checkbox"/> Fluxus (HPP)</li> <li><input type="checkbox"/> Pregnancy induced hypertension</li> <li><input type="checkbox"/> Preeclampsia</li> <li><input type="checkbox"/> HELLP syndrome</li> <li><input type="checkbox"/> Glycemic dysregulation</li> <li><input type="checkbox"/> Thrombo-embolic event</li> </ul> |

|                                              |                                                                                                                                                                                                                                                                                                                                                                                                                                                                                                                                                                                                                                                                                                                                                                                                                                                                                                                                                                                                                                                               |
|----------------------------------------------|---------------------------------------------------------------------------------------------------------------------------------------------------------------------------------------------------------------------------------------------------------------------------------------------------------------------------------------------------------------------------------------------------------------------------------------------------------------------------------------------------------------------------------------------------------------------------------------------------------------------------------------------------------------------------------------------------------------------------------------------------------------------------------------------------------------------------------------------------------------------------------------------------------------------------------------------------------------------------------------------------------------------------------------------------------------|
|                                              | <input type="checkbox"/> Hemodynamically unstable (Intensive Care)<br><input type="checkbox"/> Infection<br><input type="checkbox"/> Other                                                                                                                                                                                                                                                                                                                                                                                                                                                                                                                                                                                                                                                                                                                                                                                                                                                                                                                    |
| Maternal: type of admission                  | <input type="radio"/> Ward<br><input type="radio"/> Medium Care<br><input type="radio"/> Intensive Care                                                                                                                                                                                                                                                                                                                                                                                                                                                                                                                                                                                                                                                                                                                                                                                                                                                                                                                                                       |
| Maternal: discharge to                       | <input type="radio"/> Home<br><input type="radio"/> Other ward<br><input type="radio"/> Medium Care<br><input type="radio"/> Intensive Care<br><input type="radio"/> Other hospital                                                                                                                                                                                                                                                                                                                                                                                                                                                                                                                                                                                                                                                                                                                                                                                                                                                                           |
| Maternal: date of transfer                   | (dd-mm-yyyy)                                                                                                                                                                                                                                                                                                                                                                                                                                                                                                                                                                                                                                                                                                                                                                                                                                                                                                                                                                                                                                                  |
| Maternal: type of admission after transfer   | <input type="radio"/> Ward<br><input type="radio"/> Medium Care<br><input type="radio"/> Intensive Care                                                                                                                                                                                                                                                                                                                                                                                                                                                                                                                                                                                                                                                                                                                                                                                                                                                                                                                                                       |
| Maternal: date of final discharge to home    | (dd-mm-yyyy)                                                                                                                                                                                                                                                                                                                                                                                                                                                                                                                                                                                                                                                                                                                                                                                                                                                                                                                                                                                                                                                  |
| Neonatal: what was the reason for admission? | <input type="checkbox"/> Routine observation for blood glucoses<br><input type="checkbox"/> Routine observation for meconium<br><input type="checkbox"/> Routine observation for suspected infection<br><input type="checkbox"/> Hypoglycemia without i.v. glucose<br><input type="checkbox"/> Hypoglycemia with iv glucose<br><input type="checkbox"/> Hyperbilirubinemia with phototherapy<br><input type="checkbox"/> Hyperbilirubinemia without phototherapy<br><input type="checkbox"/> Respiratory distress syndrome (RDS) / respiratory support or oxygen >24 hours<br><input type="checkbox"/> Broncho pulmonary dysplasia (BPD)<br><input type="checkbox"/> Intraventricular haemorrhage<br><input type="checkbox"/> Sepsis<br><input type="checkbox"/> Necrotizing enterocolitis<br><input type="checkbox"/> Convulsions<br><input type="checkbox"/> Partial exchange transfusion<br><input type="checkbox"/> Trombocyte transfusion<br><input type="checkbox"/> Prematurity<br><input type="checkbox"/> Asphyxia<br><input type="checkbox"/> Other |
| Neonatal: type of admission                  | <input type="radio"/> Ward<br><input type="radio"/> Medium Care<br><input type="radio"/> Intensive Care                                                                                                                                                                                                                                                                                                                                                                                                                                                                                                                                                                                                                                                                                                                                                                                                                                                                                                                                                       |
| Neonatal: discharge to                       | <input type="radio"/> Home<br><input type="radio"/> Ward<br><input type="radio"/> Medium Care<br><input type="radio"/> Intensive Care                                                                                                                                                                                                                                                                                                                                                                                                                                                                                                                                                                                                                                                                                                                                                                                                                                                                                                                         |
| Neonatal: date of transfer                   | (dd-mm-yyyy)                                                                                                                                                                                                                                                                                                                                                                                                                                                                                                                                                                                                                                                                                                                                                                                                                                                                                                                                                                                                                                                  |
| Neonatal: type of admission after transfer   | <input type="radio"/> Ward<br><input type="radio"/> Medium Care                                                                                                                                                                                                                                                                                                                                                                                                                                                                                                                                                                                                                                                                                                                                                                                                                                                                                                                                                                                               |

|                                                                                                                                                    |                                                                                        |
|----------------------------------------------------------------------------------------------------------------------------------------------------|----------------------------------------------------------------------------------------|
|                                                                                                                                                    | <input type="radio"/> Intensive Care                                                   |
| Neonatal: date of final discharge to home                                                                                                          | (dd-mm-yyyy)                                                                           |
| Neonatal weight at time of discharge                                                                                                               | (grams)                                                                                |
| Did the neonate receive iv glucose infusion postpartum?                                                                                            | <input type="radio"/> Yes<br><input type="radio"/> No<br><input type="radio"/> Unknown |
| How many days of iv glucose infusion?                                                                                                              | (days)                                                                                 |
| <b>Diabetes treatment</b>                                                                                                                          |                                                                                        |
| What treatment was the participant randomized to?                                                                                                  | <input type="radio"/> Insulin<br><input type="radio"/> Oral hypoglycemic agents        |
| Did the participant ever use: metformin                                                                                                            | <input type="radio"/> Yes<br><input type="radio"/> No<br><input type="radio"/> Unknown |
| On which date did the participant start with metformin?                                                                                            | (dd-mm-yyyy)                                                                           |
| On which date did the participant stop with metformin?                                                                                             | (dd-mm-yyyy)                                                                           |
| Did the participant ever use: glibenclamide                                                                                                        | <input type="radio"/> Yes<br><input type="radio"/> No<br><input type="radio"/> Unknown |
| On which date did the participant start with glibenclamide?                                                                                        | (dd-mm-yyyy)                                                                           |
| On which date did the participant stop with glibenclamide?                                                                                         | (dd-mm-yyyy)                                                                           |
| Did the participant ever use: insulin?                                                                                                             | <input type="radio"/> Yes<br><input type="radio"/> No<br><input type="radio"/> Unknown |
| On which date did the participant start with insulin?<br>(If multiple types of insulin were used, use the start date of the first type of insulin) | (dd-mm-yyyy)                                                                           |
| On which date did the participant stop with insulin?<br>(If multiple types of insulin were used, use the start date of the first type of insulin)  | (dd-mm-yyyy)                                                                           |
| Glucose profile most recent before or at randomization: fasting value                                                                              | (mmol/L)                                                                               |
| Glucose profile most recent before or at randomization: after breakfast value                                                                      | (mmol/L)                                                                               |
| Glucose profile most recent before or at randomization: after lunch value                                                                          | (mmol/L)                                                                               |
| Glucose profile most recent before or at randomization: after dinner value                                                                         | (mmol/L)                                                                               |
| Most recent HbA1c value before or at randomization                                                                                                 | (mmol/mol)                                                                             |
| Date of most recent HbA1c value before or at randomization                                                                                         | (dd-mm-yyyy)                                                                           |
| HbA1c value at 30-31 weeks of gestation                                                                                                            | (mmol/mol)                                                                             |
| Date of HbA1c value at 30-31 weeks of gestation                                                                                                    | (dd-mm-yyyy)                                                                           |

|                                                                                                                                                                  |                                                                                                                                                                                                                                                                                                                                                                                                                                                                                  |
|------------------------------------------------------------------------------------------------------------------------------------------------------------------|----------------------------------------------------------------------------------------------------------------------------------------------------------------------------------------------------------------------------------------------------------------------------------------------------------------------------------------------------------------------------------------------------------------------------------------------------------------------------------|
| HbA1c value at 35-36 weeks of gestation                                                                                                                          | (mmol/mol)                                                                                                                                                                                                                                                                                                                                                                                                                                                                       |
| Date of HbA1c value at 35-36 weeks of gestation                                                                                                                  | (dd-mm-yyyy)                                                                                                                                                                                                                                                                                                                                                                                                                                                                     |
| <b>Additional tests</b>                                                                                                                                          |                                                                                                                                                                                                                                                                                                                                                                                                                                                                                  |
| Umbilical cord blood C-peptide value                                                                                                                             | (pmol/L)                                                                                                                                                                                                                                                                                                                                                                                                                                                                         |
| Umbilical cord blood glucose value                                                                                                                               | (mmol/L)                                                                                                                                                                                                                                                                                                                                                                                                                                                                         |
| Umbilical cord blood insulin value                                                                                                                               | (mIU/L)                                                                                                                                                                                                                                                                                                                                                                                                                                                                          |
| Umbilical cord blood fructosamine value                                                                                                                          | (µmol/L)                                                                                                                                                                                                                                                                                                                                                                                                                                                                         |
| Umbilical cord blood triglycerides                                                                                                                               | (mmol/L)                                                                                                                                                                                                                                                                                                                                                                                                                                                                         |
| <b>End of study</b>                                                                                                                                              |                                                                                                                                                                                                                                                                                                                                                                                                                                                                                  |
| Was there a protocol violation?                                                                                                                                  | <input type="radio"/> No<br><input type="radio"/> Yes<br><input type="radio"/> Unknown                                                                                                                                                                                                                                                                                                                                                                                           |
| Did a Serious Adverse Event (SAE) occur during the study until 6 weeks postpartum?<br>(If yes, please report the SAE to the sponsor)                             | <input type="radio"/> No<br><input type="radio"/> Yes<br><input type="radio"/> Unknown                                                                                                                                                                                                                                                                                                                                                                                           |
| Did a Suspected Unexpected Serious Adverse Reaction (SUSAR) occur during the study until 6 weeks postpartum?<br>(If yes, please report the SUSAR to the sponsor) | <input type="radio"/> No<br><input type="radio"/> Yes<br><input type="radio"/> Unknown                                                                                                                                                                                                                                                                                                                                                                                           |
| Please specify if the subject completed the entire course of the study as specified in the study protocol or discontinued the study:                             | <input type="radio"/> Completed<br><input type="radio"/> Discontinued                                                                                                                                                                                                                                                                                                                                                                                                            |
| If discontinued, please specify the most appropriate reason for early termination                                                                                | <input type="radio"/> Subject violates one or more of the inclusion/exclusion criteria<br><input type="radio"/> Adverse event<br><input type="radio"/> Participant deceased<br><input type="radio"/> Participant lost to follow up<br><input type="radio"/> Participant withdrew consent to use personal data<br><input type="radio"/> Investigator's and/or physician's decision<br><input type="radio"/> Total study is early terminated<br><input type="radio"/> Other reason |
| Has the participant signed informed consent for follow-up?                                                                                                       | <input type="radio"/> Yes<br><input type="radio"/> No                                                                                                                                                                                                                                                                                                                                                                                                                            |
| Has the participant provided contact information to allow follow-up?                                                                                             | <input type="radio"/> Yes<br><input type="radio"/> No                                                                                                                                                                                                                                                                                                                                                                                                                            |
